# Supplementary material for: From Microbial Dynamics to Functionality in the Rhizosphere: A Systematic Review of the Opportunities With Synthetic Microbial Communities
Source: Front Plant Sci. 2021 Jun 3;12:650609. doi: 10.3389/fpls.2021.650609 (PMC8210828; doi:10.3389/fpls.2021.650609)
Supplement: Supplementary Figure 1 — PRISMA diagram of the literature filtering process. [file Data_Sheet_1.zip]

Archive with 4 entries (4 files):
- Supplementary Figure 1.pdf
- Supplementary Table 1.docx
- Supplementary Table 2.xlsx
- Supplementary Table 3.docx
