# Supplementary material for: From Microbial Dynamics to Functionality in the Rhizosphere: A Systematic Review of the Opportunities With Synthetic Microbial Communities
Source: Front Plant Sci. 2021 Jun 3;12:650609. doi: 10.3389/fpls.2021.650609 (PMC8210828; doi:10.3389/fpls.2021.650609)
Supplement: Supplementary Figure 1 — PRISMA diagram of the literature filtering process. [file Data_Sheet_1.zip › Supplementary Table 2.xlsx]

## Sheet: TD def
Phylum versus clase
Etiquetas de fila	Cuenta de Phylum	Cuenta de Class	Cuenta de Family
Actinobacteria	292	292	292
Actinobacteria	292	292	292
Actinomycetales	27	27	27
Brevibacteriaceae	1	1	1
Cellulomonadaceae	8	8	8
Conexibacteraceae	1	1	1
Intrasporangiaceae	21	21	21
Kineosporiaceae	1	1	1
Microbacteriaceae	70	70	70
Micrococcaceae	43	43	43
Micromonosporaceae	1	1	1
Mycobacteriaceae	23	23	23
Nocardiaceae	23	23	23
Nocardioidaceae	29	29	29
Promicromonosporaceae	3	3	3
Streptomycetaceae	40	40	40
Williamsiaceae	1	1	1
Bacteroidetes	49	49	49
Cytophagia	7	7	7
Cytophagaceae	7	7	7
Flavobacteriia	22	22	22
Flavobacteriaceae	22	22	22
Sphingobacteriia	8	8	8
Sphingobacteriaceae	8	8	8
Chitinophagia	12	12	12
Chitinophagaceae	12	12	12
Firmicutes	263	263	263
Bacilli	263	263	263
Bacillaceae	204	204	204
Paenibacillaceae	33	33	33
Planococcaceae	17	17	17
Staphylococcaceae	9	9	9
Proteobacteria	728	728	728
Alphaproteobacteria	362	362	362
Bradyrhizobiaceae	12	12	12
Brucellaceae	8	8	8
Caulobacteraceae	30	30	30
Erythrobacteraceae	4	4	4
Hyphomicrobiaceae	12	12	12
Methylobacteriaceae	16	16	16
Phyllobacteriaceae	18	18	18
Rhizobiaceae	185	185	185
Sneathiellaceae	1	1	1
Sphingomonadaceae	62	62	62
Xanthobacteraceae	2	2	2
Xanthomonadaceae	12	12	12
Betaproteobacteria	97	97	97
Alcaligenaceae	6	6	6
Burkholderiaceae	17	17	17
Comamonadaceae	51	51	51
Neisseriaceae	1	1	1
Oxalobacteraceae	18	18	18
Ralstoniaceae	3	3	3
Unclassified	1	1	1
Gammaproteobacteria	269	269	269
Aeromonadaceae	2	2	2
Enterobacteriaceae	14	14	14
Moraxellaceae	7	7	7
Pseudomonadaceae	73	73	73
Rhodanobacteraceae	8	8	8
Xanthomonadaceae	164	164	164
Yersiniaceae	1	1	1
unclassified	61	61	61
unclassified	61	61	61
Unclassified	61	61	61
(en blanco)
(en blanco)
(en blanco)
Total general	1393	1393	1393

## Sheet: Bacteria
Ref	SynCom	Strain no.	Domain	SynCom Size	Phylum	Class	Order	Family	Genus	Species	Strain
Ijaz 2019	1	1	Bacteria	3	Firmicutes	Bacilli	Bacillales	Bacillaceae	Bacillus		BTH-11
Ijaz 2019	1	2	Bacteria	3	Proteobacteria	Gammaproteobacteria	Pseudomonadales	Pseudomonadaceae	Pseudomonas		MTH-1
Ijaz 2019	1	3	Bacteria	3	Proteobacteria	Gammaproteobacteria	Pseudomonadales	Pseudomonadaceae	Pseudomonas		THM-5
Lee 2020	1	1	Bacteria	4	Actinobacteria	Actinobacteria	Actinomycetales	Brevibacteriaceae	Brevibacterium	frigoritolerans
Lee 2020	1	2	Bacteria	4	Firmicutes	Bacilli	Bacillales	Bacillaceae	Bacillus	niacini
Lee 2020	1	3	Bacteria	4	Firmicutes	Bacilli	Bacillales	Planococcaceae	Solibacillus	silvestris
Lee 2020	1	4	Bacteria	4	Firmicutes	Bacilli	Bacillales	Bacillaceae	Bacillus	luciferensis
Santhanam 2019	1	1	Bacteria	5	Actinobacteria	Actinobacteria	Actinomycetales	Micrococcaceae	Arthrobacter	nitroguajacolicus	E46
Santhanam 2019	1	2	Bacteria	5	Firmicutes	Bacilli	Bacillales	Bacillaceae	Bacillus	megaterium	B55
Santhanam 2019	1	3	Bacteria	5	Firmicutes	Bacilli	Bacillales	Bacillaceae	Bacillus	mojavensis	K1
Santhanam 2019	1	4	Bacteria	5	Proteobacteria	Gammaproteobacteria	Pseudomonadales	Pseudomonadaceae	Pseudomonas	azotoformans	A70
Santhanam 2019	1	5	Bacteria	5	Proteobacteria	Gammaproteobacteria	Pseudomonadales	Pseudomonadaceae	Pseudomonas	frederiksbergensis	A176
Vrieze 2018	1	1	Bacteria	5	Proteobacteria	Gammaproteobacteria	Pseudomonadales	Pseudomonadaceae	Pseudomonas	putida
Vrieze 2018	1	2	Bacteria	5	Proteobacteria	Gammaproteobacteria	Pseudomonadales	Pseudomonadaceae	Pseudomonas	chlororaphis
Vrieze 2018	1	3	Bacteria	5	Proteobacteria	Gammaproteobacteria	Pseudomonadales	Pseudomonadaceae	Pseudomonas	frederiksbergensis
Vrieze 2018	1	4	Bacteria	5	Proteobacteria	Gammaproteobacteria	Pseudomonadales	Pseudomonadaceae	Pseudomonas	fluorescens
Vrieze 2018	1	5	Bacteria	5	Proteobacteria	Gammaproteobacteria	Pseudomonadales	Pseudomonadaceae	Pseudomonas	fluorescens
Sánchez-Gorostiaga 2019	1	1	Bacteria	6	Firmicutes	Bacilli	Bacillales	Bacillaceae	Bacillus	cereus
Sánchez-Gorostiaga 2019	1	2	Bacteria	6	Firmicutes	Bacilli	Bacillales	Bacillaceae	Bacillus	megaterium
Sánchez-Gorostiaga 2019	1	3	Bacteria	6	Firmicutes	Bacilli	Bacillales	Bacillaceae	Bacillus	mojavensis
Sánchez-Gorostiaga 2019	1	4	Bacteria	6	Firmicutes	Bacilli	Bacillales	Bacillaceae	Bacillus	polymyxa
Sánchez-Gorostiaga 2019	1	5	Bacteria	6	Firmicutes	Bacilli	Bacillales	Bacillaceae	Bacillus	subtilis
Sánchez-Gorostiaga 2019	1	6	Bacteria	6	Firmicutes	Bacilli	Bacillales	Bacillaceae	Bacillus	thuringiensis
Niu 2018	1	1	Bacteria	7	Proteobacteria	Gammaproteobacteria	Xanthomonadales	Xanthomonadaceae	Stenotrophomonas	maltophilia	ZK5342
Niu 2018	1	2	Bacteria	7	Proteobacteria	Alphaproteobacteria	Rhizobiales	Brucellaceae	Ochrobactrum	pituitosum	ZK5343
Niu 2018	1	3	Bacteria	7	Actinobacteria	Actinobacteria	Actinomycetales	Microbacteriaceae	Curtobacterium	pusillum	ZK5344
Niu 2018	1	4	Bacteria	7	Proteobacteria	Gammaproteobacteria	Enterobacterales	Enterobacteriaceae	Enterobacter	cloacae	ZK5345
Niu 2018	1	5	Bacteria	7	Bacteroidetes	Flavobacteriia	Flavobacteriales	Flavobacteriaceae	Chryseobacterium	indologenes	ZK5346
Niu 2018	1	6	Bacteria	7	Proteobacteria	Betaproteobacteria	Burkholderiales	Oxalobacteraceae	Herbaspirillum	frisingense	ZK5347
Niu 2018	1	7	Bacteria	7	Proteobacteria	Gammaproteobacteria	Pseudomonadales	Pseudomonadaceae	Pseudomonas	putida	ZK5348
Zhang 2019	1	1	Bacteria	7	Actinobacteria	Actinobacteria	Actinomycetales	Nocardiaceae	Nocardioides		R1281
Zhang 2019	1	2	Bacteria	7	Actinobacteria	Actinobacteria	Actinomycetales	Micromonosporaceae	Micromonospora		R1398
Zhang 2019	1	3	Bacteria	7	Actinobacteria	Actinobacteria	Actinomycetales	Cellulomonadaceae	Cellulomonas		R1417
Zhang 2019	1	4	Bacteria	7	Actinobacteria	Actinobacteria	Actinomycetales	Streptomycetaceae	Streptomyces		R1522
Zhang 2019	1	5	Bacteria	7	Actinobacteria	Actinobacteria	Actinomycetales	Intrasporangiaceae	Tetrasphaera		R2217a
Zhang 2019	1	6	Bacteria	7	Actinobacteria	Actinobacteria	Solirubrobacterales	Conexibacteraceae	Conexibacter		R1608
Zhang 2019	1	7	Bacteria	7	Firmicutes	Bacilli	Bacillales	Bacillaceae	Bacillus		R1383
Zhang 2019	1	8	Bacteria	7	Firmicutes	Bacilli	Bacillales	Bacillaceae	Bacillus		R1535
Zhang 2019	1	9	Bacteria	7	Firmicutes	Bacilli	Bacillales	Bacillaceae	Bacillus		R2027
Zhang 2019	1	10	Bacteria	7	Firmicutes	Bacilli	Bacillales	Bacillaceae	Bacillus		R2078b
Zhang 2019	1	11	Bacteria	7	Proteobacteria	Alphaproteobacteria	Caulobacterales	Caulobacteraceae	Phenylobacterium		R1418
Zhang 2019	1	12	Bacteria	7	Proteobacteria	Alphaproteobacteria	Caulobacterales	Caulobacteraceae	Asticcacaulis		R1388b
Zhang 2019	1	13	Bacteria	7	Proteobacteria	Alphaproteobacteria	Rhizobiales	Hyphomicrobiaceae	Devosia		R1396
Zhang 2019	1	14	Bacteria	7	Proteobacteria	Alphaproteobacteria	Rhizobiales	Hyphomicrobiaceae	Devosia		R1889
Zhang 2019	1	15	Bacteria	7	Proteobacteria	Alphaproteobacteria	Rhizobiales	Rhizobiaceae	Rhizobium		R115
Zhang 2019	1	16	Bacteria	7	Proteobacteria	Alphaproteobacteria	Rhizobiales	Xanthobacteraceae	Pseudolabrys		R992
Zhang 2019	1	17	Bacteria	7	Proteobacteria	Betaproteobacteria	Burkholderiales	Comamonadaceae	Acidovorax		R3
Zhang 2019	1	18	Bacteria	7	Proteobacteria	Betaproteobacteria	Burkholderiales	Oxalobacteraceae	Herbaspirillum		R1515
Zhang 2019	1	19	Bacteria	7	Proteobacteria	Betaproteobacteria	Burkholderiales	Unclassified	Piscinibacter		R1287
Zhang 2019	1	20	Bacteria	7	Proteobacteria	Betaproteobacteria	Neisseriales	Neisseriaceae	Vogesella
Zheng 2019	1	1	Bacteria	7	Actinobacteria	Actinobacteria	Actinomycetales	Micrococcaceae	Arthrobacter	defluvii	06-OD12
Zheng 2019	1	2	Bacteria	7	Actinobacteria	Actinobacteria	Actinomycetales	Streptomycetaceae	Streptomyces	prasinopilosus	34-Y1
Zheng 2019	1	3	Bacteria	7	Firmicutes	Bacilli	Bacillales	Bacillaceae	Bacillus	megaterium	CS22
Zheng 2019	1	4	Bacteria	7	Proteobacteria	Betaproteobacteria	Burkholderiales	Burkholderiaceae	Burkholderia	cepacia	51-Y1415
Zheng 2019	1	5	Bacteria	7	Proteobacteria	Betaproteobacteria	Burkholderiales	Comamonadaceae	Variovorax	paradoxus	19-D4
Zheng 2019	1	6	Bacteria	7	Proteobacteria	Gammaproteobacteria	Pseudomonadales	Pseudomonadaceae	Pseudomonas	frederiksbergensis	11-D3
Zheng 2019	1	7	Bacteria	7	Proteobacteria	Gammaproteobacteria	Xanthomonadales	Xanthomonadaceae	Rhodanobacter		25-Y8
Zhuang 2020	1	1	Bacteria	7	Firmicutes	Bacilli	Bacillales	Bacillaceae	Bacillus	simplex	B8-7
Zhuang 2020	1	2	Bacteria	7	Proteobacteria	Gammaproteobacteria	Pseudomonadales	Pseudomonadaceae	Pseudomonas	cedrina	P3-7
Zhuang 2020	1	3	Bacteria	7	Proteobacteria	Gammaproteobacteria	Pseudomonadales	Pseudomonadaceae	Pseudomonas	baetica	P3-22
Zhuang 2020	1	4	Bacteria	7	Proteobacteria	Gammaproteobacteria	Pseudomonadales	Pseudomonadaceae	Pseudomonas	migulae	P6-3
Zhuang 2020	1	5	Bacteria	7	Proteobacteria	Gammaproteobacteria	Pseudomonadales	Pseudomonadaceae	Pseudomonas	fluorescens	P6-33
Zhuang 2020	1	6	Bacteria	7	Proteobacteria	Gammaproteobacteria	Pseudomonadales	Pseudomonadaceae	Pseudomonas	reinekei	P7-5
Zhuang 2020	1	7	Bacteria	7	Proteobacteria	Gammaproteobacteria	Pseudomonadales	Pseudomonadaceae	Pseudomonas	frederiksbergensis	P7-14
Hu 2016	1	1	Bacteria	8	Proteobacteria	Gammaproteobacteria	Pseudomonadales	Pseudomonadaceae	Pseudomonas	brassicacearum	Q8R1-96
Hu 2016	1	2	Bacteria	8	Proteobacteria	Gammaproteobacteria	Pseudomonadales	Pseudomonadaceae	Pseudomonas	fluorescens	1M1-96
Hu 2016	1	3	Bacteria	8	Proteobacteria	Gammaproteobacteria	Pseudomonadales	Pseudomonadaceae	Pseudomonas	fluorescens	F113
Hu 2016	1	4	Bacteria	8	Proteobacteria	Gammaproteobacteria	Pseudomonadales	Pseudomonadaceae	Pseudomonas	fluorescens	MVP1-4
Hu 2016	1	5	Bacteria	8	Proteobacteria	Gammaproteobacteria	Pseudomonadales	Pseudomonadaceae	Pseudomonas	fluorescens	Phl1C2
Hu 2016	1	6	Bacteria	8	Proteobacteria	Gammaproteobacteria	Pseudomonadales	Pseudomonadaceae	Pseudomonas	fluorescens	Q2-87
Hu 2016	1	7	Bacteria	8	Proteobacteria	Gammaproteobacteria	Pseudomonadales	Pseudomonadaceae	Pseudomonas	protegens	CHA0
Hu 2016	1	8	Bacteria	8	Proteobacteria	Gammaproteobacteria	Pseudomonadales	Pseudomonadaceae	Pseudomonas	protegens	Pf-5
Moccia 2020	1	1	Bacteria	10	Actinobacteria	Actinobacteria	Actinomycetales	Micrococcaceae	Arthrobacter		R85
Moccia 2020	1	2	Bacteria	10	Actinobacteria	Actinobacteria	Actinomycetales	Micrococcaceae	Micrococcus		R34
Moccia 2020	1	3	Bacteria	10	Actinobacteria	Actinobacteria	Actinomycetales	Micrococcaceae	Micrococcus		R36
Moccia 2020	1	4	Bacteria	10	Actinobacteria	Actinobacteria	Actinomycetales	Streptomycetaceae	Streptomyces		R81
Moccia 2020	1	5	Bacteria	10	Actinobacteria	Actinobacteria	Corynebacteriales	Williamsiaceae	Williamsia		R60
Moccia 2020	1	6	Bacteria	10	Firmicutes	Bacilli	Bacillales	Bacillaceae	Bacillus		R1
Moccia 2020	1	7	Bacteria	10	Firmicutes	Bacilli	Bacillales	Bacillaceae	Oceanobacillus		R79
Moccia 2020	1	8	Bacteria	10	Firmicutes	Bacilli	Bacillales	Bacillaceae	Oceanobacillus		R86
Moccia 2020	1	9	Bacteria	10	Firmicutes	Bacilli	Bacillales	Staphylococcaceae	Staphylococcus		R61
Moccia 2020	1	10	Bacteria	10	Proteobacteria	Gammaproteobacteria	Enterobacterales	Enterobacteriaceae	Pantoea		R4
Moronta Barrios 2018	1	1	Bacteria	10	Proteobacteria	Gammaproteobacteria	Pseudomonadales	Pseudomonadaceae	Pseudomonas		E1108
Moronta Barrios 2018	1	2	Bacteria	10	Proteobacteria	Gammaproteobacteria	Pseudomonadales	Pseudomonadaceae	Pseudomonas		E1205
Moronta Barrios 2018	1	3	Bacteria	10	Proteobacteria	Gammaproteobacteria	Pseudomonadales	Pseudomonadaceae	Pseudomonas		E1308
Moronta Barrios 2018	1	4	Bacteria	10	Proteobacteria	Gammaproteobacteria	Pseudomonadales	Pseudomonadaceae	Pseudomonas		E2333
Moronta Barrios 2018	1	5	Bacteria	10	Proteobacteria	Gammaproteobacteria	Aeromonadales	Aeromonadaceae	Aeromonas		E2102
Moronta Barrios 2018	1	6	Bacteria	10	Proteobacteria	Gammaproteobacteria	Aeromonadales	Aeromonadaceae	Aeromonas	veronii	E2205
Moronta Barrios 2018	1	7	Bacteria	10	Proteobacteria	Gammaproteobacteria	Enterobacterales	Yersiniaceae	Serratia		E2309
Moronta Barrios 2018	1	8	Bacteria	10	Firmicutes	Bacilli	Bacillales	Bacillaceae	Bacillus		E2315
Moronta Barrios 2018	1	9	Bacteria	10	Proteobacteria	Alphaproteobacteria	Rhizobiales	Rhizobiaceae	Rhizobium		E2321
Moronta Barrios 2018	1	10	Bacteria	10	Proteobacteria	Betaproteobacteria	Burkholderiales	Comamonadaceae	Delftia		E2330
Schulz-Bohm 2015	1	1	Bacteria	10	Proteobacteria	Betaproteobacteria	Burkholderiales	Alcaligenaceae	Achromobacter		58-38
Schulz-Bohm 2015	1	2	Bacteria	10	Proteobacteria	Alphaproteobacteria	Rhizobiales	Bradyrhizobiaceae	Bosea		AD132
Schulz-Bohm 2015	1	3	Bacteria	10	Proteobacteria	Betaproteobacteria	Burkholderiales	Burkholderiaceae	Burkholderia		AD024
Schulz-Bohm 2015	1	4	Bacteria	10	Proteobacteria	Gammaproteobacteria	Xanthomonadales	Xanthomonadaceae	Dyella		AD056
Schulz-Bohm 2015	1	5	Bacteria	10	Proteobacteria	Betaproteobacteria	Burkholderiales	Oxalobacteraceae	Janthinobacterium		AD080
Schulz-Bohm 2015	1	6	Bacteria	10	Actinobacteria	Actinobacteria	Micrococcales	Microbacteriaceae	Microbacterium		AD141
Schulz-Bohm 2015	1	7	Bacteria	10	Firmicutes	Bacilli	Bacillales	Paenibacillaceae	Paenibacillus		AD087
Schulz-Bohm 2015	1	8	Bacteria	10	Bacteroidetes	Sphingobacteriia	Sphingobacteriales	Sphingobacteriaceae	Pedobacter		V48
Schulz-Bohm 2015	1	9	Bacteria	10	Proteobacteria	Gammaproteobacteria	Pseudomonadales	Pseudomonadaceae	Pseudomonas		AD021
Schulz-Bohm 2015	1	10	Bacteria	10	Proteobacteria	Alphaproteobacteria	Rhizobiales	Rhizobiaceae	Rhizobium		45-29
Armanhi 2018	1	1	Bacteria	19	Proteobacteria	Betaproteobacteria	Burkholderiales	Comamonadaceae	Ottowia
Armanhi 2018	1	2	Bacteria	19	Proteobacteria	Alphaproteobacteria	Caulobacterales	Caulobacteraceae	Asticcacaulis
Armanhi 2018	1	3	Bacteria	19	Proteobacteria	Gammaproteobacteria	Enterobacterales	Enterobacteriaceae	Enterobacter
Armanhi 2018	1	4	Bacteria	19	Proteobacteria	Gammaproteobacteria	Enterobacterales	Enterobacteriaceae	Pantoea
Armanhi 2018	1	5	Bacteria	19	Actinobacteria	Actinobacteria	Micrococcales	Microbacteriaceae	Microbacterium
Armanhi 2018	1	6	Bacteria	19	Proteobacteria	Alphaproteobacteria	Rhizobiales	Bradyrhizobiaceae	Bosea
Armanhi 2018	1	7	Bacteria	19	Proteobacteria	Alphaproteobacteria	Rhizobiales	Rhizobiaceae	Rhizobium
Armanhi 2018	1	8	Bacteria	19	Proteobacteria	Alphaproteobacteria	Rhizobiales	Rhizobiaceae	Ensifer
Armanhi 2018	1	9	Bacteria	19	Bacteroidetes	Sphingobacteriia	Sphingobacteriales	Sphingobacteriaceae	Pedobacter
Armanhi 2018	1	10	Bacteria	19	Bacteroidetes	Sphingobacteriia	Sphingobacteriales	Sphingobacteriaceae	Pedobacter
Armanhi 2018	1	11	Bacteria	19	Bacteroidetes	Chitinophagia	Sphingobacteriales	Chitinophagaceae	Chitinophaga
Armanhi 2018	1	12	Bacteria	19	Proteobacteria	Alphaproteobacteria	Sphingomonadales	Sphingomonadaceae	Sphingomonas
Armanhi 2018	1	13	Bacteria	19	Actinobacteria	Actinobacteria	Streptomycetales	Streptomycetaceae	Streptomyces
Armanhi 2018	1	14	Bacteria	19	Proteobacteria	Gammaproteobacteria	Xanthomonadales	Xanthomonadaceae	Dyella
Armanhi 2018	1	15	Bacteria	19	Proteobacteria	Gammaproteobacteria	Xanthomonadales	Xanthomonadaceae	Dyella
Armanhi 2018	1	16	Bacteria	19	Proteobacteria	Gammaproteobacteria	Xanthomonadales	Xanthomonadaceae	Lysobacter
Armanhi 2018	1	17	Bacteria	19	Proteobacteria	Gammaproteobacteria	Xanthomonadales	Xanthomonadaceae	Stenotrophomonas
Armanhi 2018	1	18	Bacteria	19	Proteobacteria	Gammaproteobacteria	Xanthomonadales	Xanthomonadaceae	Stenotrophomonas
Armanhi 2018	1	19	Bacteria	19	Proteobacteria	Gammaproteobacteria	Xanthomonadales	Xanthomonadaceae	Pseudoxanthomonas
Voges 2019	1	1	Bacteria	22	Actinobacteria	Actinobacteria	Actinomycetales	Cellulomonadaceae	Cellulomonas		Root137
Voges 2019	1	2	Bacteria	22	Actinobacteria	Actinobacteria	Actinomycetales	Microbacteriaceae	Microbacterium		Root166
Voges 2019	1	3	Bacteria	22	Actinobacteria	Actinobacteria	Actinomycetales	Microbacteriaceae	Yonghaparkia		Root332
Voges 2019	1	4	Bacteria	22	Actinobacteria	Actinobacteria	Actinomycetales	Microbacteriaceae	Agromyces		Root1464
Voges 2019	1	5	Bacteria	22	Actinobacteria	Actinobacteria	Actinomycetales	Nocardioidaceae	Nocardioides		Root614
Voges 2019	1	6	Bacteria	22	Actinobacteria	Actinobacteria	Actinomycetales	Streptomycetaceae	Streptomyces		Root1310
Voges 2019	1	7	Bacteria	22	Actinobacteria	Actinobacteria	Micrococcales	Intrasporangiaceae	Janibacter		Root563
Voges 2019	1	8	Bacteria	22	Bacteroidetes	Flavobacteriia	Flavobacteriales	Flavobacteriaceae	Flavobacterium		Root186
Voges 2019	1	9	Bacteria	22	Firmicutes	Bacilli	Bacillales	Bacillaceae	Bacillus		Root11
Voges 2019	1	10	Bacteria	22	Firmicutes	Bacilli	Bacillales	Paenibacillaceae	Paenibacillus		Root444D2
Voges 2019	1	11	Bacteria	22	Proteobacteria	Alphaproteobacteria	Rhizobiales	Methylobacteriaceae	Methylobacterium		Root483D1
Voges 2019	1	12	Bacteria	22	Proteobacteria	Alphaproteobacteria	Rhizobiales	Rhizobiaceae	Rhizobium		Root149
Voges 2019	1	13	Bacteria	22	Proteobacteria	Alphaproteobacteria	Rhizobiales	Rhizobiaceae	Agrobacterium		Root491
Voges 2019	1	14	Bacteria	22	Proteobacteria	Alphaproteobacteria	Rhizobiales	Rhizobiaceae	Sinorhizobium		Root1312
Voges 2019	1	15	Bacteria	22	Proteobacteria	Alphaproteobacteria	Sphingomonadales	Sphingomonadaceae	Sphingopyxis		Root1497
Voges 2019	1	16	Bacteria	22	Proteobacteria	Betaproteobacteria	Burkholderiales	Comamonadaceae	Acidovorax		Root70
Voges 2019	1	17	Bacteria	22	Proteobacteria	Betaproteobacteria	Burkholderiales	Alcaligenaceae	Achromobacter		Root170
Voges 2019	1	18	Bacteria	22	Proteobacteria	Betaproteobacteria	Burkholderiales	Oxalobacteraceae	Herbaspirillum		Root189
Voges 2019	1	19	Bacteria	22	Proteobacteria	Gammaproteobacteria	Pseudomonadales	Pseudomonadaceae	Pseudomonas		Root9
Voges 2019	1	20	Bacteria	22	Proteobacteria	Gammaproteobacteria	Xanthomonadales	Xanthomonadaceae	Rhodanobacter		Root561
Voges 2019	1	21	Bacteria	22	Proteobacteria	Gammaproteobacteria	Xanthomonadales	Xanthomonadaceae	Pseudoxanthomonas		Root630
Voges 2019	1	22	Bacteria	22	Proteobacteria	Gammaproteobacteria	Pseudomonadales	Moraxellaceae	Acinetobacter		Root1280
CorreadeSouza 2019	1	1	Bacteria	25	Proteobacteria	Alphaproteobacteria	Rhizobiales	Rhizobiaceae	Agrobacterium		B08
CorreadeSouza 2019	1	2	Bacteria	25	Proteobacteria	Alphaproteobacteria	Rhizobiales	Rhizobiaceae	Agrobacterium		E09
CorreadeSouza 2019	1	3	Bacteria	25	Proteobacteria	Alphaproteobacteria	Caulobacterales	Caulobacteraceae	Asticcacaulis		F02
CorreadeSouza 2019	1	4	Bacteria	25	Proteobacteria	Betaproteobacteria	Burkholderiales	Burkholderiaceae	Burkholderia		A10
CorreadeSouza 2019	1	5	Bacteria	25	Proteobacteria	Gammaproteobacteria	Xanthomonadales	Xanthomonadaceae	Dyella		G12
CorreadeSouza 2019	1	6	Bacteria	25	Proteobacteria	Alphaproteobacteria	Rhizobiales	Rhizobiaceae	Ensifer		D05
CorreadeSouza 2019	1	7	Bacteria	25	Proteobacteria	Alphaproteobacteria	Rhizobiales	Rhizobiaceae	Ensifer		B04
CorreadeSouza 2019	1	8	Bacteria	25	Proteobacteria	Gammaproteobacteria	Enterobacterales	Enterobacteriaceae	Enterobacter		B02
CorreadeSouza 2019	1	9	Bacteria	25	Proteobacteria	Gammaproteobacteria	Enterobacterales	Enterobacteriaceae	Enterobacter		F08
CorreadeSouza 2019	1	10	Bacteria	25	Proteobacteria	Gammaproteobacteria	Enterobacterales	Enterobacteriaceae	Enterobacter		G08
CorreadeSouza 2019	1	11	Bacteria	25	Proteobacteria	Gammaproteobacteria	Enterobacterales	Enterobacteriaceae	Enterobacter		G12
CorreadeSouza 2019	1	12	Bacteria	25	Proteobacteria	Gammaproteobacteria	Enterobacterales	Enterobacteriaceae	Enterobacter		H03
CorreadeSouza 2019	1	13	Bacteria	25	Proteobacteria	Gammaproteobacteria	Xanthomonadales	Xanthomonadaceae	Lysobacter		A02
CorreadeSouza 2019	1	14	Bacteria	25	Actinobacteria	Actinobacteria	Actinomycetales	Microbacteriaceae	Microbacterium		C05
CorreadeSouza 2019	1	15	Bacteria	25	Proteobacteria	Gammaproteobacteria	Enterobacterales	Enterobacteriaceae	Pantoea		B02
CorreadeSouza 2019	1	16	Bacteria	25	Proteobacteria	Gammaproteobacteria	Enterobacterales	Enterobacteriaceae	Pantoea		C12
CorreadeSouza 2019	1	17	Bacteria	25	Bacteroidetes	Sphingobacteriia	Sphingobacteriales	Sphingobacteriaceae	Pedobacter		A01
CorreadeSouza 2019	1	18	Bacteria	25	Bacteroidetes	Sphingobacteriia	Sphingobacteriales	Sphingobacteriaceae	Pedobacter		B08
CorreadeSouza 2019	1	19	Bacteria	25	Proteobacteria	Alphaproteobacteria	Sphingomonadales	Sphingomonadaceae	Sphingomonas		D05
CorreadeSouza 2019	1	20	Bacteria	25	Proteobacteria	Gammaproteobacteria	Xanthomonadales	Xanthomonadaceae	Stenotrophomonas		B02
CorreadeSouza 2019	1	21	Bacteria	25	Proteobacteria	Gammaproteobacteria	Xanthomonadales	Xanthomonadaceae	Stenotrophomonas		E09
CorreadeSouza 2019	1	22	Bacteria	25	Actinobacteria	Actinobacteria	Actinomycetales	Streptomycetaceae	Streptomyces		G01
CorreadeSouza 2019	1	23	Bacteria	25	Proteobacteria	Alphaproteobacteria	Rhizobiales	Bradyrhizobiaceae			C05
CorreadeSouza 2019	1	24	Bacteria	25	Proteobacteria	Gammaproteobacteria	Xanthomonadales	Xanthomonadaceae			G08
CorreadeSouza 2019	1	25	Bacteria	25	Proteobacteria	Betaproteobacteria	Burkholderiales	Comamonadaceae	Variovorax		F04
Tsolakidou 2019	2	1	Bacteria	25	Firmicutes	Bacilli	Bacillales	Bacillaceae	Bacillus	chandigarhensis	3Ba3
Tsolakidou 2019	1	1	Bacteria	25	Proteobacteria	Alphaproteobacteria	Rhizobiales	Rhizobiaceae	Agrobacterium	tumefaciens	2Ba4
Tsolakidou 2019	1	2	Bacteria	25	Firmicutes	Bacilli	Bacillales	Bacillaceae	Bacillus	endophyticus	1Ba2
Tsolakidou 2019	2	2	Bacteria	25	Firmicutes	Bacilli	Bacillales	Bacillaceae	Bacillus	endophyticus	1Ba2
Tsolakidou 2019	1	3	Bacteria	25	Firmicutes	Bacilli	Bacillales	Bacillaceae	Bacillus	humi	3Ba30
Tsolakidou 2019	2	3	Bacteria	25	Firmicutes	Bacilli	Bacillales	Bacillaceae	Bacillus	endophyticus	3Ba21
Tsolakidou 2019	1	4	Bacteria	25	Firmicutes	Bacilli	Bacillales	Bacillaceae	Bacillus	licheniformis	3Ba17
Tsolakidou 2019	2	4	Bacteria	25	Firmicutes	Bacilli	Bacillales	Bacillaceae	Bacillus	humi	1Ba28
Tsolakidou 2019	1	5	Bacteria	25	Firmicutes	Bacilli	Bacillales	Bacillaceae	Bacillus	licheniformis	3Ba9
Tsolakidou 2019	2	5	Bacteria	25	Firmicutes	Bacilli	Bacillales	Bacillaceae	Bacillus	humi	1Ba43
Tsolakidou 2019	1	6	Bacteria	25	Firmicutes	Bacilli	Bacillales	Bacillaceae	Bacillus	firmus	2Ba55
Tsolakidou 2019	2	6	Bacteria	25	Firmicutes	Bacilli	Bacillales	Bacillaceae	Bacillus	humi	3Ba30
Tsolakidou 2019	1	7	Bacteria	25	Firmicutes	Bacilli	Bacillales	Bacillaceae	Bacillus	firmus	2Ba2
Tsolakidou 2019	2	7	Bacteria	25	Firmicutes	Bacilli	Bacillales	Bacillaceae	Bacillus	licheniformis	1Ba18
Tsolakidou 2019	1	8	Bacteria	25	Firmicutes	Bacilli	Bacillales	Bacillaceae	Bacillus	niacini	1Ba10
Tsolakidou 2019	2	8	Bacteria	25	Firmicutes	Bacilli	Bacillales	Bacillaceae	Bacillus	licheniformis	3Ba16
Tsolakidou 2019	1	9	Bacteria	25	Firmicutes	Bacilli	Bacillales	Bacillaceae	Bacillus		2Ba43
Tsolakidou 2019	2	9	Bacteria	25	Firmicutes	Bacilli	Bacillales	Bacillaceae	Bacillus	licheniformis	3Ba17
Tsolakidou 2019	2	10	Bacteria	25	Firmicutes	Bacilli	Bacillales	Bacillaceae	Bacillus	licheniformis	3Ba20
Tsolakidou 2019	1	10	Bacteria	25	Bacteroidetes	Flavobacteriia	Flavobacteriales	Flavobacteriaceae	Chryseobacterium		2Ba19
Tsolakidou 2019	2	11	Bacteria	25	Firmicutes	Bacilli	Bacillales	Bacillaceae	Bacillus	licheniformis	3Ba28
Tsolakidou 2019	1	11	Bacteria	25	Bacteroidetes	Flavobacteriia	Flavobacteriales	Flavobacteriaceae	Chryseobacterium	wanjuense	2Ba46s
Tsolakidou 2019	2	12	Bacteria	25	Firmicutes	Bacilli	Bacillales	Bacillaceae	Bacillus	licheniformis	3Ba44
Tsolakidou 2019	1	12	Bacteria	25	Proteobacteria	Gammaproteobacteria	Enterobacterales	Enterobacteriaceae	Enterobacter	cloacae	2Ba30
Tsolakidou 2019	2	13	Bacteria	25	Firmicutes	Bacilli	Bacillales	Bacillaceae	Bacillus	licheniformis	3Ba45
Tsolakidou 2019	1	13	Bacteria	25	Proteobacteria	Gammaproteobacteria	Xanthomonadales	Xanthomonadaceae	Luteimonas	mephitis	1Ba33
Tsolakidou 2019	2	14	Bacteria	25	Firmicutes	Bacilli	Bacillales	Bacillaceae	Bacillus	licheniformis	3Ba46
Tsolakidou 2019	1	14	Bacteria	25	Actinobacteria	Actinobacteria	Actinomycetales	Microbacteriaceae	Microbacterium	foliorum	1Ba13
Tsolakidou 2019	2	15	Bacteria	25	Firmicutes	Bacilli	Bacillales	Bacillaceae	Bacillus	licheniformis	3Ba9
Tsolakidou 2019	1	15	Bacteria	25	Actinobacteria	Actinobacteria	Actinomycetales	Microbacteriaceae	Microbacterium	foliorum	2Ba37
Tsolakidou 2019	2	16	Bacteria	25	Firmicutes	Bacilli	Bacillales	Bacillaceae	Bacillus	megaterium	1Ba20
Tsolakidou 2019	1	16	Bacteria	25	Actinobacteria	Actinobacteria	Actinomycetales	Microbacteriaceae	Microbacterium		1Ba51
Tsolakidou 2019	2	17	Bacteria	25	Firmicutes	Bacilli	Bacillales	Bacillaceae	Bacillus	subtilis	1Ba19
Tsolakidou 2019	1	17	Bacteria	25	Actinobacteria	Actinobacteria	Actinomycetales	Microbacteriaceae	Microbacterium	esteraromaticum	3Ba33
Tsolakidou 2019	2	18	Bacteria	25	Firmicutes	Bacilli	Bacillales	Bacillaceae	Bacillus	subtilis	2Ba19s
Tsolakidou 2019	1	18	Bacteria	25	Proteobacteria	Alphaproteobacteria	Rhizobiales	Brucellaceae	Ochrobactrum		2Ba42
Tsolakidou 2019	2	19	Bacteria	25	Firmicutes	Bacilli	Bacillales	Bacillaceae	Bacillus	subtilis	CCS
Tsolakidou 2019	1	19	Bacteria	25	Proteobacteria	Alphaproteobacteria	Rhizobiales	Brucellaceae	Ochrobactrum		2Ba51
Tsolakidou 2019	2	20	Bacteria	25	Firmicutes	Bacilli	Bacillales	Bacillaceae	Bacillus	circulans	1Ba46
Tsolakidou 2019	1	20	Bacteria	25	Proteobacteria	Gammaproteobacteria	Pseudomonadales	Pseudomonadaceae	Pseudomonas	anguilliseptica	1Ba33
Tsolakidou 2019	2	21	Bacteria	25	Firmicutes	Bacilli	Bacillales	Bacillaceae	Bacillus	firmus	2Ba55
Tsolakidou 2019	1	21	Bacteria	25	Proteobacteria	Gammaproteobacteria	Pseudomonadales	Pseudomonadaceae	Pseudomonas	putida	3Ba4
Tsolakidou 2019	2	22	Bacteria	25	Firmicutes	Bacilli	Bacillales	Bacillaceae	Bacillus	foraminis	1Ba49
Tsolakidou 2019	1	22	Bacteria	25	Proteobacteria	Gammaproteobacteria	Xanthomonadales	Xanthomonadaceae	Stenotrophomonas	maltophilia	1Ba16
Tsolakidou 2019	2	23	Bacteria	25	Firmicutes	Bacilli	Bacillales	Bacillaceae	Bacillus	niacini	1Ba10
Tsolakidou 2019	1	23	Bacteria	25	Proteobacteria	Gammaproteobacteria	Xanthomonadales	Xanthomonadaceae	Stenotrophomonas	maltophilia	2Ba27
Tsolakidou 2019	2	24	Bacteria	25	Firmicutes	Bacilli	Bacillales	Bacillaceae	Bacillus		2Ba43
Tsolakidou 2019	1	24	Bacteria	25	Proteobacteria	Gammaproteobacteria	Xanthomonadales	Xanthomonadaceae	Stenotrophomonas	maltophilia	2Ba50
Tsolakidou 2019	2	25	Bacteria	25	Firmicutes	Bacilli	Bacillales	Bacillaceae	Bacillus		3Ba35
Tsolakidou 2019	1	25	Bacteria	25	Proteobacteria	Gammaproteobacteria	Xanthomonadales	Xanthomonadaceae	Stenotrophomonas	maltophilia	2Ba32
Hu 2020	1	1	Bacteria	32	Actinobacteria	Actinobacteria	Actinobacteridae	Actinomycetales	Micrococcineae
Hu 2020	2	1	Bacteria	32	Actinobacteria	Actinobacteria	Actinobacteridae	Actinomycetales	Micrococcineae
Hu 2020	3	1	Bacteria	32	Actinobacteria	Actinobacteria	Actinobacteridae	Actinomycetales	Micrococcineae
Hu 2020	5	1	Bacteria	32	Actinobacteria	Actinobacteria	Actinobacteridae	Actinomycetales	Micrococcineae
Hu 2020	7	1	Bacteria	32	Actinobacteria	Actinobacteria	Actinobacteridae	Actinomycetales	Micrococcineae
Hu 2020	8	1	Bacteria	32	Actinobacteria	Actinobacteria	Actinobacteridae	Actinomycetales	Micrococcineae
Hu 2020	9	1	Bacteria	32	Actinobacteria	Actinobacteria	Actinobacteridae	Actinomycetales	Corynebacterineae
Hu 2020	10	1	Bacteria	32	Actinobacteria	Actinobacteria	Actinobacteridae	Actinomycetales	Micrococcineae
Hu 2020	11	1	Bacteria	32	Actinobacteria	Actinobacteria	Actinobacteridae	Actinomycetales	Micrococcineae
Hu 2020	12	1	Bacteria	32	Actinobacteria	Actinobacteria	Actinobacteridae	Actinomycetales	Micrococcineae
Hu 2020	4	1	Bacteria	32	Bacteroidetes	Chitinophagia	Sphingobacteriales	Chitinophagaceae	Chitinophaga
Hu 2020	6	1	Bacteria	32	Bacteroidetes	Cytophagia	Cytophagales	Cytophagaceae	Dyadobacter
Hu 2020	1	2	Bacteria	32	Actinobacteria	Actinobacteria	Actinobacteridae	Actinomycetales	Micrococcineae
Hu 2020	2	2	Bacteria	32	Actinobacteria	Actinobacteria	Actinobacteridae	Actinomycetales	Micrococcineae
Hu 2020	8	2	Bacteria	32	Actinobacteria	Actinobacteria	Actinobacteridae	Actinomycetales	Micrococcineae
Hu 2020	9	2	Bacteria	32	Actinobacteria	Actinobacteria	Actinobacteridae	Actinomycetales	Micrococcineae
Hu 2020	10	2	Bacteria	32	Actinobacteria	Actinobacteria	Actinobacteridae	Actinomycetales	Micrococcineae
Hu 2020	11	2	Bacteria	32	Actinobacteria	Actinobacteria	Actinobacteridae	Actinomycetales	Micrococcineae
Hu 2020	12	2	Bacteria	32	Actinobacteria	Actinobacteria	Actinobacteridae	Actinomycetales	Micrococcineae
Hu 2020	3	2	Bacteria	32	Firmicutes	Bacilli	Bacillales	Bacillaceae	Bacillus
Hu 2020	7	2	Bacteria	32	Firmicutes	Bacilli	Bacillales	Bacillaceae	Bacillus
Hu 2020	4	2	Bacteria	32	Bacteroidetes	Chitinophagia	Sphingobacteriales	Chitinophagaceae	Chitinophaga
Hu 2020	5	2	Bacteria	32	Bacteroidetes	Cytophagia	Cytophagales	Cytophagaceae	Dyadobacter
Hu 2020	6	2	Bacteria	32	Bacteroidetes	Cytophagia	Cytophagales	Cytophagaceae	Dyadobacter
Hu 2020	8	3	Bacteria	32	Actinobacteria	Actinobacteria	Actinobacteridae	Actinomycetales	Streptomycineae
Hu 2020	9	3	Bacteria	32	Actinobacteria	Actinobacteria	Actinobacteridae	Actinomycetales	Micrococcineae
Hu 2020	10	3	Bacteria	32	Actinobacteria	Actinobacteria	Actinobacteridae	Actinomycetales	Micrococcineae
Hu 2020	12	3	Bacteria	32	Actinobacteria	Actinobacteria	Actinobacteridae	Actinomycetales	Micrococcineae
Hu 2020	1	3	Bacteria	32	Firmicutes	Bacilli	Bacillales	Bacillaceae	Fictibacillus
Hu 2020	3	3	Bacteria	32	Firmicutes	Bacilli	Bacillales	Bacillaceae	Bacillus
Hu 2020	6	3	Bacteria	32	Firmicutes	Bacilli	Bacillales	Bacillaceae	Bacillus
Hu 2020	7	3	Bacteria	32	Firmicutes	Bacilli	Bacillales	Bacillaceae	Bacillus
Hu 2020	11	3	Bacteria	32	Firmicutes	Bacilli	Bacillales	Bacillaceae	Bacillus
Hu 2020	2	3	Bacteria	32	Bacteroidetes	Chitinophagia	Sphingobacteriales	Chitinophagaceae	Terrimonas
Hu 2020	4	3	Bacteria	32	Bacteroidetes	Chitinophagia	Sphingobacteriales	Chitinophagaceae	Chitinophaga
Hu 2020	5	3	Bacteria	32	Bacteroidetes	Cytophagia	Cytophagales	Cytophagaceae	Dyadobacter
Hu 2020	9	4	Bacteria	32	Actinobacteria	Actinobacteria	Actinobacteridae	Actinomycetales	Micrococcineae
Hu 2020	10	4	Bacteria	32	Actinobacteria	Actinobacteria	Actinobacteridae	Actinomycetales	Micrococcineae
Hu 2020	12	4	Bacteria	32	Actinobacteria	Actinobacteria	Actinobacteridae	Actinomycetales	Micrococcineae
Hu 2020	1	4	Bacteria	32	Firmicutes	Bacilli	Bacillales	Bacillaceae	Bacillus
Hu 2020	2	4	Bacteria	32	Firmicutes	Bacilli	Bacillales	Bacillaceae	Bacillus
Hu 2020	3	4	Bacteria	32	Firmicutes	Bacilli	Bacillales	Bacillaceae	Bacillus
Hu 2020	6	4	Bacteria	32	Firmicutes	Bacilli	Bacillales	Bacillaceae	Bacillus
Hu 2020	7	4	Bacteria	32	Firmicutes	Bacilli	Bacillales	Bacillaceae	Bacillus
Hu 2020	8	4	Bacteria	32	Firmicutes	Bacilli	Bacillales	Bacillaceae	Bacillus
Hu 2020	11	4	Bacteria	32	Firmicutes	Bacilli	Bacillales	Bacillaceae	Bacillus
Hu 2020	4	4	Bacteria	32	Bacteroidetes	Chitinophagia	Sphingobacteriales	Chitinophagaceae	Chitinophaga
Hu 2020	5	4	Bacteria	32	Bacteroidetes	Cytophagia	Cytophagales	Cytophagaceae	Dyadobacter
Hu 2020	12	5	Bacteria	32	Actinobacteria	Actinobacteria	Actinobacteridae	Actinomycetales	Micrococcineae
Hu 2020	1	5	Bacteria	32	Firmicutes	Bacilli	Bacillales	Bacillaceae	Bacillus
Hu 2020	2	5	Bacteria	32	Firmicutes	Bacilli	Bacillales	Bacillaceae	Bacillus
Hu 2020	3	5	Bacteria	32	Firmicutes	Bacilli	Bacillales	Bacillaceae	Bacillus
Hu 2020	6	5	Bacteria	32	Firmicutes	Bacilli	Bacillales	Bacillaceae	Bacillus
Hu 2020	7	5	Bacteria	32	Firmicutes	Bacilli	Bacillales	Bacillaceae	Bacillus
Hu 2020	8	5	Bacteria	32	Firmicutes	Bacilli	Bacillales	Bacillaceae	Bacillus
Hu 2020	9	5	Bacteria	32	Firmicutes	Bacilli	Bacillales	Bacillaceae	Bacillus
Hu 2020	10	5	Bacteria	32	Firmicutes	Bacilli	Bacillales	Bacillaceae	Bacillus
Hu 2020	11	5	Bacteria	32	Firmicutes	Bacilli	Bacillales	Bacillaceae	Bacillus
Hu 2020	4	5	Bacteria	32	Bacteroidetes	Chitinophagia	Sphingobacteriales	Chitinophagaceae	Chitinophaga
Hu 2020	5	5	Bacteria	32	Bacteroidetes	Chitinophagia	Sphingobacteriales	Chitinophagaceae	Flavihumibacter
Hu 2020	12	6	Bacteria	32	Actinobacteria	Actinobacteria	Actinobacteridae	Actinomycetales	Micrococcineae
Hu 2020	1	6	Bacteria	32	Firmicutes	Bacilli	Bacillales	Bacillaceae	Bacillus
Hu 2020	2	6	Bacteria	32	Firmicutes	Bacilli	Bacillales	Bacillaceae	Bacillus
Hu 2020	3	6	Bacteria	32	Firmicutes	Bacilli	Bacillales	Bacillaceae	Falsibacillus
Hu 2020	4	6	Bacteria	32	Firmicutes	Bacilli	Bacillales	Bacillaceae	Bacillus
Hu 2020	5	6	Bacteria	32	Firmicutes	Bacilli	Bacillales	Bacillaceae	Bacillus
Hu 2020	6	6	Bacteria	32	Firmicutes	Bacilli	Bacillales	Bacillaceae	Bacillus
Hu 2020	7	6	Bacteria	32	Firmicutes	Bacilli	Bacillales	Bacillaceae	Falsibacillus
Hu 2020	8	6	Bacteria	32	Firmicutes	Bacilli	Bacillales	Bacillaceae	Bacillus
Hu 2020	9	6	Bacteria	32	Firmicutes	Bacilli	Bacillales	Bacillaceae	Fictibacillus
Hu 2020	10	6	Bacteria	32	Firmicutes	Bacilli	Bacillales	Bacillaceae	Bacillus
Hu 2020	11	6	Bacteria	32	Firmicutes	Bacilli	Bacillales	Bacillaceae	Bacillus
Hu 2020	12	7	Bacteria	32	Actinobacteria	Actinobacteria	Actinobacteridae	Actinomycetales	Micrococcineae
Hu 2020	1	7	Bacteria	32	Firmicutes	Bacilli	Bacillales	Bacillaceae	Bacillus
Hu 2020	2	7	Bacteria	32	Firmicutes	Bacilli	Bacillales	Bacillaceae	Bacillus
Hu 2020	3	7	Bacteria	32	Firmicutes	Bacilli	Bacillales	Bacillaceae	Falsibacillus
Hu 2020	4	7	Bacteria	32	Firmicutes	Bacilli	Bacillales	Bacillaceae	Bacillus
Hu 2020	5	7	Bacteria	32	Firmicutes	Bacilli	Bacillales	Bacillaceae	Bacillus
Hu 2020	6	7	Bacteria	32	Firmicutes	Bacilli	Bacillales	Bacillaceae	Bacillus
Hu 2020	7	7	Bacteria	32	Firmicutes	Bacilli	Bacillales	Bacillaceae	Falsibacillus
Hu 2020	8	7	Bacteria	32	Firmicutes	Bacilli	Bacillales	Bacillaceae	Bacillus
Hu 2020	9	7	Bacteria	32	Firmicutes	Bacilli	Bacillales	Bacillaceae	Fictibacillus
Hu 2020	10	7	Bacteria	32	Firmicutes	Bacilli	Bacillales	Bacillaceae	Salirhabdus
Hu 2020	11	7	Bacteria	32	Proteobacteria	Alphaproteobacteria	Rhizobiales	Rhizobiaceae	Ensifer
Hu 2020	1	8	Bacteria	32	Firmicutes	Bacilli	Bacillales	Bacillaceae	Bacillus
Hu 2020	2	8	Bacteria	32	Firmicutes	Bacilli	Bacillales	Bacillaceae	Bacillus
Hu 2020	4	8	Bacteria	32	Firmicutes	Bacilli	Bacillales	Bacillaceae	Bacillus
Hu 2020	5	8	Bacteria	32	Firmicutes	Bacilli	Bacillales	Bacillaceae	Bacillus
Hu 2020	6	8	Bacteria	32	Firmicutes	Bacilli	Bacillales	Bacillaceae	Bacillus
Hu 2020	7	8	Bacteria	32	Firmicutes	Bacilli	Bacillales	Bacillaceae	Fictibacillus
Hu 2020	8	8	Bacteria	32	Firmicutes	Bacilli	Bacillales	Bacillaceae	Bacillus
Hu 2020	12	8	Bacteria	32	Bacteroidetes	Chitinophagia	Sphingobacteriales	Chitinophagaceae	Parasegetibacter
Hu 2020	3	8	Bacteria	32	Proteobacteria	Alphaproteobacteria	Sphingomonadales	Erythrobacteraceae	Erythromicrobium
Hu 2020	9	8	Bacteria	32	Proteobacteria	Alphaproteobacteria	Sphingomonadales	Erythrobacteraceae	Altererythrobacter
Hu 2020	10	8	Bacteria	32	Proteobacteria	Alphaproteobacteria	Sphingomonadales	Sphingomonadaceae	Sphingobium
Hu 2020	11	8	Bacteria	32	Proteobacteria	Gammaproteobacteria	Xanthomonadales	Xanthomonadaceae	Arenimonas
Hu 2020	1	9	Bacteria	32	Firmicutes	Bacilli	Bacillales	Bacillaceae	Bacillus
Hu 2020	2	9	Bacteria	32	Firmicutes	Bacilli	Bacillales	Bacillaceae	Bacillus
Hu 2020	4	9	Bacteria	32	Firmicutes	Bacilli	Bacillales	Bacillaceae	Bacillus
Hu 2020	5	9	Bacteria	32	Firmicutes	Bacilli	Bacillales	Bacillaceae	Bacillus
Hu 2020	6	9	Bacteria	32	Firmicutes	Bacilli	Bacillales	Bacillaceae	Fictibacillus
Hu 2020	7	9	Bacteria	32	Firmicutes	Bacilli	Bacillales	Bacillaceae	Fictibacillus
Hu 2020	8	9	Bacteria	32	Firmicutes	Bacilli	Bacillales	Bacillaceae	Falsibacillus
Hu 2020	9	9	Bacteria	32	Proteobacteria	Alphaproteobacteria	Sphingomonadales	Erythrobacteraceae	Erythromicrobium
Hu 2020	10	9	Bacteria	32	Proteobacteria	Alphaproteobacteria	Sphingomonadales	Sphingomonadaceae	Sphingomonas
Hu 2020	12	9	Bacteria	32	Proteobacteria	Alphaproteobacteria	Sphingomonadales	Sphingomonadaceae	Sphingobium
Hu 2020	3	9	Bacteria	32	Proteobacteria	Gammaproteobacteria	Xanthomonadales	Xanthomonadaceae	Arenimonas
Hu 2020	11	9	Bacteria	32	Proteobacteria	Gammaproteobacteria	Xanthomonadales	Xanthomonadaceae	Lysobacter
Hu 2020	1	10	Bacteria	32	Firmicutes	Bacilli	Bacillales	Bacillaceae	Bacillus
Hu 2020	2	10	Bacteria	32	Firmicutes	Bacilli	Bacillales	Bacillaceae	Bacillus
Hu 2020	4	10	Bacteria	32	Firmicutes	Bacilli	Bacillales	Bacillaceae	Bacillus
Hu 2020	5	10	Bacteria	32	Firmicutes	Bacilli	Bacillales	Bacillaceae	Bacillus
Hu 2020	6	10	Bacteria	32	Firmicutes	Bacilli	Bacillales	Bacillaceae	Fictibacillus
Hu 2020	7	10	Bacteria	32	Firmicutes	Bacilli	Bacillales	Bacillaceae	Fictibacillus
Hu 2020	8	10	Bacteria	32	Firmicutes	Bacilli	Bacillales	Bacillaceae	Fictibacillus
Hu 2020	9	10	Bacteria	32	Proteobacteria	Alphaproteobacteria	Sphingomonadales	Sphingomonadaceae	Rhizorhapis
Hu 2020	10	10	Bacteria	32	Proteobacteria	Alphaproteobacteria	Sphingomonadales	Sphingomonadaceae	Sphingopyxis
Hu 2020	12	10	Bacteria	32	Proteobacteria	Alphaproteobacteria	Sphingomonadales	Sphingomonadaceae	Sphingobium
Hu 2020	3	10	Bacteria	32	Proteobacteria	Gammaproteobacteria	Xanthomonadales	Xanthomonadaceae	Arenimonas
Hu 2020	11	10	Bacteria	32	Proteobacteria	Gammaproteobacteria	Xanthomonadales	Xanthomonadaceae	Lysobacter
Hu 2020	2	11	Bacteria	32	Firmicutes	Bacilli	Bacillales	Bacillaceae	Bacillus
Hu 2020	4	11	Bacteria	32	Firmicutes	Bacilli	Bacillales	Bacillaceae	Bacillus
Hu 2020	5	11	Bacteria	32	Firmicutes	Bacilli	Bacillales	Bacillaceae	Bacillus
Hu 2020	6	11	Bacteria	32	Firmicutes	Bacilli	Bacillales	Bacillaceae	Falsibacillus
Hu 2020	8	11	Bacteria	32	Firmicutes	Bacilli	Bacillales	Bacillaceae	Fictibacillus
Hu 2020	7	11	Bacteria	32	Firmicutes	Bacilli	Bacillales	Planococcaceae	Solibacillus
Hu 2020	1	11	Bacteria	32	Proteobacteria	Alphaproteobacteria	Sphingomonadales	Sphingomonadaceae	Sphingosinicella
Hu 2020	9	11	Bacteria	32	Proteobacteria	Alphaproteobacteria	Sphingomonadales	Sphingomonadaceae	Sphingobium
Hu 2020	10	11	Bacteria	32	Proteobacteria	Alphaproteobacteria	Sphingomonadales	Sphingomonadaceae	Sphingopyxis
Hu 2020	3	11	Bacteria	32	Proteobacteria	Gammaproteobacteria	Xanthomonadales	Xanthomonadaceae	Arenimonas
Hu 2020	11	11	Bacteria	32	Proteobacteria	Gammaproteobacteria	Xanthomonadales	Xanthomonadaceae	Lysobacter
Hu 2020	12	11	Bacteria	32	Proteobacteria	Gammaproteobacteria	Xanthomonadales	Xanthomonadaceae	Arenimonas
Hu 2020	2	12	Bacteria	32	Firmicutes	Bacilli	Bacillales	Bacillaceae	Fictibacillus
Hu 2020	4	12	Bacteria	32	Firmicutes	Bacilli	Bacillales	Bacillaceae	Bacillus
Hu 2020	5	12	Bacteria	32	Firmicutes	Bacilli	Bacillales	Bacillaceae	Bacillus
Hu 2020	6	12	Bacteria	32	Firmicutes	Bacilli	Bacillales	Bacillaceae	Fictibacillus
Hu 2020	8	12	Bacteria	32	Firmicutes	Bacilli	Bacillales	Paenibacillaceae	Paenibacillus
Hu 2020	7	12	Bacteria	32	Firmicutes	Bacilli	Bacillales	Planococcaceae	Solibacillus
Hu 2020	9	12	Bacteria	32	Proteobacteria	Alphaproteobacteria	Sphingomonadales	Sphingomonadaceae	Sphingobium
Hu 2020	1	12	Bacteria	32	Proteobacteria	Gammaproteobacteria	Xanthomonadales	Xanthomonadaceae	Arenimonas
Hu 2020	3	12	Bacteria	32	Proteobacteria	Gammaproteobacteria	Xanthomonadales	Xanthomonadaceae	Lysobacter
Hu 2020	10	12	Bacteria	32	Proteobacteria	Gammaproteobacteria	Xanthomonadales	Xanthomonadaceae	Arenimonas
Hu 2020	11	12	Bacteria	32	Proteobacteria	Gammaproteobacteria	Xanthomonadales	Xanthomonadaceae	Lysobacter
Hu 2020	12	12	Bacteria	32	Proteobacteria	Gammaproteobacteria	Xanthomonadales	Xanthomonadaceae	Arenimonas
Hu 2020	2	13	Bacteria	32	Firmicutes	Bacilli	Bacillales	Bacillaceae	Falsibacillus
Hu 2020	4	13	Bacteria	32	Firmicutes	Bacilli	Bacillales	Bacillaceae	Fictibacillus
Hu 2020	5	13	Bacteria	32	Firmicutes	Bacilli	Bacillales	Bacillaceae	Bacillus
Hu 2020	6	13	Bacteria	32	Firmicutes	Bacilli	Bacillales	Bacillaceae	Fictibacillus
Hu 2020	7	13	Bacteria	32	Firmicutes	Bacilli	Bacillales	Planococcaceae	Solibacillus
Hu 2020	8	13	Bacteria	32	Firmicutes	Bacilli	Bacillales	Planococcaceae	Lysinibacillus
Hu 2020	9	13	Bacteria	32	Proteobacteria	Alphaproteobacteria	Sphingomonadales	Sphingomonadaceae	Sphingobium
Hu 2020	1	13	Bacteria	32	Proteobacteria	Gammaproteobacteria	Xanthomonadales	Xanthomonadaceae	Lysobacter
Hu 2020	3	13	Bacteria	32	Proteobacteria	Gammaproteobacteria	Xanthomonadales	Xanthomonadaceae	Lysobacter
Hu 2020	10	13	Bacteria	32	Proteobacteria	Gammaproteobacteria	Xanthomonadales	Xanthomonadaceae	Luteimonas
Hu 2020	11	13	Bacteria	32	Proteobacteria	Gammaproteobacteria	Xanthomonadales	Xanthomonadaceae	Lysobacter
Hu 2020	12	13	Bacteria	32	Proteobacteria	Gammaproteobacteria	Xanthomonadales	Xanthomonadaceae	Arenimonas
Hu 2020	2	14	Bacteria	32	Firmicutes	Bacilli	Bacillales	Bacillaceae	Falsibacillus
Hu 2020	4	14	Bacteria	32	Firmicutes	Bacilli	Bacillales	Bacillaceae	Fictibacillus
Hu 2020	5	14	Bacteria	32	Firmicutes	Bacilli	Bacillales	Bacillaceae	Bacillus
Hu 2020	6	14	Bacteria	32	Firmicutes	Bacilli	Bacillales	Bacillaceae	Fictibacillus
Hu 2020	7	14	Bacteria	32	Firmicutes	Bacilli	Bacillales	Planococcaceae	Solibacillus
Hu 2020	8	14	Bacteria	32	Firmicutes	Bacilli	Bacillales	Planococcaceae	Lysinibacillus
Hu 2020	9	14	Bacteria	32	Proteobacteria	Alphaproteobacteria	Sphingomonadales	Sphingomonadaceae	Sphingobium
Hu 2020	1	14	Bacteria	32	Proteobacteria	Gammaproteobacteria	Xanthomonadales	Xanthomonadaceae	Lysobacter
Hu 2020	3	14	Bacteria	32	Proteobacteria	Gammaproteobacteria	Xanthomonadales	Xanthomonadaceae	Lysobacter
Hu 2020	10	14	Bacteria	32	Proteobacteria	Gammaproteobacteria	Xanthomonadales	Xanthomonadaceae	Pseudoxanthomonas
Hu 2020	11	14	Bacteria	32	Proteobacteria	Gammaproteobacteria	Xanthomonadales	Xanthomonadaceae	Rehaibacterium
Hu 2020	12	14	Bacteria	32	Proteobacteria	Gammaproteobacteria	Xanthomonadales	Xanthomonadaceae	Lysobacter
Hu 2020	2	15	Bacteria	32	Firmicutes	Bacilli	Bacillales	Bacillaceae	Salirhabdus
Hu 2020	4	15	Bacteria	32	Firmicutes	Bacilli	Bacillales	Bacillaceae	Falsibacillus
Hu 2020	5	15	Bacteria	32	Firmicutes	Bacilli	Bacillales	Bacillaceae	Bacillus
Hu 2020	6	15	Bacteria	32	Firmicutes	Bacilli	Bacillales	Bacillaceae	Fictibacillus
Hu 2020	7	15	Bacteria	32	Firmicutes	Bacilli	Bacillales	Planococcaceae	Solibacillus
Hu 2020	8	15	Bacteria	32	Firmicutes	Bacilli	Bacillales	Planococcaceae	Lysinibacillus
Hu 2020	9	15	Bacteria	32	Proteobacteria	Alphaproteobacteria	Sphingomonadales	Sphingomonadaceae	Sphingobium
Hu 2020	1	15	Bacteria	32	Proteobacteria	Gammaproteobacteria	Xanthomonadales	Xanthomonadaceae	Lysobacter
Hu 2020	3	15	Bacteria	32	Proteobacteria	Gammaproteobacteria	Xanthomonadales	Xanthomonadaceae	Lysobacter
Hu 2020	10	15	Bacteria	32	Proteobacteria	Gammaproteobacteria	Xanthomonadales	Xanthomonadaceae	Pseudoxanthomonas
Hu 2020	11	15	Bacteria	32	Proteobacteria	Gammaproteobacteria	Xanthomonadales	Xanthomonadaceae	Pseudoxanthomonas
Hu 2020	12	15	Bacteria	32	Proteobacteria	Gammaproteobacteria	Xanthomonadales	Xanthomonadaceae	Pseudoxanthomonas
Hu 2020	4	16	Bacteria	32	Firmicutes	Bacilli	Bacillales	Bacillaceae	Fictibacillus
Hu 2020	5	16	Bacteria	32	Firmicutes	Bacilli	Bacillales	Bacillaceae	Fictibacillus
Hu 2020	7	16	Bacteria	32	Firmicutes	Bacilli	Bacillales	Planococcaceae	Solibacillus
Hu 2020	6	16	Bacteria	32	Proteobacteria	Alphaproteobacteria	Sphingomonadales	Sphingomonadaceae	Sphingobium
Hu 2020	9	16	Bacteria	32	Proteobacteria	Alphaproteobacteria	Sphingomonadales	Sphingomonadaceae	Sphingobium
Hu 2020	8	16	Bacteria	32	Firmicutes	Bacilli	Bacillales	Staphylococcaceae	Staphylococcus
Hu 2020	1	16	Bacteria	32	Proteobacteria	Gammaproteobacteria	Xanthomonadales	Xanthomonadaceae	Lysobacter
Hu 2020	2	16	Bacteria	32	Proteobacteria	Gammaproteobacteria	Xanthomonadales	Xanthomonadaceae	Arenimonas
Hu 2020	3	16	Bacteria	32	Proteobacteria	Gammaproteobacteria	Xanthomonadales	Xanthomonadaceae	Lysobacter
Hu 2020	10	16	Bacteria	32	Proteobacteria	Gammaproteobacteria	Xanthomonadales	Xanthomonadaceae	Pseudoxanthomonas
Hu 2020	11	16	Bacteria	32	Proteobacteria	Gammaproteobacteria	Xanthomonadales	Xanthomonadaceae	Pseudoxanthomonas
Hu 2020	12	16	Bacteria	32	Proteobacteria	Gammaproteobacteria	Xanthomonadales	Xanthomonadaceae	Pseudoxanthomonas
Hu 2020	4	17	Bacteria	32	Firmicutes	Bacilli	Bacillales	Bacillaceae	Fictibacillus
Hu 2020	5	17	Bacteria	32	Firmicutes	Bacilli	Bacillales	Bacillaceae	Salirhabdus
Hu 2020	7	17	Bacteria	32	Firmicutes	Bacilli	Bacillales	Planococcaceae	Solibacillus
Hu 2020	6	17	Bacteria	32	Proteobacteria	Alphaproteobacteria	Sphingomonadales	Sphingomonadaceae	Sphingobium
Hu 2020	9	17	Bacteria	32	Proteobacteria	Alphaproteobacteria	Sphingomonadales	Sphingomonadaceae	Sphingobium
Hu 2020	8	17	Bacteria	32	Firmicutes	Bacilli	Bacillales	Staphylococcaceae	Staphylococcus
Hu 2020	1	17	Bacteria	32	Proteobacteria	Gammaproteobacteria	Xanthomonadales	Xanthomonadaceae	Lysobacter
Hu 2020	2	17	Bacteria	32	Proteobacteria	Gammaproteobacteria	Xanthomonadales	Xanthomonadaceae	Arenimonas
Hu 2020	3	17	Bacteria	32	Proteobacteria	Gammaproteobacteria	Xanthomonadales	Xanthomonadaceae	Lysobacter
Hu 2020	10	17	Bacteria	32	Proteobacteria	Gammaproteobacteria	Xanthomonadales	Xanthomonadaceae	Pseudoxanthomonas
Hu 2020	11	17	Bacteria	32	Proteobacteria	Gammaproteobacteria	Xanthomonadales	Xanthomonadaceae	Pseudoxanthomonas
Hu 2020	12	17	Bacteria	32	Proteobacteria	Gammaproteobacteria	Xanthomonadales	Xanthomonadaceae	Pseudoxanthomonas
Hu 2020	4	18	Bacteria	32	Firmicutes	Bacilli	Bacillales	Bacillaceae	Fictibacillus
Hu 2020	7	18	Bacteria	32	Firmicutes	Bacilli	Bacillales	Planococcaceae	Solibacillus
Hu 2020	5	18	Bacteria	32	Proteobacteria	Alphaproteobacteria	Sphingomonadales	Sphingomonadaceae	Sphingobium
Hu 2020	6	18	Bacteria	32	Proteobacteria	Alphaproteobacteria	Sphingomonadales	Sphingomonadaceae	Sphingobium
Hu 2020	9	18	Bacteria	32	Proteobacteria	Alphaproteobacteria	Sphingomonadales	Sphingomonadaceae	Sphingobium
Hu 2020	8	18	Bacteria	32	Firmicutes	Bacilli	Bacillales	Staphylococcaceae	Staphylococcus
Hu 2020	1	18	Bacteria	32	Proteobacteria	Gammaproteobacteria	Xanthomonadales	Xanthomonadaceae	Lysobacter
Hu 2020	2	18	Bacteria	32	Proteobacteria	Gammaproteobacteria	Xanthomonadales	Xanthomonadaceae	Pseudoxanthomonas
Hu 2020	3	18	Bacteria	32	Proteobacteria	Gammaproteobacteria	Xanthomonadales	Xanthomonadaceae	Lysobacter
Hu 2020	10	18	Bacteria	32	Proteobacteria	Gammaproteobacteria	Xanthomonadales	Xanthomonadaceae	Pseudoxanthomonas
Hu 2020	11	18	Bacteria	32	Proteobacteria	Gammaproteobacteria	Xanthomonadales	Xanthomonadaceae	Pseudoxanthomonas
Hu 2020	12	18	Bacteria	32	Proteobacteria	Gammaproteobacteria	Xanthomonadales	Xanthomonadaceae	Pseudoxanthomonas
Hu 2020	4	19	Bacteria	32	Firmicutes	Bacilli	Bacillales	Bacillaceae	Fictibacillus
Hu 2020	7	19	Bacteria	32	Firmicutes	Bacilli	Bacillales	Planococcaceae	Solibacillus
Hu 2020	5	19	Bacteria	32	Proteobacteria	Alphaproteobacteria	Sphingomonadales	Sphingomonadaceae	Sphingobium
Hu 2020	6	19	Bacteria	32	Proteobacteria	Alphaproteobacteria	Sphingomonadales	Sphingomonadaceae	Sphingobium
Hu 2020	9	19	Bacteria	32	Proteobacteria	Alphaproteobacteria	Sphingomonadales	Sphingomonadaceae	Sphingobium
Hu 2020	8	19	Bacteria	32	Firmicutes	Bacilli	Bacillales	Staphylococcaceae	Staphylococcus
Hu 2020	1	19	Bacteria	32	Proteobacteria	Gammaproteobacteria	Xanthomonadales	Xanthomonadaceae	Lysobacter
Hu 2020	2	19	Bacteria	32	Proteobacteria	Gammaproteobacteria	Xanthomonadales	Xanthomonadaceae	Lysobacter
Hu 2020	3	19	Bacteria	32	Proteobacteria	Gammaproteobacteria	Xanthomonadales	Xanthomonadaceae	Lysobacter
Hu 2020	10	19	Bacteria	32	Proteobacteria	Gammaproteobacteria	Xanthomonadales	Xanthomonadaceae	Pseudoxanthomonas
Hu 2020	11	19	Bacteria	32	Proteobacteria	Gammaproteobacteria	Xanthomonadales	Xanthomonadaceae	Pseudoxanthomonas
Hu 2020	12	19	Bacteria	32	Proteobacteria	Gammaproteobacteria	Xanthomonadales	Xanthomonadaceae	Pseudoxanthomonas
Hu 2020	4	20	Bacteria	32	Firmicutes	Bacilli	Bacillales	Planococcaceae	Solibacillus
Hu 2020	7	20	Bacteria	32	Firmicutes	Bacilli	Bacillales	Planococcaceae	Solibacillus
Hu 2020	5	20	Bacteria	32	Proteobacteria	Alphaproteobacteria	Sphingomonadales	Sphingomonadaceae	Sphingopyxis
Hu 2020	6	20	Bacteria	32	Proteobacteria	Alphaproteobacteria	Sphingomonadales	Sphingomonadaceae	Sphingobium
Hu 2020	9	20	Bacteria	32	Proteobacteria	Alphaproteobacteria	Sphingomonadales	Sphingomonadaceae	Sphingobium
Hu 2020	8	20	Bacteria	32	Firmicutes	Bacilli	Bacillales	Staphylococcaceae	Staphylococcus
Hu 2020	1	20	Bacteria	32	Proteobacteria	Gammaproteobacteria	Xanthomonadales	Xanthomonadaceae	Pseudoxanthomonas
Hu 2020	2	20	Bacteria	32	Proteobacteria	Gammaproteobacteria	Xanthomonadales	Xanthomonadaceae	Lysobacter
Hu 2020	3	20	Bacteria	32	Proteobacteria	Gammaproteobacteria	Xanthomonadales	Xanthomonadaceae	Pseudoxanthomonas
Hu 2020	10	20	Bacteria	32	Proteobacteria	Gammaproteobacteria	Xanthomonadales	Xanthomonadaceae	Pseudoxanthomonas
Hu 2020	11	20	Bacteria	32	Proteobacteria	Gammaproteobacteria	Xanthomonadales	Xanthomonadaceae	Pseudoxanthomonas
Hu 2020	12	20	Bacteria	32	Proteobacteria	Gammaproteobacteria	Xanthomonadales	Xanthomonadaceae	Pseudoxanthomonas
Hu 2020	4	21	Bacteria	32	Proteobacteria	Alphaproteobacteria	Caulobacterales	Caulobacteraceae	Brevundimonas
Hu 2020	7	21	Bacteria	32	Firmicutes	Bacilli	Bacillales	Planococcaceae	Solibacillus
Hu 2020	5	21	Bacteria	32	Proteobacteria	Alphaproteobacteria	Sphingomonadales	Sphingomonadaceae	Sphingopyxis
Hu 2020	6	21	Bacteria	32	Proteobacteria	Alphaproteobacteria	Sphingomonadales	Sphingomonadaceae	Sphingopyxis
Hu 2020	9	21	Bacteria	32	Proteobacteria	Alphaproteobacteria	Sphingomonadales	Sphingomonadaceae	Sphingobium
Hu 2020	8	21	Bacteria	32	Firmicutes	Bacilli	Bacillales	Staphylococcaceae	Staphylococcus
Hu 2020	2	21	Bacteria	32	unclassified	unclassified	unclassified	unclassified	unclassified
Hu 2020	1	21	Bacteria	32	Proteobacteria	Gammaproteobacteria	Xanthomonadales	Xanthomonadaceae	Luteimonas
Hu 2020	3	21	Bacteria	32	Proteobacteria	Gammaproteobacteria	Xanthomonadales	Xanthomonadaceae	Rehaibacterium
Hu 2020	10	21	Bacteria	32	Proteobacteria	Gammaproteobacteria	Xanthomonadales	Xanthomonadaceae	Pseudoxanthomonas
Hu 2020	11	21	Bacteria	32	Proteobacteria	Gammaproteobacteria	Xanthomonadales	Xanthomonadaceae	Pseudoxanthomonas
Hu 2020	12	21	Bacteria	32	Proteobacteria	Gammaproteobacteria	Xanthomonadales	Xanthomonadaceae	Pseudoxanthomonas
Hu 2020	7	22	Bacteria	32	Firmicutes	Bacilli	Bacillales	Planococcaceae	Lysinibacillus
Hu 2020	4	22	Bacteria	32	Proteobacteria	Alphaproteobacteria	Rhizobiales	Rhizobiaceae	Ciceribacter
Hu 2020	8	22	Bacteria	32	Proteobacteria	Alphaproteobacteria	Sphingomonadales	Sphingomonadaceae	Sphingobium
Hu 2020	9	22	Bacteria	32	Proteobacteria	Alphaproteobacteria	Sphingomonadales	Sphingomonadaceae	Sphingobium
Hu 2020	2	22	Bacteria	32	unclassified	unclassified	unclassified	unclassified	unclassified
Hu 2020	3	22	Bacteria	32	unclassified	unclassified	unclassified	unclassified	unclassified
Hu 2020	1	22	Bacteria	32	Proteobacteria	Gammaproteobacteria	Xanthomonadales	Xanthomonadaceae	Luteimonas
Hu 2020	5	22	Bacteria	32	Proteobacteria	Gammaproteobacteria	Xanthomonadales	Xanthomonadaceae	Aspromonas
Hu 2020	6	22	Bacteria	32	Proteobacteria	Gammaproteobacteria	Xanthomonadales	Xanthomonadaceae	Luteimonas
Hu 2020	10	22	Bacteria	32	Proteobacteria	Gammaproteobacteria	Xanthomonadales	Xanthomonadaceae	Pseudoxanthomonas
Hu 2020	11	22	Bacteria	32	Proteobacteria	Gammaproteobacteria	Xanthomonadales	Xanthomonadaceae	Pseudoxanthomonas
Hu 2020	12	22	Bacteria	32	Proteobacteria	Gammaproteobacteria	Xanthomonadales	Xanthomonadaceae	Pseudoxanthomonas
Hu 2020	4	23	Bacteria	32	Proteobacteria	Alphaproteobacteria	Sphingomonadales	Sphingomonadaceae	Sphingobium
Hu 2020	8	23	Bacteria	32	Proteobacteria	Alphaproteobacteria	Sphingomonadales	Sphingomonadaceae	Sphingobium
Hu 2020	9	23	Bacteria	32	Proteobacteria	Alphaproteobacteria	Sphingomonadales	Sphingomonadaceae	Sphingobium
Hu 2020	7	23	Bacteria	32	Firmicutes	Bacilli	Bacillales	Staphylococcaceae	Staphylococcus
Hu 2020	2	23	Bacteria	32	unclassified	unclassified	unclassified	unclassified	unclassified
Hu 2020	3	23	Bacteria	32	unclassified	unclassified	unclassified	unclassified	unclassified
Hu 2020	1	23	Bacteria	32	Proteobacteria	Gammaproteobacteria	Xanthomonadales	Xanthomonadaceae	Arenimonas
Hu 2020	5	23	Bacteria	32	Proteobacteria	Gammaproteobacteria	Xanthomonadales	Xanthomonadaceae	Pseudoxanthomonas
Hu 2020	6	23	Bacteria	32	Proteobacteria	Gammaproteobacteria	Xanthomonadales	Xanthomonadaceae	Lysobacter
Hu 2020	10	23	Bacteria	32	Proteobacteria	Gammaproteobacteria	Xanthomonadales	Xanthomonadaceae	Pseudoxanthomonas
Hu 2020	11	23	Bacteria	32	Proteobacteria	Gammaproteobacteria	Xanthomonadales	Xanthomonadaceae	Pseudoxanthomonas
Hu 2020	12	23	Bacteria	32	Proteobacteria	Gammaproteobacteria	Xanthomonadales	Xanthomonadaceae	Pseudoxanthomonas
Hu 2020	9	24	Bacteria	32	Proteobacteria	Betaproteobacteria	Burkholderiales	Comamonadaceae	Schlegelella
Hu 2020	4	24	Bacteria	32	Proteobacteria	Alphaproteobacteria	Sphingomonadales	Sphingomonadaceae	Sphingobium
Hu 2020	8	24	Bacteria	32	Proteobacteria	Alphaproteobacteria	Sphingomonadales	Sphingomonadaceae	Sphingobium
Hu 2020	7	24	Bacteria	32	Firmicutes	Bacilli	Bacillales	Staphylococcaceae	Staphylococcus
Hu 2020	2	24	Bacteria	32	unclassified	unclassified	unclassified	unclassified	unclassified
Hu 2020	3	24	Bacteria	32	unclassified	unclassified	unclassified	unclassified	unclassified
Hu 2020	1	24	Bacteria	32	Proteobacteria	Gammaproteobacteria	Xanthomonadales	Xanthomonadaceae	Rehaibacterium
Hu 2020	5	24	Bacteria	32	Proteobacteria	Gammaproteobacteria	Xanthomonadales	Xanthomonadaceae	Pseudoxanthomonas
Hu 2020	6	24	Bacteria	32	Proteobacteria	Gammaproteobacteria	Xanthomonadales	Xanthomonadaceae	Lysobacter
Hu 2020	10	24	Bacteria	32	Proteobacteria	Gammaproteobacteria	Xanthomonadales	Xanthomonadaceae	Pseudoxanthomonas
Hu 2020	11	24	Bacteria	32	Proteobacteria	Gammaproteobacteria	Xanthomonadales	Xanthomonadaceae	Pseudoxanthomonas
Hu 2020	12	24	Bacteria	32	Proteobacteria	Gammaproteobacteria	Xanthomonadales	Xanthomonadaceae	Pseudoxanthomonas
Hu 2020	4	25	Bacteria	32	Proteobacteria	Alphaproteobacteria	Sphingomonadales	Sphingomonadaceae	Sphingopyxis
Hu 2020	7	25	Bacteria	32	Proteobacteria	Alphaproteobacteria	Sphingomonadales	Sphingomonadaceae	Sphingobium
Hu 2020	8	25	Bacteria	32	Proteobacteria	Alphaproteobacteria	Sphingomonadales	Sphingomonadaceae	Sphingobium
Hu 2020	1	25	Bacteria	32	unclassified	unclassified	unclassified	unclassified	unclassified
Hu 2020	2	25	Bacteria	32	unclassified	unclassified	unclassified	unclassified	unclassified
Hu 2020	3	25	Bacteria	32	unclassified	unclassified	unclassified	unclassified	unclassified
Hu 2020	5	25	Bacteria	32	Proteobacteria	Gammaproteobacteria	Xanthomonadales	Xanthomonadaceae	Pseudoxanthomonas
Hu 2020	6	25	Bacteria	32	Proteobacteria	Gammaproteobacteria	Xanthomonadales	Xanthomonadaceae	Pseudoxanthomonas
Hu 2020	9	25	Bacteria	32	Proteobacteria	Gammaproteobacteria	Xanthomonadales	Xanthomonadaceae	Lysobacter
Hu 2020	10	25	Bacteria	32	Proteobacteria	Gammaproteobacteria	Xanthomonadales	Xanthomonadaceae	Pseudoxanthomonas
Hu 2020	11	25	Bacteria	32	Proteobacteria	Gammaproteobacteria	Xanthomonadales	Xanthomonadaceae	Pseudoxanthomonas
Hu 2020	12	25	Bacteria	32	Proteobacteria	Gammaproteobacteria	Xanthomonadales	Xanthomonadaceae	Pseudoxanthomonas
Hu 2020	8	26	Bacteria	32	Proteobacteria	Alphaproteobacteria	Sphingomonadales	Sphingomonadaceae	Sphingobium
Hu 2020	1	26	Bacteria	32	unclassified	unclassified	unclassified	unclassified	unclassified
Hu 2020	2	26	Bacteria	32	unclassified	unclassified	unclassified	unclassified	unclassified
Hu 2020	3	26	Bacteria	32	unclassified	unclassified	unclassified	unclassified	unclassified
Hu 2020	4	26	Bacteria	32	Proteobacteria	Gammaproteobacteria	Xanthomonadales	Xanthomonadaceae	Pseudoxanthomonas
Hu 2020	5	26	Bacteria	32	Proteobacteria	Gammaproteobacteria	Xanthomonadales	Xanthomonadaceae	Rehaibacterium
Hu 2020	6	26	Bacteria	32	Proteobacteria	Gammaproteobacteria	Xanthomonadales	Xanthomonadaceae	Pseudoxanthomonas
Hu 2020	7	26	Bacteria	32	Proteobacteria	Gammaproteobacteria	Xanthomonadales	Xanthomonadaceae	Lysobacter
Hu 2020	9	26	Bacteria	32	Proteobacteria	Gammaproteobacteria	Xanthomonadales	Xanthomonadaceae	Lysobacter
Hu 2020	10	26	Bacteria	32	Proteobacteria	Gammaproteobacteria	Xanthomonadales	Xanthomonadaceae	Pseudoxanthomonas
Hu 2020	11	26	Bacteria	32	Proteobacteria	Gammaproteobacteria	Xanthomonadales	Xanthomonadaceae	Pseudoxanthomonas
Hu 2020	12	26	Bacteria	32	Proteobacteria	Gammaproteobacteria	Xanthomonadales	Xanthomonadaceae	Pseudoxanthomonas
Hu 2020	8	27	Bacteria	32	Proteobacteria	Alphaproteobacteria	Sphingomonadales	Sphingomonadaceae	Sphingobium
Hu 2020	1	27	Bacteria	32	unclassified	unclassified	unclassified	unclassified	unclassified
Hu 2020	2	27	Bacteria	32	unclassified	unclassified	unclassified	unclassified	unclassified
Hu 2020	3	27	Bacteria	32	unclassified	unclassified	unclassified	unclassified	unclassified
Hu 2020	4	27	Bacteria	32	Proteobacteria	Gammaproteobacteria	Xanthomonadales	Xanthomonadaceae	Pseudoxanthomonas
Hu 2020	5	27	Bacteria	32	Proteobacteria	Gammaproteobacteria	Xanthomonadales	Xanthomonadaceae	Thermomonas
Hu 2020	6	27	Bacteria	32	Proteobacteria	Gammaproteobacteria	Xanthomonadales	Xanthomonadaceae	Pseudoxanthomonas
Hu 2020	7	27	Bacteria	32	Proteobacteria	Gammaproteobacteria	Xanthomonadales	Xanthomonadaceae	Lysobacter
Hu 2020	9	27	Bacteria	32	Proteobacteria	Gammaproteobacteria	Xanthomonadales	Xanthomonadaceae	Pseudoxanthomonas
Hu 2020	10	27	Bacteria	32	Proteobacteria	Gammaproteobacteria	Xanthomonadales	Xanthomonadaceae	Pseudoxanthomonas
Hu 2020	11	27	Bacteria	32	Proteobacteria	Gammaproteobacteria	Xanthomonadales	Xanthomonadaceae	Pseudoxanthomonas
Hu 2020	12	27	Bacteria	32	Proteobacteria	Gammaproteobacteria	Xanthomonadales	Xanthomonadaceae	Pseudoxanthomonas
Hu 2020	8	28	Bacteria	32	Proteobacteria	Alphaproteobacteria	Sneathiellales	Sneathiellaceae	Ferrovibrio
Hu 2020	1	28	Bacteria	32	unclassified	unclassified	unclassified	unclassified	unclassified
Hu 2020	2	28	Bacteria	32	unclassified	unclassified	unclassified	unclassified	unclassified
Hu 2020	3	28	Bacteria	32	unclassified	unclassified	unclassified	unclassified	unclassified
Hu 2020	4	28	Bacteria	32	Proteobacteria	Gammaproteobacteria	Xanthomonadales	Xanthomonadaceae	Pseudoxanthomonas
Hu 2020	5	28	Bacteria	32	Proteobacteria	Gammaproteobacteria	Xanthomonadales	Xanthomonadaceae	Thermomonas
Hu 2020	6	28	Bacteria	32	Proteobacteria	Gammaproteobacteria	Xanthomonadales	Xanthomonadaceae	Pseudoxanthomonas
Hu 2020	7	28	Bacteria	32	Proteobacteria	Gammaproteobacteria	Xanthomonadales	Xanthomonadaceae	Pseudoxanthomonas
Hu 2020	9	28	Bacteria	32	Proteobacteria	Gammaproteobacteria	Xanthomonadales	Xanthomonadaceae	Pseudoxanthomonas
Hu 2020	10	28	Bacteria	32	Proteobacteria	Gammaproteobacteria	Xanthomonadales	Xanthomonadaceae	Pseudoxanthomonas
Hu 2020	11	28	Bacteria	32	Proteobacteria	Gammaproteobacteria	Xanthomonadales	Xanthomonadaceae	Pseudoxanthomonas
Hu 2020	12	28	Bacteria	32	Proteobacteria	Gammaproteobacteria	Xanthomonadales	Xanthomonadaceae	Pseudoxanthomonas
Hu 2020	1	29	Bacteria	32	unclassified	unclassified	unclassified	unclassified	unclassified
Hu 2020	2	29	Bacteria	32	unclassified	unclassified	unclassified	unclassified	unclassified
Hu 2020	3	29	Bacteria	32	unclassified	unclassified	unclassified	unclassified	unclassified
Hu 2020	5	29	Bacteria	32	unclassified	unclassified	unclassified	unclassified	unclassified
Hu 2020	7	29	Bacteria	32	unclassified	unclassified	unclassified	unclassified	unclassified
Hu 2020	10	29	Bacteria	32	unclassified	unclassified	unclassified	unclassified	unclassified
Hu 2020	4	29	Bacteria	32	Proteobacteria	Gammaproteobacteria	Xanthomonadales	Xanthomonadaceae	Xylella
Hu 2020	6	29	Bacteria	32	Proteobacteria	Gammaproteobacteria	Xanthomonadales	Xanthomonadaceae	Pseudoxanthomonas
Hu 2020	8	29	Bacteria	32	Proteobacteria	Gammaproteobacteria	Xanthomonadales	Xanthomonadaceae	Aspromonas
Hu 2020	9	29	Bacteria	32	Proteobacteria	Gammaproteobacteria	Xanthomonadales	Xanthomonadaceae	Pseudoxanthomonas
Hu 2020	11	29	Bacteria	32	Proteobacteria	Gammaproteobacteria	Xanthomonadales	Xanthomonadaceae	Pseudoxanthomonas
Hu 2020	12	29	Bacteria	32	Proteobacteria	Gammaproteobacteria	Xanthomonadales	Xanthomonadaceae	Pseudoxanthomonas
Hu 2020	1	30	Bacteria	32	unclassified	unclassified	unclassified	unclassified	unclassified
Hu 2020	2	30	Bacteria	32	unclassified	unclassified	unclassified	unclassified	unclassified
Hu 2020	3	30	Bacteria	32	unclassified	unclassified	unclassified	unclassified	unclassified
Hu 2020	4	30	Bacteria	32	unclassified	unclassified	unclassified	unclassified	unclassified
Hu 2020	5	30	Bacteria	32	unclassified	unclassified	unclassified	unclassified	unclassified
Hu 2020	7	30	Bacteria	32	unclassified	unclassified	unclassified	unclassified	unclassified
Hu 2020	10	30	Bacteria	32	unclassified	unclassified	unclassified	unclassified	unclassified
Hu 2020	12	30	Bacteria	32	unclassified	unclassified	unclassified	unclassified	unclassified
Hu 2020	6	30	Bacteria	32	Proteobacteria	Gammaproteobacteria	Xanthomonadales	Xanthomonadaceae	Pseudoxanthomonas
Hu 2020	8	30	Bacteria	32	Proteobacteria	Gammaproteobacteria	Xanthomonadales	Xanthomonadaceae	Pseudoxanthomonas
Hu 2020	9	30	Bacteria	32	Proteobacteria	Gammaproteobacteria	Xanthomonadales	Xanthomonadaceae	Pseudoxanthomonas
Hu 2020	11	30	Bacteria	32	Proteobacteria	Gammaproteobacteria	Xanthomonadales	Xanthomonadaceae	Pseudoxanthomonas
Hu 2020	1	31	Bacteria	32	unclassified	unclassified	unclassified	unclassified	unclassified
Hu 2020	2	31	Bacteria	32	unclassified	unclassified	unclassified	unclassified	unclassified
Hu 2020	3	31	Bacteria	32	unclassified	unclassified	unclassified	unclassified	unclassified
Hu 2020	4	31	Bacteria	32	unclassified	unclassified	unclassified	unclassified	unclassified
Hu 2020	5	31	Bacteria	32	unclassified	unclassified	unclassified	unclassified	unclassified
Hu 2020	7	31	Bacteria	32	unclassified	unclassified	unclassified	unclassified	unclassified
Hu 2020	9	31	Bacteria	32	unclassified	unclassified	unclassified	unclassified	unclassified
Hu 2020	10	31	Bacteria	32	unclassified	unclassified	unclassified	unclassified	unclassified
Hu 2020	12	31	Bacteria	32	unclassified	unclassified	unclassified	unclassified	unclassified
Hu 2020	6	31	Bacteria	32	Proteobacteria	Gammaproteobacteria	Xanthomonadales	Xanthomonadaceae	Pseudoxanthomonas
Hu 2020	8	31	Bacteria	32	Proteobacteria	Gammaproteobacteria	Xanthomonadales	Xanthomonadaceae	Pseudoxanthomonas
Hu 2020	11	31	Bacteria	32	Proteobacteria	Gammaproteobacteria	Xanthomonadales	Xanthomonadaceae	Pseudoxanthomonas
Hu 2020	1	32	Bacteria	32	unclassified	unclassified	unclassified	unclassified	unclassified
Hu 2020	2	32	Bacteria	32	unclassified	unclassified	unclassified	unclassified	unclassified
Hu 2020	3	32	Bacteria	32	unclassified	unclassified	unclassified	unclassified	unclassified
Hu 2020	4	32	Bacteria	32	unclassified	unclassified	unclassified	unclassified	unclassified
Hu 2020	5	32	Bacteria	32	unclassified	unclassified	unclassified	unclassified	unclassified
Hu 2020	6	32	Bacteria	32	unclassified	unclassified	unclassified	unclassified	unclassified
Hu 2020	7	32	Bacteria	32	unclassified	unclassified	unclassified	unclassified	unclassified
Hu 2020	8	32	Bacteria	32	unclassified	unclassified	unclassified	unclassified	unclassified
Hu 2020	9	32	Bacteria	32	unclassified	unclassified	unclassified	unclassified	unclassified
Hu 2020	10	32	Bacteria	32	unclassified	unclassified	unclassified	unclassified	unclassified
Hu 2020	12	32	Bacteria	32	unclassified	unclassified	unclassified	unclassified	unclassified
Hu 2020	11	32	Bacteria	32	Proteobacteria	Gammaproteobacteria	Xanthomonadales	Xanthomonadaceae	Pseudoxanthomonas
Carrión 2019	1	1	Bacteria	35	Bacteroidetes	Flavobacteriia	Flavobacteriales	Flavobacteriaceae	Flavobacterium		Fl96
Carrión 2019	1	2	Bacteria	35	Bacteroidetes	Flavobacteriia	Flavobacteriales	Flavobacteriaceae	Flavobacterium		Fl97
Carrión 2019	1	3	Bacteria	35	Bacteroidetes	Flavobacteriia	Flavobacteriales	Flavobacteriaceae	Flavobacterium		Fl98
Carrión 2019	1	4	Bacteria	35	Bacteroidetes	Flavobacteriia	Flavobacteriales	Flavobacteriaceae	Flavobacterium		5B
Carrión 2019	1	5	Bacteria	35	Bacteroidetes	Chitinophagia	Sphingobacteriales	Chitinophagaceae	Chitinophaga		Ch93
Carrión 2019	1	6	Bacteria	35	Bacteroidetes	Chitinophagia	Sphingobacteriales	Chitinophagaceae	Chitinophaga		Ch94
Carrión 2019	1	7	Bacteria	35	Bacteroidetes	Chitinophagia	Sphingobacteriales	Chitinophagaceae	Chitinophaga		Ch95
Castrillo 2017	1	1	Bacteria	35	Actinobacteria	Actinobacteria	Actinomycetales	Intrasporangiaceae	Terracoccus		273MFTsu3.1
Castrillo 2017	1	2	Bacteria	35	Actinobacteria	Actinobacteria	Actinomycetales	Microbacteriaceae	Curtobacterium		314Chir4.1
Castrillo 2017	1	3	Bacteria	35	Actinobacteria	Actinobacteria	Actinomycetales	Microbacteriaceae	Leifsonia		109
Castrillo 2017	1	4	Bacteria	35	Actinobacteria	Actinobacteria	Actinomycetales	Micrococcaceae	Arthrobacter		161MFSha2.1
Castrillo 2017	1	5	Bacteria	35	Actinobacteria	Actinobacteria	Actinomycetales	Micrococcaceae	Arthrobacter		UNC362MFTsu5.1
Castrillo 2017	1	6	Bacteria	35	Actinobacteria	Actinobacteria	Actinomycetales	Mycobacteriaceae	Mycobacterium		360MFTsu5.1
Castrillo 2017	1	7	Bacteria	35	Actinobacteria	Actinobacteria	Actinomycetales	Nocardiaceae	Rhodococcus		29MFTsu3.1
Castrillo 2017	1	8	Bacteria	35	Actinobacteria	Actinobacteria	Actinomycetales	Nocardioidaceae	Nocardioides		UNC345MFTsu5.1
Castrillo 2017	1	9	Bacteria	35	Actinobacteria	Actinobacteria	Actinomycetales	Promicromonosporaceae	Promicromonospora	sukumoe	327MFSha3.1
Castrillo 2017	1	10	Bacteria	35	Actinobacteria	Actinobacteria	Actinomycetales	Streptomycetaceae	Streptomyces	canus	299MFChir4.1
Castrillo 2017	1	11	Bacteria	35	Actinobacteria	Actinobacteria	Actinomycetales	Streptomycetaceae	Streptomyces		136MFCol5.1
Castrillo 2017	1	12	Bacteria	35	Actinobacteria	Actinobacteria	Actinomycetales	Streptomycetaceae	Streptomyces		303MFCol5.2
Castrillo 2017	1	13	Bacteria	35	Actinobacteria	Actinobacteria	Actinomycetales	Streptomycetaceae	Streptomyces		UNC401CLCol
Castrillo 2017	1	14	Bacteria	35	Actinobacteria	Actinobacteria	Corynebacteriales	Nocardiaceae	Rhodococcus		339MFSha3.1
Castrillo 2017	1	15	Bacteria	35	Bacteroidetes	Flavobacteriia	Flavobacteriales	Flavobacteriaceae	Chryseobacterium		UNC8MFCol
Castrillo 2017	1	16	Bacteria	35	Bacteroidetes	Flavobacteriia	Flavobacteriales	Flavobacteriaceae	Flavobacterium		40S8
Castrillo 2017	1	17	Bacteria	35	Firmicutes	Bacilli	Bacillales	Bacillaceae	Bacillus		105MF
Castrillo 2017	1	18	Bacteria	35	Firmicutes	Bacilli	Bacillales	Bacillaceae	Bacillus		27Col1.1E
Castrillo 2017	1	19	Bacteria	35	Firmicutes	Bacilli	Bacillales	Bacillaceae	Bacillus		UNC125MFCrub1.1
Castrillo 2017	1	20	Bacteria	35	Firmicutes	Bacilli	Bacillales	Bacillaceae	Bacillus		UNC41MFS5
Castrillo 2017	1	21	Bacteria	35	Firmicutes	Bacilli	Bacillales	Paenibacillaceae	Paenibacillus		181MFCol5.1
Castrillo 2017	1	22	Bacteria	35	Proteobacteria	Alphaproteobacteria	Caulobacterales	Caulobacteraceae	Brevundimonas		374
Castrillo 2017	1	23	Bacteria	35	Proteobacteria	Alphaproteobacteria	Rhizobiales	Brucellaceae	Ochrobactrum		370MFChir3.1
Castrillo 2017	1	24	Bacteria	35	Proteobacteria	Alphaproteobacteria	Rhizobiales	Phyllobacteriaceae	Phyllobacterium		UNC302MFCol5.2
Castrillo 2017	1	25	Bacteria	35	Proteobacteria	Alphaproteobacteria	Rhizobiales	Rhizobiaceae	Agrobacterium		33MFTa1.1
Castrillo 2017	1	26	Bacteria	35	Proteobacteria	Alphaproteobacteria	Rhizobiales	Rhizobiaceae	Rhizobium		2MFCol3.1
Castrillo 2017	1	27	Bacteria	35	Proteobacteria	Betaproteobacteria	Burkholderiales	Burkholderiaceae	Burkholderia	bryophila	376MFSha3.1
Castrillo 2017	1	28	Bacteria	35	Proteobacteria	Betaproteobacteria	Burkholderiales	Burkholderiaceae	Ralstonia		UNC404CL21Col
Castrillo 2017	1	29	Bacteria	35	Proteobacteria	Betaproteobacteria	Burkholderiales	Comamonadaceae	Polaromonas		JS666_UNC47MFTsu3.1
Castrillo 2017	1	30	Bacteria	35	Proteobacteria	Betaproteobacteria	Burkholderiales	Comamonadaceae	Variovorax	paradoxus	CL14
Castrillo 2017	1	31	Bacteria	35	Proteobacteria	Gammaproteobacteria	Enterobacteriales	Enterobacteriaceae	Escherichia
Castrillo 2017	1	32	Bacteria	35	Proteobacteria	Gammaproteobacteria	Pseudomonadales	Moraxellaceae	Acinetobacter		UNC434CL69Tsu2S25
Castrillo 2017	1	33	Bacteria	35	Proteobacteria	Gammaproteobacteria	Pseudomonadales	Pseudomonadaceae	Pseudomonas		KD5
Castrillo 2017	1	34	Bacteria	35	Proteobacteria	Gammaproteobacteria	Xanthomonadales	Xanthomonadaceae	Dyella	japonica	UNC79MFTsu3.2
Castrillo 2017	1	35	Bacteria	35	Proteobacteria	Gammaproteobacteria	Xanthomonadales	Xanthomonadaceae	Luteibacter		UNC138MFCol5.1
Lebeis 2015	1	1	Bacteria	38	Actinobacteria	Actinobacteria	Actinomycetales	Microbacteriaceae	Leifsonia
Lebeis 2015	1	2	Bacteria	38	Actinobacteria	Actinobacteria	Actinomycetales	Micrococcaceae	Arthrobacter	nicotinovorans
Lebeis 2015	1	3	Bacteria	38	Actinobacteria	Actinobacteria	Actinomycetales	Micrococcaceae	Arthrobacter
Lebeis 2015	1	4	Bacteria	38	Actinobacteria	Actinobacteria	Actinomycetales	Mycobacteriaceae	Mycobacterium	mucogenicum
Lebeis 2015	1	5	Bacteria	38	Actinobacteria	Actinobacteria	Actinomycetales	Mycobacteriaceae
Lebeis 2015	1	6	Bacteria	38	Actinobacteria	Actinobacteria	Actinomycetales	Nocardiaceae	Rhodococcus	maanshanesis
Lebeis 2015	1	7	Bacteria	38	Actinobacteria	Actinobacteria	Actinomycetales	Nocardiaceae	Rhodococcus
Lebeis 2015	1	8	Bacteria	38	Actinobacteria	Actinobacteria	Actinomycetales	Nocardiaceae	Rhodococcus
Lebeis 2015	1	9	Bacteria	38	Actinobacteria	Actinobacteria	Actinomycetales	Promicromonosporaceae	Promicromonospora
Lebeis 2015	1	10	Bacteria	38	Actinobacteria	Actinobacteria	Actinomycetales	Streptomycetaceae	Streptomyces	rishirensis
Lebeis 2015	1	11	Bacteria	38	Actinobacteria	Actinobacteria	Actinomycetales	Streptomycetaceae	Streptomyces
Lebeis 2015	1	12	Bacteria	38	Actinobacteria	Actinobacteria	Actinomycetales	Streptomycetaceae	Streptomyces
Lebeis 2015	1	13	Bacteria	38	Actinobacteria	Actinobacteria	Actinomycetales	Streptomycetaceae	Streptomyces
Lebeis 2015	1	14	Bacteria	38	Actinobacteria	Actinobacteria	Micrococcales	Intrasporangiaceae	Terracoccus
Lebeis 2015	1	15	Bacteria	38	Bacteroidetes	Cytophagia	Cytophagales	Cytophagaceae	Spirosoma
Lebeis 2015	1	16	Bacteria	38	Bacteroidetes	Cytophagia	Cytophagales	Cytophagaceae
Lebeis 2015	1	17	Bacteria	38	Bacteroidetes	Flavobacteriia	Flavobacteriales	Flavobacteriaceae	Chryseobacterium
Lebeis 2015	1	18	Bacteria	38	Bacteroidetes	Flavobacteriia	Flavobacteriales	Flavobacteriaceae	Flavobacterium	johnsoniae
Lebeis 2015	1	19	Bacteria	38	Bacteroidetes	Sphingobacteriia	Sphingobacteriales	Sphingobacteriaceae	unclassified
Lebeis 2015	1	20	Bacteria	38	Bacteroidetes	Sphingobacteriia	Sphingobacteriales	Sphingobacteriaceae	Unclassified
Lebeis 2015	1	21	Bacteria	38	Firmicutes	Bacilli	Bacillales	Bacillaceae	Bacillus
Lebeis 2015	1	22	Bacteria	38	Firmicutes	Bacilli	Bacillales	Bacillaceae	Bacillus
Lebeis 2015	1	23	Bacteria	38	Firmicutes	Bacilli	Bacillales	Bacillaceae	Bacillus
Lebeis 2015	1	24	Bacteria	38	Firmicutes	Bacilli	Bacillales	Paenibacillaceae	Unclassified
Lebeis 2015	1	25	Bacteria	38	Proteobacteria	Alphaproteobacteria	Caulobacterales	Caulobacteraceae	Caulobacter
Lebeis 2015	1	26	Bacteria	38	Proteobacteria	Alphaproteobacteria	Rhizobiales	Bradyrhizobiaceae	Bosea
Lebeis 2015	1	27	Bacteria	38	Proteobacteria	Alphaproteobacteria	Rhizobiales	Methylobacteriaceae	Methylobacterium
Lebeis 2015	1	28	Bacteria	38	Proteobacteria	Alphaproteobacteria	Rhizobiales	Phyllobacteriaceae	Phyllobacterium
Lebeis 2015	1	29	Bacteria	38	Proteobacteria	Alphaproteobacteria	Rhizobiales	Rhizobiaceae	Agrobacterium
Lebeis 2015	1	30	Bacteria	38	Proteobacteria	Alphaproteobacteria	Rhizobiales	Rhizobiaceae	Rhizobium
Lebeis 2015	1	31	Bacteria	38	Proteobacteria	Betaproteobacteria	Burkholderiales	Burkholderiaceae	Burkholderia
Lebeis 2015	1	32	Bacteria	38	Proteobacteria	Betaproteobacteria	Burkholderiales	Burkholderiaceae
Lebeis 2015	1	33	Bacteria	38	Proteobacteria	Betaproteobacteria	Burkholderiales	Comamonadaceae	Variovorax	paradoxus
Lebeis 2015	1	34	Bacteria	38	Proteobacteria	Betaproteobacteria	Burkholderiales	Ralstoniaceae	Ralstonia	mannitolilytica
Lebeis 2015	1	35	Bacteria	38	Proteobacteria	Gammaproteobacteria	Enterobacterales	Enterobacteriaceae	Esherichia	coli
Lebeis 2015	1	36	Bacteria	38	Proteobacteria	Gammaproteobacteria	Pseudomonadales	Moraxellaceae
Lebeis 2015	1	37	Bacteria	38	Proteobacteria	Gammaproteobacteria	Pseudomonadales	Pseudomonadaceae	Pseudomonas
Lebeis 2015	1	38	Bacteria	38	Proteobacteria	Gammaproteobacteria	Xanthomonadales	Xanthomonadaceae	Dyella	marensis
Gadhave 2018	1	1	Bacteria	84	Firmicutes	Bacilli	Bacillales	Bacillaceae	Bacillus	cereus	8 FW Athal
Gadhave 2018	1	2	Bacteria	84	Firmicutes	Bacilli	Bacillales	Bacillaceae	Bacillus	subtilis	NRRLB23051
Gadhave 2018	1	3	Bacteria	84	Firmicutes	Bacilli	Bacillales	Bacillaceae	Bacillus	amyloliquefaciens	FZB42-BGSC10A6
Hartman 2017	1	1	Bacteria	84	Actinobacteria	Actinobacteria	Actinomycetales	Micrococcaceae	Microbacterium	oxydans
Hartman 2017	1	2	Bacteria	84	Bacteroidetes	Flavobacteriia	Flavobacteriales	Flavobacteriaceae	Flavobacterium	succinicans
Hartman 2017	1	3	Bacteria	84	Proteobacteria	Betaproteobacteria	Burkholderiales	Oxalobacteraceae	Janthinobacterium	lividum
Hartman 2017	1	4	Bacteria	84	Proteobacteria	Gammaproteobacteria	Pseudomonadales	Pseudomonadaceae	Pseudomonas
Herrera Paredes 2018	1	1	Bacteria	84	Actinobacteria	Actinobacteria	Actinomycetales	Microbacteriaceae	Cryocola		340MFSha3.1
Herrera Paredes 2018	1	2	Bacteria	84	Actinobacteria	Actinobacteria	Actinomycetales	Microbacteriaceae	Curtobacterium		UNCCL17
Herrera Paredes 2018	1	3	Bacteria	84	Actinobacteria	Actinobacteria	Actinomycetales	Microbacteriaceae	Leifsonia
Herrera Paredes 2018	1	4	Bacteria	84	Actinobacteria	Actinobacteria	Actinomycetales	Microbacteriaceae	Leifsonia
Herrera Paredes 2018	1	5	Bacteria	84	Actinobacteria	Actinobacteria	Actinomycetales	Microbacteriaceae	Leifsonia
Herrera Paredes 2018	1	6	Bacteria	84	Actinobacteria	Actinobacteria	Actinomycetales	Microbacteriaceae	Leifsonia
Herrera Paredes 2018	1	7	Bacteria	84	Actinobacteria	Actinobacteria	Actinomycetales	Microbacteriaceae	Microbacterium	paraoxydans	77MFTsu3.2
Herrera Paredes 2018	1	8	Bacteria	84	Actinobacteria	Actinobacteria	Actinomycetales	Microbacteriaceae	Microbacterium
Herrera Paredes 2018	1	9	Bacteria	84	Actinobacteria	Actinobacteria	Actinomycetales	Microbacteriaceae	Microbacterium
Herrera Paredes 2018	1	10	Bacteria	84	Actinobacteria	Actinobacteria	Actinomycetales	Micrococcaceae	Arthrobacter		131MFCol6.1
Herrera Paredes 2018	1	11	Bacteria	84	Actinobacteria	Actinobacteria	Actinomycetales	Micrococcaceae	Arthrobacter		UNCCL28
Herrera Paredes 2018	1	12	Bacteria	84	Actinobacteria	Actinobacteria	Actinomycetales	Micrococcaceae	Arthrobacter
Herrera Paredes 2018	1	13	Bacteria	84	Actinobacteria	Actinobacteria	Actinomycetales	Micrococcaceae	Arthrobacter
Herrera Paredes 2018	1	14	Bacteria	84	Actinobacteria	Actinobacteria	Actinomycetales	Micrococcaceae	Arthrobacter
Herrera Paredes 2018	1	15	Bacteria	84	Actinobacteria	Actinobacteria	Actinomycetales	Micrococcaceae	Renibacterium
Herrera Paredes 2018	1	16	Bacteria	84	Actinobacteria	Actinobacteria	Actinomycetales	Mycobacteriaceae	Mycobacterium		UNC267MFSha1.1M11
Herrera Paredes 2018	1	17	Bacteria	84	Actinobacteria	Actinobacteria	Actinomycetales	Mycobacteriaceae	Mycobacterium		UNCCL9
Herrera Paredes 2018	1	18	Bacteria	84	Actinobacteria	Actinobacteria	Actinomycetales	Mycobacteriaceae	Mycobacterium
Herrera Paredes 2018	1	19	Bacteria	84	Actinobacteria	Actinobacteria	Actinomycetales	Mycobacteriaceae	Mycobacterium
Herrera Paredes 2018	1	20	Bacteria	84	Actinobacteria	Actinobacteria	Actinomycetales	Nocardiaceae	Millisia
Herrera Paredes 2018	1	21	Bacteria	84	Actinobacteria	Actinobacteria	Actinomycetales	Nocardiaceae	Rhodococcus		UNC363MFTsu5.1
Herrera Paredes 2018	1	22	Bacteria	84	Actinobacteria	Actinobacteria	Actinomycetales	Nocardiaceae	Rhodococcus
Herrera Paredes 2018	1	23	Bacteria	84	Actinobacteria	Actinobacteria	Actinomycetales	Nocardiaceae	Rhodococcus
Herrera Paredes 2018	1	24	Bacteria	84	Actinobacteria	Actinobacteria	Actinomycetales	Nocardioidaceae	Nocardioides		UNC345MFTsu5.1
Herrera Paredes 2018	1	25	Bacteria	84	Actinobacteria	Actinobacteria	Actinomycetales	Streptomycetaceae	Streptomyces		351MFTsu5.1
Herrera Paredes 2018	1	26	Bacteria	84	Actinobacteria	Actinobacteria	Corynebacteriales	Mycobacteriaceae	Mycobacterium		283MFTsu
Herrera Paredes 2018	1	27	Bacteria	84	Actinobacteria	Actinobacteria	Corynebacteriales	Nocardiaceae	Rhodococcus	erythropolis	339MFSha3.1
Herrera Paredes 2018	1	28	Bacteria	84	Actinobacteria	Actinobacteria	Corynebacteriales	Nocardiaceae	Rhodococcus	maanshanensis	259MFSha1.1
Herrera Paredes 2018	1	29	Bacteria	84	Actinobacteria	Actinobacteria	Micrococcales	Microbacteriaceae	Microbacterium	azadirachtae	CL89
Herrera Paredes 2018	1	30	Bacteria	84	Bacteroidetes	Sphingobacteriia	Sphingobacteriales	Sphingobacteriaceae	Pseudosphingobacterium
Herrera Paredes 2018	1	31	Bacteria	84	Firmicutes	Bacilli	Bacillales	Bacillaceae	Bacillus		123MFChir2
Herrera Paredes 2018	1	32	Bacteria	84	Firmicutes	Bacilli	Bacillales	Bacillaceae	Bacillus		215MF
Herrera Paredes 2018	1	33	Bacteria	84	Firmicutes	Bacilli	Bacillales	Bacillaceae	Bacillus		CL96
Herrera Paredes 2018	1	34	Bacteria	84	Firmicutes	Bacilli	Bacillales	Bacillaceae	Bacillus		UNC69MF
Herrera Paredes 2018	1	35	Bacteria	84	Firmicutes	Bacilli	Bacillales	Bacillaceae	Bacillus		UNCCL81
Herrera Paredes 2018	1	36	Bacteria	84	Firmicutes	Bacilli	Bacillales	Bacillaceae	Bacillus
Herrera Paredes 2018	1	37	Bacteria	84	Firmicutes	Bacilli	Bacillales	Bacillaceae	Bacillus
Herrera Paredes 2018	1	38	Bacteria	84	Firmicutes	Bacilli	Bacillales	Bacillaceae	Bacillus
Herrera Paredes 2018	1	39	Bacteria	84	Firmicutes	Bacilli	Bacillales	Bacillaceae	Bacillus
Herrera Paredes 2018	1	40	Bacteria	84	Firmicutes	Bacilli	Bacillales	Bacillaceae	Bacillus
Herrera Paredes 2018	1	41	Bacteria	84	Firmicutes	Bacilli	Bacillales	Bacillaceae	Bacillus
Herrera Paredes 2018	1	42	Bacteria	84	Firmicutes	Bacilli	Bacillales	Paenibacillaceae	Paenibacillus		UNC217MF
Herrera Paredes 2018	1	43	Bacteria	84	Firmicutes	Bacilli	Bacillales	Paenibacillaceae	Paenibacillus		UNC499MF
Herrera Paredes 2018	1	44	Bacteria	84	Firmicutes	Bacilli	Bacillales	Paenibacillaceae	Paenibacillus		UNCCL52
Herrera Paredes 2018	1	45	Bacteria	84	Firmicutes	Bacilli	Bacillales	Paenibacillaceae	Paenibacillus
Herrera Paredes 2018	1	46	Bacteria	84	unclassified	unclassified	unclassified	unclassified	unclassified
Herrera Paredes 2018	1	47	Bacteria	84	Proteobacteria	Alphaproteobacteria	Caulobacterales	Caulobacteraceae	Brevundimonas		CL04Tsu
Herrera Paredes 2018	1	48	Bacteria	84	Proteobacteria	Alphaproteobacteria	Rhizobiales	Brucellaceae	Falsochrobactrum
Herrera Paredes 2018	1	49	Bacteria	84	Proteobacteria	Alphaproteobacteria	Rhizobiales	Brucellaceae	Ochrobactrum		370MFChir3.1
Herrera Paredes 2018	1	50	Bacteria	84	Proteobacteria	Alphaproteobacteria	Rhizobiales	Methylobacteriaceae	Methylobacterium	brachiatum	111MFTsu3.1M4
Herrera Paredes 2018	1	51	Bacteria	84	Proteobacteria	Alphaproteobacteria	Rhizobiales	Methylobacteriaceae	Methylobacterium		13MFTsu3.1M2
Herrera Paredes 2018	1	52	Bacteria	84	Proteobacteria	Alphaproteobacteria	Rhizobiales	Methylobacteriaceae	Methylobacterium		275MFSha3.1
Herrera Paredes 2018	1	53	Bacteria	84	Proteobacteria	Alphaproteobacteria	Rhizobiales	Phyllobacteriaceae	Phyllobacterium
Herrera Paredes 2018	1	54	Bacteria	84	Proteobacteria	Alphaproteobacteria	Rhizobiales	Rhizobiaceae	Agrobacterium	tumefaciens	233MFSha2.1
Herrera Paredes 2018	1	55	Bacteria	84	Proteobacteria	Alphaproteobacteria	Rhizobiales	Rhizobiaceae	Agrobacterium	tumefaciens	CL32Tsu
Herrera Paredes 2018	1	56	Bacteria	84	Proteobacteria	Alphaproteobacteria	Rhizobiales	Rhizobiaceae	Agrobacterium		10MFCol1.1
Herrera Paredes 2018	1	57	Bacteria	84	Proteobacteria	Alphaproteobacteria	Rhizobiales	Rhizobiaceae	Agrobacterium		224MFTsu3.1
Herrera Paredes 2018	1	58	Bacteria	84	Proteobacteria	Alphaproteobacteria	Rhizobiales	Rhizobiaceae	Agrobacterium		33MFTa1.1
Herrera Paredes 2018	1	59	Bacteria	84	Proteobacteria	Alphaproteobacteria	Rhizobiales	Rhizobiaceae	Ciceribacter
Herrera Paredes 2018	1	60	Bacteria	84	Proteobacteria	Alphaproteobacteria	Rhizobiales	Rhizobiaceae	Ensifer
Herrera Paredes 2018	1	61	Bacteria	84	Proteobacteria	Alphaproteobacteria	Rhizobiales	Rhizobiaceae	Rhizobium		28MFCol1.1
Herrera Paredes 2018	1	62	Bacteria	84	Proteobacteria	Alphaproteobacteria	Rhizobiales	Rhizobiaceae	Rhizobium		IBUN
Herrera Paredes 2018	1	63	Bacteria	84	Proteobacteria	Alphaproteobacteria	Sphingomonadales	Sphingomonadaceae	Sphingomonas
Herrera Paredes 2018	1	64	Bacteria	84	Proteobacteria	Alphaproteobacteria	Sphingomonadales	Sphingomonadaceae	Sphingomonas
Herrera Paredes 2018	1	65	Bacteria	84	Proteobacteria	Betaproteobacteria	Burkholderiales	Burkholderiaceae	Burkholderia	bryophila	376MFSha3.1
Herrera Paredes 2018	1	66	Bacteria	84	Proteobacteria	Betaproteobacteria	Burkholderiales	Burkholderiaceae	Burkholderia		CL11
Herrera Paredes 2018	1	67	Bacteria	84	Proteobacteria	Betaproteobacteria	Burkholderiales	Burkholderiaceae	Burkholderia		MF384
Herrera Paredes 2018	1	68	Bacteria	84	Proteobacteria	Betaproteobacteria	Burkholderiales	Burkholderiaceae	Ralstonia		UNC404CL21Col
Herrera Paredes 2018	1	69	Bacteria	84	Proteobacteria	Betaproteobacteria	Burkholderiales	Comamonadaceae	Variovorax	paradoxus	295MFChir4.1
Herrera Paredes 2018	1	70	Bacteria	84	Proteobacteria	Betaproteobacteria	Burkholderiales	Comamonadaceae	Variovorax		278MFTsu5.1
Herrera Paredes 2018	1	71	Bacteria	84	Proteobacteria	Betaproteobacteria	Burkholderiales	Comamonadaceae	Variovorax		350MFTsu5.1
Herrera Paredes 2018	1	72	Bacteria	84	Proteobacteria	Betaproteobacteria	Burkholderiales	Comamonadaceae	Variovorax		375MFSha3.1
Herrera Paredes 2018	1	73	Bacteria	84	Proteobacteria	Betaproteobacteria	Burkholderiales	Comamonadaceae	Variovorax
Herrera Paredes 2018	1	74	Bacteria	84	Proteobacteria	Betaproteobacteria	Burkholderiales	Comamonadaceae	Variovorax
Herrera Paredes 2018	1	75	Bacteria	84	Proteobacteria	Betaproteobacteria	Burkholderiales	Comamonadaceae	Variovorax
Herrera Paredes 2018	1	76	Bacteria	84	Proteobacteria	Gammaproteobacteria	Pseudomonadales	Moraxellaceae	Acinetobacter
Herrera Paredes 2018	1	77	Bacteria	84	Proteobacteria	Gammaproteobacteria	Pseudomonadales	Moraxellaceae	Acinetobacter
Herrera Paredes 2018	1	78	Bacteria	84	Proteobacteria	Gammaproteobacteria	Pseudomonadales	Pseudomonadaceae	Pseudomonas	mandelii	36MFCvi1.1
Herrera Paredes 2018	1	79	Bacteria	84	Proteobacteria	Gammaproteobacteria	Pseudomonadales	Pseudomonadaceae	Pseudomonas	umsongensis	20MFCvi1.1
Herrera Paredes 2018	1	80	Bacteria	84	Proteobacteria	Gammaproteobacteria	Pseudomonadales	Pseudomonadaceae	Pseudomonas		113MF
Herrera Paredes 2018	1	81	Bacteria	84	Proteobacteria	Gammaproteobacteria	Pseudomonadales	Pseudomonadaceae	Pseudomonas
Herrera Paredes 2018	1	82	Bacteria	84	Proteobacteria	Gammaproteobacteria	Pseudomonadales	Pseudomonadaceae	Pseudomonas
Herrera Paredes 2018	1	83	Bacteria	84	Proteobacteria	Gammaproteobacteria	Xanthomonadales	Xanthomonadaceae	Luteibacter		329MFSha
Herrera Paredes 2018	1	84	Bacteria	84	Proteobacteria	Gammaproteobacteria	Xanthomonadales	Xanthomonadaceae	Stenotrophomonas
Burghardt 2018	1	1	Bacteria	101	Proteobacteria	Alphaproteobacteria	Rhizobiales	Rhizobiaceae	Ensifer	meliloti	1008
Burghardt 2018	1	2	Bacteria	101	Proteobacteria	Alphaproteobacteria	Rhizobiales	Rhizobiaceae	Ensifer	meliloti	1018
Burghardt 2018	1	3	Bacteria	101	Proteobacteria	Alphaproteobacteria	Rhizobiales	Rhizobiaceae	Ensifer	meliloti	1022
Burghardt 2018	1	4	Bacteria	101	Proteobacteria	Alphaproteobacteria	Rhizobiales	Rhizobiaceae	Ensifer	meliloti	1023
Burghardt 2018	1	5	Bacteria	101	Proteobacteria	Alphaproteobacteria	Rhizobiales	Rhizobiaceae	Ensifer	meliloti	1027
Burghardt 2018	1	6	Bacteria	101	Proteobacteria	Alphaproteobacteria	Rhizobiales	Rhizobiaceae	Ensifer	meliloti	1031
Burghardt 2018	1	7	Bacteria	101	Proteobacteria	Alphaproteobacteria	Rhizobiales	Rhizobiaceae	Ensifer	meliloti	1107
Burghardt 2018	1	8	Bacteria	101	Proteobacteria	Alphaproteobacteria	Rhizobiales	Rhizobiaceae	Ensifer	meliloti	1158
Burghardt 2018	1	9	Bacteria	101	Proteobacteria	Alphaproteobacteria	Rhizobiales	Rhizobiaceae	Ensifer	meliloti	1162
Burghardt 2018	1	10	Bacteria	101	Proteobacteria	Alphaproteobacteria	Rhizobiales	Rhizobiaceae	Ensifer	meliloti	1163
Burghardt 2018	1	11	Bacteria	101	Proteobacteria	Alphaproteobacteria	Rhizobiales	Rhizobiaceae	Ensifer	meliloti	1170
Burghardt 2018	1	12	Bacteria	101	Proteobacteria	Alphaproteobacteria	Rhizobiales	Rhizobiaceae	Ensifer	meliloti	1171
Burghardt 2018	1	13	Bacteria	101	Proteobacteria	Alphaproteobacteria	Rhizobiales	Rhizobiaceae	Ensifer	meliloti	1180
Burghardt 2018	1	14	Bacteria	101	Proteobacteria	Alphaproteobacteria	Rhizobiales	Rhizobiaceae	Ensifer	meliloti	1183
Burghardt 2018	1	15	Bacteria	101	Proteobacteria	Alphaproteobacteria	Rhizobiales	Rhizobiaceae	Ensifer	meliloti	1198
Burghardt 2018	1	16	Bacteria	101	Proteobacteria	Alphaproteobacteria	Rhizobiales	Rhizobiaceae	Ensifer	meliloti	1214
Burghardt 2018	1	17	Bacteria	101	Proteobacteria	Alphaproteobacteria	Rhizobiales	Rhizobiaceae	Ensifer	meliloti	1221
Burghardt 2018	1	18	Bacteria	101	Proteobacteria	Alphaproteobacteria	Rhizobiales	Rhizobiaceae	Ensifer	meliloti	1225
Burghardt 2018	1	19	Bacteria	101	Proteobacteria	Alphaproteobacteria	Rhizobiales	Rhizobiaceae	Ensifer	meliloti	1227
Burghardt 2018	1	20	Bacteria	101	Proteobacteria	Alphaproteobacteria	Rhizobiales	Rhizobiaceae	Ensifer	meliloti	1248
Burghardt 2018	1	21	Bacteria	101	Proteobacteria	Alphaproteobacteria	Rhizobiales	Rhizobiaceae	Ensifer	meliloti	1264
Burghardt 2018	1	22	Bacteria	101	Proteobacteria	Alphaproteobacteria	Rhizobiales	Rhizobiaceae	Ensifer	meliloti	1280
Burghardt 2018	1	23	Bacteria	101	Proteobacteria	Alphaproteobacteria	Rhizobiales	Rhizobiaceae	Ensifer	meliloti	1289
Burghardt 2018	1	24	Bacteria	101	Proteobacteria	Alphaproteobacteria	Rhizobiales	Rhizobiaceae	Ensifer	meliloti	1302
Burghardt 2018	1	25	Bacteria	101	Proteobacteria	Alphaproteobacteria	Rhizobiales	Rhizobiaceae	Ensifer	meliloti	1308
Burghardt 2018	1	26	Bacteria	101	Proteobacteria	Alphaproteobacteria	Rhizobiales	Rhizobiaceae	Ensifer	meliloti	1335
Burghardt 2018	1	27	Bacteria	101	Proteobacteria	Alphaproteobacteria	Rhizobiales	Rhizobiaceae	Ensifer	meliloti	1336
Burghardt 2018	1	28	Bacteria	101	Proteobacteria	Alphaproteobacteria	Rhizobiales	Rhizobiaceae	Ensifer	meliloti	1357
Burghardt 2018	1	29	Bacteria	101	Proteobacteria	Alphaproteobacteria	Rhizobiales	Rhizobiaceae	Ensifer	meliloti	1379
Burghardt 2018	1	30	Bacteria	101	Proteobacteria	Alphaproteobacteria	Rhizobiales	Rhizobiaceae	Ensifer	meliloti	1389
Burghardt 2018	1	31	Bacteria	101	Proteobacteria	Alphaproteobacteria	Rhizobiales	Rhizobiaceae	Ensifer	meliloti	1397
Burghardt 2018	1	32	Bacteria	101	Proteobacteria	Alphaproteobacteria	Rhizobiales	Rhizobiaceae	Ensifer	meliloti	1462
Burghardt 2018	1	33	Bacteria	101	Proteobacteria	Alphaproteobacteria	Rhizobiales	Rhizobiaceae	Ensifer	meliloti	1463
Burghardt 2018	1	34	Bacteria	101	Proteobacteria	Alphaproteobacteria	Rhizobiales	Rhizobiaceae	Ensifer	meliloti	1464
Burghardt 2018	1	35	Bacteria	101	Proteobacteria	Alphaproteobacteria	Rhizobiales	Rhizobiaceae	Ensifer	meliloti	1467
Burghardt 2018	1	36	Bacteria	101	Proteobacteria	Alphaproteobacteria	Rhizobiales	Rhizobiaceae	Ensifer	meliloti	1491
Burghardt 2018	1	37	Bacteria	101	Proteobacteria	Alphaproteobacteria	Rhizobiales	Rhizobiaceae	Ensifer	meliloti	1508
Burghardt 2018	1	38	Bacteria	101	Proteobacteria	Alphaproteobacteria	Rhizobiales	Rhizobiaceae	Ensifer	meliloti	1519
Burghardt 2018	1	39	Bacteria	101	Proteobacteria	Alphaproteobacteria	Rhizobiales	Rhizobiaceae	Ensifer	meliloti	1520
Burghardt 2018	1	40	Bacteria	101	Proteobacteria	Alphaproteobacteria	Rhizobiales	Rhizobiaceae	Ensifer	meliloti	1530
Burghardt 2018	1	41	Bacteria	101	Proteobacteria	Alphaproteobacteria	Rhizobiales	Rhizobiaceae	Ensifer	meliloti	1533
Burghardt 2018	1	42	Bacteria	101	Proteobacteria	Alphaproteobacteria	Rhizobiales	Rhizobiaceae	Ensifer	meliloti	1550
Burghardt 2018	1	43	Bacteria	101	Proteobacteria	Alphaproteobacteria	Rhizobiales	Rhizobiaceae	Ensifer	meliloti	1562
Burghardt 2018	1	44	Bacteria	101	Proteobacteria	Alphaproteobacteria	Rhizobiales	Rhizobiaceae	Ensifer	meliloti	1565
Burghardt 2018	1	45	Bacteria	101	Proteobacteria	Alphaproteobacteria	Rhizobiales	Rhizobiaceae	Ensifer	meliloti	1566
Burghardt 2018	1	46	Bacteria	101	Proteobacteria	Alphaproteobacteria	Rhizobiales	Rhizobiaceae	Ensifer	meliloti	1581
Burghardt 2018	1	47	Bacteria	101	Proteobacteria	Alphaproteobacteria	Rhizobiales	Rhizobiaceae	Ensifer	meliloti	1583
Burghardt 2018	1	48	Bacteria	101	Proteobacteria	Alphaproteobacteria	Rhizobiales	Rhizobiaceae	Ensifer	meliloti	1589
Burghardt 2018	1	49	Bacteria	101	Proteobacteria	Alphaproteobacteria	Rhizobiales	Rhizobiaceae	Ensifer	meliloti	1591
Burghardt 2018	1	50	Bacteria	101	Proteobacteria	Alphaproteobacteria	Rhizobiales	Rhizobiaceae	Ensifer	meliloti	1593
Burghardt 2018	1	51	Bacteria	101	Proteobacteria	Alphaproteobacteria	Rhizobiales	Rhizobiaceae	Ensifer	meliloti	1594
Burghardt 2018	1	52	Bacteria	101	Proteobacteria	Alphaproteobacteria	Rhizobiales	Rhizobiaceae	Ensifer	meliloti	1612
Burghardt 2018	1	53	Bacteria	101	Proteobacteria	Alphaproteobacteria	Rhizobiales	Rhizobiaceae	Ensifer	meliloti	1613
Burghardt 2018	1	54	Bacteria	101	Proteobacteria	Alphaproteobacteria	Rhizobiales	Rhizobiaceae	Ensifer	meliloti	1614
Burghardt 2018	1	55	Bacteria	101	Proteobacteria	Alphaproteobacteria	Rhizobiales	Rhizobiaceae	Ensifer	meliloti	1616
Burghardt 2018	1	56	Bacteria	101	Proteobacteria	Alphaproteobacteria	Rhizobiales	Rhizobiaceae	Ensifer	meliloti	1617
Burghardt 2018	1	57	Bacteria	101	Proteobacteria	Alphaproteobacteria	Rhizobiales	Rhizobiaceae	Ensifer	meliloti	1623
Burghardt 2018	1	58	Bacteria	101	Proteobacteria	Alphaproteobacteria	Rhizobiales	Rhizobiaceae	Ensifer	meliloti	1626
Burghardt 2018	1	59	Bacteria	101	Proteobacteria	Alphaproteobacteria	Rhizobiales	Rhizobiaceae	Ensifer	meliloti	1655
Burghardt 2018	1	60	Bacteria	101	Proteobacteria	Alphaproteobacteria	Rhizobiales	Rhizobiaceae	Ensifer	meliloti	1656
Burghardt 2018	1	61	Bacteria	101	Proteobacteria	Alphaproteobacteria	Rhizobiales	Rhizobiaceae	Ensifer	meliloti	1659
Burghardt 2018	1	62	Bacteria	101	Proteobacteria	Alphaproteobacteria	Rhizobiales	Rhizobiaceae	Ensifer	meliloti	1660
Burghardt 2018	1	63	Bacteria	101	Proteobacteria	Alphaproteobacteria	Rhizobiales	Rhizobiaceae	Ensifer	meliloti	1661
Burghardt 2018	1	64	Bacteria	101	Proteobacteria	Alphaproteobacteria	Rhizobiales	Rhizobiaceae	Ensifer	meliloti	1666
Burghardt 2018	1	65	Bacteria	101	Proteobacteria	Alphaproteobacteria	Rhizobiales	Rhizobiaceae	Ensifer	meliloti	1676
Burghardt 2018	1	66	Bacteria	101	Proteobacteria	Alphaproteobacteria	Rhizobiales	Rhizobiaceae	Ensifer	meliloti	1678
Burghardt 2018	1	67	Bacteria	101	Proteobacteria	Alphaproteobacteria	Rhizobiales	Rhizobiaceae	Ensifer	meliloti	1687
Burghardt 2018	1	68	Bacteria	101	Proteobacteria	Alphaproteobacteria	Rhizobiales	Rhizobiaceae	Ensifer	meliloti	1691
Burghardt 2018	1	69	Bacteria	101	Proteobacteria	Alphaproteobacteria	Rhizobiales	Rhizobiaceae	Ensifer	meliloti	1692
Burghardt 2018	1	70	Bacteria	101	Proteobacteria	Alphaproteobacteria	Rhizobiales	Rhizobiaceae	Ensifer	meliloti	1696
Burghardt 2018	1	71	Bacteria	101	Proteobacteria	Alphaproteobacteria	Rhizobiales	Rhizobiaceae	Ensifer	meliloti	1699
Burghardt 2018	1	72	Bacteria	101	Proteobacteria	Alphaproteobacteria	Rhizobiales	Rhizobiaceae	Ensifer	meliloti	1700
Burghardt 2018	1	73	Bacteria	101	Proteobacteria	Alphaproteobacteria	Rhizobiales	Rhizobiaceae	Ensifer	meliloti	1702
Burghardt 2018	1	74	Bacteria	101	Proteobacteria	Alphaproteobacteria	Rhizobiales	Rhizobiaceae	Ensifer	meliloti	1703
Burghardt 2018	1	75	Bacteria	101	Proteobacteria	Alphaproteobacteria	Rhizobiales	Rhizobiaceae	Ensifer	meliloti	1706
Burghardt 2018	1	76	Bacteria	101	Proteobacteria	Alphaproteobacteria	Rhizobiales	Rhizobiaceae	Ensifer	meliloti	1708
Burghardt 2018	1	77	Bacteria	101	Proteobacteria	Alphaproteobacteria	Rhizobiales	Rhizobiaceae	Ensifer	meliloti	1710
Burghardt 2018	1	78	Bacteria	101	Proteobacteria	Alphaproteobacteria	Rhizobiales	Rhizobiaceae	Ensifer	meliloti	1719
Burghardt 2018	1	79	Bacteria	101	Proteobacteria	Alphaproteobacteria	Rhizobiales	Rhizobiaceae	Ensifer	meliloti	1724
Burghardt 2018	1	80	Bacteria	101	Proteobacteria	Alphaproteobacteria	Rhizobiales	Rhizobiaceae	Ensifer	meliloti	1734
Burghardt 2018	1	81	Bacteria	101	Proteobacteria	Alphaproteobacteria	Rhizobiales	Rhizobiaceae	Ensifer	meliloti	1742
Burghardt 2018	1	82	Bacteria	101	Proteobacteria	Alphaproteobacteria	Rhizobiales	Rhizobiaceae	Ensifer	meliloti	1751
Burghardt 2018	1	83	Bacteria	101	Proteobacteria	Alphaproteobacteria	Rhizobiales	Rhizobiaceae	Ensifer	meliloti	1760
Burghardt 2018	1	84	Bacteria	101	Proteobacteria	Alphaproteobacteria	Rhizobiales	Rhizobiaceae	Ensifer	meliloti	1767
Burghardt 2018	1	85	Bacteria	101	Proteobacteria	Alphaproteobacteria	Rhizobiales	Rhizobiaceae	Ensifer	meliloti	1770
Burghardt 2018	1	86	Bacteria	101	Proteobacteria	Alphaproteobacteria	Rhizobiales	Rhizobiaceae	Ensifer	meliloti	1777
Burghardt 2018	1	87	Bacteria	101	Proteobacteria	Alphaproteobacteria	Rhizobiales	Rhizobiaceae	Ensifer	meliloti	1787
Burghardt 2018	1	88	Bacteria	101	Proteobacteria	Alphaproteobacteria	Rhizobiales	Rhizobiaceae	Ensifer	meliloti	1788
Burghardt 2018	1	89	Bacteria	101	Proteobacteria	Alphaproteobacteria	Rhizobiales	Rhizobiaceae	Ensifer	meliloti	1791
Burghardt 2018	1	90	Bacteria	101	Proteobacteria	Alphaproteobacteria	Rhizobiales	Rhizobiaceae	Ensifer	meliloti	1792
Burghardt 2018	1	91	Bacteria	101	Proteobacteria	Alphaproteobacteria	Rhizobiales	Rhizobiaceae	Ensifer	meliloti	1793
Burghardt 2018	1	92	Bacteria	101	Proteobacteria	Alphaproteobacteria	Rhizobiales	Rhizobiaceae	Ensifer	meliloti	1794
Burghardt 2018	1	93	Bacteria	101	Proteobacteria	Alphaproteobacteria	Rhizobiales	Rhizobiaceae	Ensifer	meliloti	1795
Burghardt 2018	1	94	Bacteria	101	Proteobacteria	Alphaproteobacteria	Rhizobiales	Rhizobiaceae	Ensifer	meliloti	1796
Burghardt 2018	1	95	Bacteria	101	Proteobacteria	Alphaproteobacteria	Rhizobiales	Rhizobiaceae	Ensifer	meliloti	1803
Burghardt 2018	1	96	Bacteria	101	Proteobacteria	Alphaproteobacteria	Rhizobiales	Rhizobiaceae	Ensifer	meliloti	1804
Burghardt 2018	1	97	Bacteria	101	Proteobacteria	Alphaproteobacteria	Rhizobiales	Rhizobiaceae	Ensifer	meliloti	1808
Burghardt 2018	1	98	Bacteria	101	Proteobacteria	Alphaproteobacteria	Rhizobiales	Rhizobiaceae	Ensifer	meliloti	1819
Burghardt 2018	1	99	Bacteria	101	Proteobacteria	Alphaproteobacteria	Rhizobiales	Rhizobiaceae	Ensifer	meliloti	1883
Burghardt 2018	1	100	Bacteria	101	Proteobacteria	Alphaproteobacteria	Rhizobiales	Rhizobiaceae	Ensifer	meliloti	1919
Burghardt 2018	1	101	Bacteria	101	Proteobacteria	Alphaproteobacteria	Rhizobiales	Rhizobiaceae	Ensifer	meliloti	3011
Durán 2018	1	1	Bacteria	148	Actinobacteria	Actinobacteria	Actinomycetales	Cellulomonadaceae	Cellulomonas		Root137
Durán 2018	1	2	Bacteria	148	Actinobacteria	Actinobacteria	Actinomycetales	Cellulomonadaceae	Oerskovia		Root22
Durán 2018	1	3	Bacteria	148	Actinobacteria	Actinobacteria	Actinomycetales	Microbacteriaceae	Agromyces		Root81
Durán 2018	1	4	Bacteria	148	Actinobacteria	Actinobacteria	Actinomycetales	Microbacteriaceae	Agromyces		Soil535
Durán 2018	1	5	Bacteria	148	Actinobacteria	Actinobacteria	Actinomycetales	Microbacteriaceae	Leifsonia		Root4
Durán 2018	1	6	Bacteria	148	Actinobacteria	Actinobacteria	Actinomycetales	Microbacteriaceae	Leifsonia		Root60
Durán 2018	1	7	Bacteria	148	Actinobacteria	Actinobacteria	Actinomycetales	Microbacteriaceae	Microbacterium		Root53
Durán 2018	1	8	Bacteria	148	Actinobacteria	Actinobacteria	Actinomycetales	Microbacteriaceae	Microbacterium		Root61
Durán 2018	1	9	Bacteria	148	Actinobacteria	Actinobacteria	Actinomycetales	Microbacteriaceae	Yonghaparkia		Soil809
Durán 2018	1	10	Bacteria	148	Actinobacteria	Actinobacteria	Actinomycetales	Micrococcaceae	Arthrobacter		Soil736
Durán 2018	1	11	Bacteria	148	Actinobacteria	Actinobacteria	Actinomycetales	Micrococcaceae	Arthrobacter		Soil761
Durán 2018	1	12	Bacteria	148	Actinobacteria	Actinobacteria	Actinomycetales	Micrococcaceae	Arthrobacter		Soil762
Durán 2018	1	13	Bacteria	148	Actinobacteria	Actinobacteria	Actinomycetales	Micrococcaceae	Arthrobacter		Soil763
Durán 2018	1	14	Bacteria	148	Actinobacteria	Actinobacteria	Actinomycetales	Micrococcaceae	Arthrobacter		Soil782
Durán 2018	1	15	Bacteria	148	Actinobacteria	Actinobacteria	Actinomycetales	Micrococcaceae	Arthrobacter		Soil764
Durán 2018	1	16	Bacteria	148	Actinobacteria	Actinobacteria	Actinomycetales	Micrococcaceae	Arthrobacter		Soil783
Durán 2018	1	17	Bacteria	148	Actinobacteria	Actinobacteria	Actinomycetales	Mycobacteriaceae	Mycobacterium		Root135
Durán 2018	1	18	Bacteria	148	Actinobacteria	Actinobacteria	Actinomycetales	Mycobacteriaceae	Mycobacterium		Soil538
Durán 2018	1	19	Bacteria	148	Actinobacteria	Actinobacteria	Actinomycetales	Nocardiaceae	Nocardia		Root136
Durán 2018	1	20	Bacteria	148	Actinobacteria	Actinobacteria	Actinomycetales	Nocardioidaceae	Aeromicrobium		Root236
Durán 2018	1	21	Bacteria	148	Actinobacteria	Actinobacteria	Actinomycetales	Nocardioidaceae	Aeromicrobium		Root701D2
Durán 2018	1	22	Bacteria	148	Actinobacteria	Actinobacteria	Actinomycetales	Nocardioidaceae	Nocardioides		Root79
Durán 2018	1	23	Bacteria	148	Actinobacteria	Actinobacteria	Actinomycetales	Nocardioidaceae	Nocardioides		Root122
Durán 2018	1	24	Bacteria	148	Actinobacteria	Actinobacteria	Actinomycetales	Nocardioidaceae	Nocardioides		Root240
Durán 2018	1	25	Bacteria	148	Actinobacteria	Actinobacteria	Actinomycetales	Nocardioidaceae	Nocardioides		Root614
Durán 2018	1	26	Bacteria	148	Actinobacteria	Actinobacteria	Actinomycetales	Nocardioidaceae	Nocardioides		Root682
Durán 2018	1	27	Bacteria	148	Actinobacteria	Actinobacteria	Actinomycetales	Nocardioidaceae	Nocardioides		Soil777
Durán 2018	1	28	Bacteria	148	Actinobacteria	Actinobacteria	Actinomycetales	Nocardioidaceae	Nocardioides		Root140
Durán 2018	1	29	Bacteria	148	Actinobacteria	Actinobacteria	Actinomycetales	Nocardioidaceae	Nocardioides		Soil797
Durán 2018	1	30	Bacteria	148	Actinobacteria	Actinobacteria	Actinomycetales	Streptomycetaceae	Kitasatospora		Root107
Durán 2018	1	31	Bacteria	148	Actinobacteria	Actinobacteria	Actinomycetales	Streptomycetaceae	Kitasatospora		Root187
Durán 2018	1	32	Bacteria	148	Actinobacteria	Actinobacteria	Actinomycetales	Streptomycetaceae	Streptomyces		Root63
Durán 2018	1	33	Bacteria	148	Actinobacteria	Actinobacteria	Actinomycetales	Streptomycetaceae	Streptomyces		Root66
Durán 2018	1	34	Bacteria	148	Actinobacteria	Actinobacteria	Actinomycetales	Streptomycetaceae	Streptomyces		Root369
Durán 2018	1	35	Bacteria	148	Actinobacteria	Actinobacteria	Actinomycetales	Streptomycetaceae	Streptomyces		Root431
Durán 2018	1	36	Bacteria	148	Actinobacteria	Actinobacteria	Actinomycetales	Streptomycetaceae	Streptomyces		Root1295
Durán 2018	1	37	Bacteria	148	Actinobacteria	Actinobacteria	Actinomycetales	Streptomycetaceae	Streptomyces		Root1310
Durán 2018	1	38	Bacteria	148	Actinobacteria	Actinobacteria	Actinomycetales	Streptomycetaceae	Streptomyces		Root66D1
Durán 2018	1	39	Bacteria	148	Actinobacteria	Actinobacteria	Actinomycetales	Streptomycetaceae	Streptomyces		Root264
Durán 2018	1	40	Bacteria	148	Actinobacteria	Actinobacteria	Actinomycetales	Streptomycetaceae	Streptomyces		Root1319
Durán 2018	1	41	Bacteria	148	Actinobacteria	Actinobacteria	Micrococcales	Intrasporangiaceae	Janibacter		Soil728
Durán 2018	1	42	Bacteria	148	Actinobacteria	Actinobacteria	Micrococcales	Intrasporangiaceae	Knoellia		Soil729
Durán 2018	1	43	Bacteria	148	Actinobacteria	Actinobacteria	Micrococcales	Intrasporangiaceae	Phycicoccus		Soil748
Durán 2018	1	44	Bacteria	148	Actinobacteria	Actinobacteria	Micrococcales	Intrasporangiaceae	Phycicoccus		Soil803
Durán 2018	1	45	Bacteria	148	Actinobacteria	Actinobacteria	Micrococcales	Intrasporangiaceae	Tetrasphaera		Soil756
Durán 2018	1	46	Bacteria	148	Bacteroidetes	Flavobacteriia	Flavobacteriales	Flavobacteriaceae	Flavobacterium		Root901
Durán 2018	1	47	Bacteria	148	Firmicutes	Bacilli	Bacillales	Bacillaceae	Bacillus		Root147
Durán 2018	1	48	Bacteria	148	Firmicutes	Bacilli	Bacillales	Bacillaceae	Bacillus		Soil745
Durán 2018	1	49	Bacteria	148	Firmicutes	Bacilli	Bacillales	Bacillaceae	Bacillus		Soil768D1
Durán 2018	1	50	Bacteria	148	Firmicutes	Bacilli	Bacillales	Bacillaceae	Bacillus		Soil744D2
Durán 2018	1	51	Bacteria	148	Firmicutes	Bacilli	Bacillales	Paenibacillaceae	Paenibacillus		Soil522
Durán 2018	1	52	Bacteria	148	Firmicutes	Bacilli	Bacillales	Paenibacillaceae	Paenibacillus		Soil519D3
Durán 2018	1	53	Bacteria	148	Firmicutes	Bacilli	Bacillales	Paenibacillaceae	Paenibacillus		Soil724D2
Durán 2018	1	54	Bacteria	148	Firmicutes	Bacilli	Bacillales	Paenibacillaceae	Paenibacillus		Soil787
Durán 2018	1	55	Bacteria	148	Proteobacteria	Alphaproteobacteria	Caulobacterales	Caulobacteraceae	Brevundimonas		Root1279
Durán 2018	1	56	Bacteria	148	Proteobacteria	Alphaproteobacteria	Caulobacterales	Caulobacteraceae	Caulobacter		Root342
Durán 2018	1	57	Bacteria	148	Proteobacteria	Alphaproteobacteria	Caulobacterales	Caulobacteraceae	Caulobacter		Root343
Durán 2018	1	58	Bacteria	148	Proteobacteria	Alphaproteobacteria	Caulobacterales	Caulobacteraceae	Caulobacter		Root656
Durán 2018	1	59	Bacteria	148	Proteobacteria	Alphaproteobacteria	Caulobacterales	Caulobacteraceae	Caulobacter		Root487D2Y
Durán 2018	1	60	Bacteria	148	Proteobacteria	Alphaproteobacteria	Caulobacterales	Caulobacteraceae	Caulobacter		Root1455
Durán 2018	1	61	Bacteria	148	Proteobacteria	Alphaproteobacteria	Caulobacterales	Caulobacteraceae	Caulobacter		Root487D2Y
Durán 2018	1	62	Bacteria	148	Proteobacteria	Alphaproteobacteria	Caulobacterales	Caulobacteraceae	Phenylobacterium		Root700
Durán 2018	1	63	Bacteria	148	Proteobacteria	Alphaproteobacteria	Caulobacterales	Caulobacteraceae	Phenylobacterium		Root1277
Durán 2018	1	64	Bacteria	148	Proteobacteria	Alphaproteobacteria	Rhizobiales	Bradyrhizobiaceae	Bosea		Root381
Durán 2018	1	65	Bacteria	148	Proteobacteria	Alphaproteobacteria	Rhizobiales	Bradyrhizobiaceae	Bosea		Root670
Durán 2018	1	66	Bacteria	148	Proteobacteria	Alphaproteobacteria	Rhizobiales	Bradyrhizobiaceae	Bosea		Root483D1
Durán 2018	1	67	Bacteria	148	Proteobacteria	Alphaproteobacteria	Rhizobiales	Hyphomicrobiaceae	Devosia		Root105
Durán 2018	1	68	Bacteria	148	Proteobacteria	Alphaproteobacteria	Rhizobiales	Hyphomicrobiaceae	Devosia		Root436
Durán 2018	1	69	Bacteria	148	Proteobacteria	Alphaproteobacteria	Rhizobiales	Hyphomicrobiaceae	Devosia		Root685
Durán 2018	1	70	Bacteria	148	Proteobacteria	Alphaproteobacteria	Rhizobiales	Hyphomicrobiaceae	Devosia		Root413D1
Durán 2018	1	71	Bacteria	148	Proteobacteria	Alphaproteobacteria	Rhizobiales	Hyphomicrobiaceae	Devosia		Root635
Durán 2018	1	72	Bacteria	148	Proteobacteria	Alphaproteobacteria	Rhizobiales	Phyllobacteriaceae	Aminobacter		Root100
Durán 2018	1	73	Bacteria	148	Proteobacteria	Alphaproteobacteria	Rhizobiales	Phyllobacteriaceae	Hoeflea		Root268
Durán 2018	1	74	Bacteria	148	Proteobacteria	Alphaproteobacteria	Rhizobiales	Phyllobacteriaceae	Hoeflea		Root1212
Durán 2018	1	75	Bacteria	148	Proteobacteria	Alphaproteobacteria	Rhizobiales	Phyllobacteriaceae	Mesorhizobium		Root102
Durán 2018	1	76	Bacteria	148	Proteobacteria	Alphaproteobacteria	Rhizobiales	Rhizobiaceae	Ensifer		Root31
Durán 2018	1	77	Bacteria	148	Proteobacteria	Alphaproteobacteria	Rhizobiales	Rhizobiaceae	Ensifer		Root74
Durán 2018	1	78	Bacteria	148	Proteobacteria	Alphaproteobacteria	Rhizobiales	Rhizobiaceae	Ensifer		Root86
Durán 2018	1	79	Bacteria	148	Proteobacteria	Alphaproteobacteria	Rhizobiales	Rhizobiaceae	Ensifer		Root127
Durán 2018	1	80	Bacteria	148	Proteobacteria	Alphaproteobacteria	Rhizobiales	Rhizobiaceae	Ensifer		Root142
Durán 2018	1	81	Bacteria	148	Proteobacteria	Alphaproteobacteria	Rhizobiales	Rhizobiaceae	Ensifer		Root231
Durán 2018	1	82	Bacteria	148	Proteobacteria	Alphaproteobacteria	Rhizobiales	Rhizobiaceae	Ensifer		Root258
Durán 2018	1	83	Bacteria	148	Proteobacteria	Alphaproteobacteria	Rhizobiales	Rhizobiaceae	Ensifer		Root278
Durán 2018	1	84	Bacteria	148	Proteobacteria	Alphaproteobacteria	Rhizobiales	Rhizobiaceae	Ensifer		Root423
Durán 2018	1	85	Bacteria	148	Proteobacteria	Alphaproteobacteria	Rhizobiales	Rhizobiaceae	Ensifer		Root558
Durán 2018	1	86	Bacteria	148	Proteobacteria	Alphaproteobacteria	Rhizobiales	Rhizobiaceae	Ensifer		Root954
Durán 2018	1	87	Bacteria	148	Proteobacteria	Alphaproteobacteria	Rhizobiales	Rhizobiaceae	Ensifer		Root1252
Durán 2018	1	88	Bacteria	148	Proteobacteria	Alphaproteobacteria	Rhizobiales	Rhizobiaceae	Rhizobium		Root73
Durán 2018	1	89	Bacteria	148	Proteobacteria	Alphaproteobacteria	Rhizobiales	Rhizobiaceae	Rhizobium		Root482
Durán 2018	1	90	Bacteria	148	Proteobacteria	Alphaproteobacteria	Rhizobiales	Rhizobiaceae	Rhizobium		Root491
Durán 2018	1	91	Bacteria	148	Proteobacteria	Alphaproteobacteria	Rhizobiales	Rhizobiaceae	Rhizobium		Root564
Durán 2018	1	92	Bacteria	148	Proteobacteria	Alphaproteobacteria	Rhizobiales	Rhizobiaceae	Rhizobium		Root621
Durán 2018	1	93	Bacteria	148	Proteobacteria	Alphaproteobacteria	Rhizobiales	Rhizobiaceae	Rhizobium		Root651
Durán 2018	1	94	Bacteria	148	Proteobacteria	Alphaproteobacteria	Rhizobiales	Rhizobiaceae	Rhizobium		Root679
Durán 2018	1	95	Bacteria	148	Proteobacteria	Alphaproteobacteria	Rhizobiales	Rhizobiaceae	Rhizobium		Root680
Durán 2018	1	96	Bacteria	148	Proteobacteria	Alphaproteobacteria	Rhizobiales	Rhizobiaceae	Rhizobium		Root708
Durán 2018	1	97	Bacteria	148	Proteobacteria	Alphaproteobacteria	Rhizobiales	Rhizobiaceae	Rhizobium		Root1203
Durán 2018	1	98	Bacteria	148	Proteobacteria	Alphaproteobacteria	Rhizobiales	Rhizobiaceae	Rhizobium		Root1204
Durán 2018	1	99	Bacteria	148	Proteobacteria	Alphaproteobacteria	Rhizobiales	Rhizobiaceae	Rhizobium		Root1220
Durán 2018	1	100	Bacteria	148	Proteobacteria	Alphaproteobacteria	Rhizobiales	Rhizobiaceae	Rhizobium		Root482D2
Durán 2018	1	101	Bacteria	148	Proteobacteria	Alphaproteobacteria	Rhizobiales	Rhizobiaceae	Rhizobium		Root483D2
Durán 2018	1	102	Bacteria	148	Proteobacteria	Alphaproteobacteria	Rhizobiales	Xanthobacteraceae	Pseudolabrys		Root1462
Durán 2018	1	103	Bacteria	148	Proteobacteria	Alphaproteobacteria	Sphingomonadales	Sphingomonadaceae	Sphingomonas		Root50
Durán 2018	1	104	Bacteria	148	Proteobacteria	Alphaproteobacteria	Sphingomonadales	Sphingomonadaceae	Sphingomonas		Root710
Durán 2018	1	105	Bacteria	148	Proteobacteria	Alphaproteobacteria	Sphingomonadales	Sphingomonadaceae	Sphingomonas		Root720
Durán 2018	1	106	Bacteria	148	Proteobacteria	Alphaproteobacteria	Sphingomonadales	Sphingomonadaceae	Sphingomonas		Root1294
Durán 2018	1	107	Bacteria	148	Proteobacteria	Alphaproteobacteria	Sphingomonadales	Sphingomonadaceae	Sphingopyxis		Root154
Durán 2018	1	108	Bacteria	148	Proteobacteria	Alphaproteobacteria	Sphingomonadales	Sphingomonadaceae	Sphingopyxis		Root214
Durán 2018	1	109	Bacteria	148	Proteobacteria	Alphaproteobacteria	Sphingomonadales	Sphingomonadaceae	Sphingopyxis		Root1497
Durán 2018	1	110	Bacteria	148	Proteobacteria	Betaproteobacteria	Burkholderiales	Alcaligenaceae	Bordetella		Root83
Durán 2018	1	111	Bacteria	148	Proteobacteria	Betaproteobacteria	Burkholderiales	Burkholderiaceae	Cupriavidus		Root919
Durán 2018	1	112	Bacteria	148	Proteobacteria	Betaproteobacteria	Burkholderiales	Comamonadaceae	Acidovorax		Root70
Durán 2018	1	113	Bacteria	148	Proteobacteria	Betaproteobacteria	Burkholderiales	Comamonadaceae	Acidovorax		Root217
Durán 2018	1	114	Bacteria	148	Proteobacteria	Betaproteobacteria	Burkholderiales	Comamonadaceae	Acidovorax		Root219
Durán 2018	1	115	Bacteria	148	Proteobacteria	Betaproteobacteria	Burkholderiales	Comamonadaceae	Acidovorax		Root275
Durán 2018	1	116	Bacteria	148	Proteobacteria	Betaproteobacteria	Burkholderiales	Comamonadaceae	Acidovorax		Root402
Durán 2018	1	117	Bacteria	148	Proteobacteria	Betaproteobacteria	Burkholderiales	Comamonadaceae	Pelomonas		Root1217
Durán 2018	1	118	Bacteria	148	Proteobacteria	Betaproteobacteria	Burkholderiales	Comamonadaceae	Variovorax		Root411
Durán 2018	1	119	Bacteria	148	Proteobacteria	Betaproteobacteria	Burkholderiales	Comamonadaceae	Variovorax		Root434
Durán 2018	1	120	Bacteria	148	Proteobacteria	Betaproteobacteria	Burkholderiales	Comamonadaceae	Variovorax		Root473
Durán 2018	1	121	Bacteria	148	Proteobacteria	Betaproteobacteria	Burkholderiales	Comamonadaceae	Variovorax		Root318D1
Durán 2018	1	122	Bacteria	148	Proteobacteria	Betaproteobacteria	Burkholderiales	Oxalobacteraceae	Duganella		Root336D2
Durán 2018	1	123	Bacteria	148	Proteobacteria	Betaproteobacteria	Burkholderiales	Oxalobacteraceae	Massilia		Root335
Durán 2018	1	124	Bacteria	148	Proteobacteria	Betaproteobacteria	Burkholderiales	Oxalobacteraceae	Massilia		Root1438
Durán 2018	1	125	Bacteria	148	Proteobacteria	Betaproteobacteria	Burkholderiales	Oxalobacteraceae	Massilia		Root1485
Durán 2018	1	126	Bacteria	148	Proteobacteria	Gammaproteobacteria	Pseudomonadales	Pseudomonadaceae	Pseudomonas		Root9
Durán 2018	1	127	Bacteria	148	Proteobacteria	Gammaproteobacteria	Pseudomonadales	Pseudomonadaceae	Pseudomonas		Root68
Durán 2018	1	128	Bacteria	148	Proteobacteria	Gammaproteobacteria	Pseudomonadales	Pseudomonadaceae	Pseudomonas		Root71
Durán 2018	1	129	Bacteria	148	Proteobacteria	Gammaproteobacteria	Pseudomonadales	Pseudomonadaceae	Pseudomonas		Root329
Durán 2018	1	130	Bacteria	148	Proteobacteria	Gammaproteobacteria	Pseudomonadales	Pseudomonadaceae	Pseudomonas		Root401
Durán 2018	1	131	Bacteria	148	Proteobacteria	Gammaproteobacteria	Pseudomonadales	Pseudomonadaceae	Pseudomonas		Root562
Durán 2018	1	132	Bacteria	148	Proteobacteria	Gammaproteobacteria	Pseudomonadales	Pseudomonadaceae	Pseudomonas		Root569
Durán 2018	1	133	Bacteria	148	Proteobacteria	Gammaproteobacteria	Pseudomonadales	Pseudomonadaceae	Rhizobacter		Root29
Durán 2018	1	134	Bacteria	148	Proteobacteria	Gammaproteobacteria	Pseudomonadales	Pseudomonadaceae	Rhizobacter		Root404
Durán 2018	1	135	Bacteria	148	Proteobacteria	Gammaproteobacteria	Pseudomonadales	Pseudomonadaceae	Rhizobacter		Root1221
Durán 2018	1	136	Bacteria	148	Proteobacteria	Gammaproteobacteria	Pseudomonadales	Pseudomonadaceae	Rhizobacter		Root16D2
Durán 2018	1	137	Bacteria	148	Proteobacteria	Gammaproteobacteria	Xanthomonadales	Xanthomonadaceae	Lysobacter		Root76
Durán 2018	1	138	Bacteria	148	Proteobacteria	Gammaproteobacteria	Xanthomonadales	Xanthomonadaceae	Lysobacter		Root559
Durán 2018	1	139	Bacteria	148	Proteobacteria	Gammaproteobacteria	Xanthomonadales	Xanthomonadaceae	Lysobacter		Root604
Durán 2018	1	140	Bacteria	148	Proteobacteria	Gammaproteobacteria	Xanthomonadales	Xanthomonadaceae	Lysobacter		Root666
Durán 2018	1	141	Bacteria	148	Proteobacteria	Gammaproteobacteria	Xanthomonadales	Xanthomonadaceae	Lysobacter		Root667
Durán 2018	1	142	Bacteria	148	Proteobacteria	Gammaproteobacteria	Xanthomonadales	Xanthomonadaceae	Lysobacter		Root690
Durán 2018	1	143	Bacteria	148	Proteobacteria	Gammaproteobacteria	Xanthomonadales	Xanthomonadaceae	Lysobacter		Root916
Durán 2018	1	144	Bacteria	148	Proteobacteria	Gammaproteobacteria	Xanthomonadales	Xanthomonadaceae	Lysobacter		Root983
Durán 2018	1	145	Bacteria	148	Proteobacteria	Gammaproteobacteria	Xanthomonadales	Xanthomonadaceae	Pseudoxanthomonas		Root630
Durán 2018	1	146	Bacteria	148	Proteobacteria	Gammaproteobacteria	Xanthomonadales	Xanthomonadaceae	Rhodanobacter		Root627
Durán 2018	1	147	Bacteria	148	Proteobacteria	Gammaproteobacteria	Xanthomonadales	Xanthomonadaceae	Rhodanobacter		Soil772
Durán 2018	1	148	Bacteria	148	Proteobacteria	Gammaproteobacteria	Xanthomonadales	Xanthomonadaceae	Rhodanobacter		Soil773
Finkel 2019	1	1	Bacteria	183	Actinobacteria	Actinobacteria	Actinomycetales	Intrasporangiaceae	Terracoccus		MF273
Finkel 2019	1	2	Bacteria	183	Actinobacteria	Actinobacteria	Actinomycetales	Microbacteriaceae	Cryocola		MF340
Finkel 2019	1	3	Bacteria	183	Actinobacteria	Actinobacteria	Actinomycetales	Microbacteriaceae	Curtobacterium		CL17
Finkel 2019	1	4	Bacteria	183	Actinobacteria	Actinobacteria	Actinomycetales	Microbacteriaceae	Curtobacterium		CL20
Finkel 2019	1	5	Bacteria	183	Actinobacteria	Actinobacteria	Actinomycetales	Microbacteriaceae	Curtobacterium		MF314
Finkel 2019	1	6	Bacteria	183	Actinobacteria	Actinobacteria	Actinomycetales	Microbacteriaceae	Leifsonia		CL147
Finkel 2019	1	7	Bacteria	183	Actinobacteria	Actinobacteria	Actinomycetales	Microbacteriaceae	Leifsonia		MF109
Finkel 2019	1	8	Bacteria	183	Actinobacteria	Actinobacteria	Actinomycetales	Microbacteriaceae	Leifsonia		MF115A
Finkel 2019	1	9	Bacteria	183	Actinobacteria	Actinobacteria	Actinomycetales	Microbacteriaceae	Leifsonia		MF157
Finkel 2019	1	10	Bacteria	183	Actinobacteria	Actinobacteria	Actinomycetales	Microbacteriaceae	Leifsonia		MF197A
Finkel 2019	1	11	Bacteria	183	Actinobacteria	Actinobacteria	Actinomycetales	Microbacteriaceae	Leifsonia		MF21
Finkel 2019	1	12	Bacteria	183	Actinobacteria	Actinobacteria	Actinomycetales	Microbacteriaceae	Leifsonia		MF466
Finkel 2019	1	13	Bacteria	183	Actinobacteria	Actinobacteria	Actinomycetales	Microbacteriaceae	Leifsonia		MF467
Finkel 2019	1	14	Bacteria	183	Actinobacteria	Actinobacteria	Actinomycetales	Microbacteriaceae	Leifsonia		MF509
Finkel 2019	1	15	Bacteria	183	Actinobacteria	Actinobacteria	Actinomycetales	Microbacteriaceae	Leifsonia		MF98A
Finkel 2019	1	16	Bacteria	183	Actinobacteria	Actinobacteria	Actinomycetales	Microbacteriaceae	Microbacterium	azadirachtae	CL89
Finkel 2019	1	17	Bacteria	183	Actinobacteria	Actinobacteria	Actinomycetales	Microbacteriaceae	Microbacterium	mucogenicum	MF261
Finkel 2019	1	18	Bacteria	183	Actinobacteria	Actinobacteria	Actinomycetales	Microbacteriaceae	Microbacterium		CL10 (UNCCL10)
Finkel 2019	1	19	Bacteria	183	Actinobacteria	Actinobacteria	Actinomycetales	Microbacteriaceae	Microbacterium		CL127
Finkel 2019	1	20	Bacteria	183	Actinobacteria	Actinobacteria	Actinomycetales	Microbacteriaceae	Microbacterium		CL12A
Finkel 2019	1	21	Bacteria	183	Actinobacteria	Actinobacteria	Actinomycetales	Microbacteriaceae	Microbacterium		CL140
Finkel 2019	1	22	Bacteria	183	Actinobacteria	Actinobacteria	Actinomycetales	Microbacteriaceae	Microbacterium		CL152
Finkel 2019	1	23	Bacteria	183	Actinobacteria	Actinobacteria	Actinomycetales	Microbacteriaceae	Microbacterium		MF11
Finkel 2019	1	24	Bacteria	183	Actinobacteria	Actinobacteria	Actinomycetales	Microbacteriaceae	Microbacterium		MF292
Finkel 2019	1	25	Bacteria	183	Actinobacteria	Actinobacteria	Actinomycetales	Microbacteriaceae	Microbacterium		MF77
Finkel 2019	1	26	Bacteria	183	Actinobacteria	Actinobacteria	Actinomycetales	Micrococcaceae	Arthrobacter	nicotinovorans	MF231
Finkel 2019	1	27	Bacteria	183	Actinobacteria	Actinobacteria	Actinomycetales	Micrococcaceae	Arthrobacter	nicotinovorans	MF254
Finkel 2019	1	28	Bacteria	183	Actinobacteria	Actinobacteria	Actinomycetales	Micrococcaceae	Arthrobacter	nicotinovorans	MF26
Finkel 2019	1	29	Bacteria	183	Actinobacteria	Actinobacteria	Actinomycetales	Micrococcaceae	Arthrobacter		CL28
Finkel 2019	1	30	Bacteria	183	Actinobacteria	Actinobacteria	Actinomycetales	Micrococcaceae	Arthrobacter		CL63
Finkel 2019	1	31	Bacteria	183	Actinobacteria	Actinobacteria	Actinomycetales	Micrococcaceae	Arthrobacter		MF131
Finkel 2019	1	32	Bacteria	183	Actinobacteria	Actinobacteria	Actinomycetales	Micrococcaceae	Arthrobacter		MF135
Finkel 2019	1	33	Bacteria	183	Actinobacteria	Actinobacteria	Actinomycetales	Micrococcaceae	Arthrobacter		MF161
Finkel 2019	1	34	Bacteria	183	Actinobacteria	Actinobacteria	Actinomycetales	Micrococcaceae	Arthrobacter		MF162
Finkel 2019	1	35	Bacteria	183	Actinobacteria	Actinobacteria	Actinomycetales	Micrococcaceae	Arthrobacter		MF31
Finkel 2019	1	36	Bacteria	183	Actinobacteria	Actinobacteria	Actinomycetales	Micrococcaceae	Arthrobacter		MF362
Finkel 2019	1	37	Bacteria	183	Actinobacteria	Actinobacteria	Actinomycetales	Micrococcaceae	Arthrobacter		MF49
Finkel 2019	1	38	Bacteria	183	Actinobacteria	Actinobacteria	Actinomycetales	Micrococcaceae	Arthrobacter		MF9
Finkel 2019	1	39	Bacteria	183	Actinobacteria	Actinobacteria	Actinomycetales	Mycobacteriaceae	Mycobacterium		CL9
Finkel 2019	1	40	Bacteria	183	Actinobacteria	Actinobacteria	Actinomycetales	Mycobacteriaceae	Mycobacterium		MF267
Finkel 2019	1	41	Bacteria	183	Actinobacteria	Actinobacteria	Actinomycetales	Mycobacteriaceae	Mycobacterium		MF280
Finkel 2019	1	42	Bacteria	183	Actinobacteria	Actinobacteria	Actinomycetales	Mycobacteriaceae	Mycobacterium		MF283
Finkel 2019	1	43	Bacteria	183	Actinobacteria	Actinobacteria	Actinomycetales	Mycobacteriaceae	Mycobacterium		MF360
Finkel 2019	1	44	Bacteria	183	Actinobacteria	Actinobacteria	Actinomycetales	Mycobacteriaceae	Mycobacterium		MF365
Finkel 2019	1	45	Bacteria	183	Actinobacteria	Actinobacteria	Actinomycetales	Mycobacteriaceae	Mycobacterium		MF501A
Finkel 2019	1	46	Bacteria	183	Actinobacteria	Actinobacteria	Actinomycetales	Mycobacteriaceae	Mycobacterium		MF88
Finkel 2019	1	47	Bacteria	183	Actinobacteria	Actinobacteria	Actinomycetales	Nocardiaceae	Nocardia		MF348
Finkel 2019	1	48	Bacteria	183	Actinobacteria	Actinobacteria	Actinomycetales	Nocardiaceae	Nocardioides		MF345
Finkel 2019	1	49	Bacteria	183	Actinobacteria	Actinobacteria	Actinomycetales	Nocardiaceae	Rhodococcus	erythropolis	MF339
Finkel 2019	1	50	Bacteria	183	Actinobacteria	Actinobacteria	Actinomycetales	Nocardiaceae	Rhodococcus	maanshanensis	MF259
Finkel 2019	1	51	Bacteria	183	Actinobacteria	Actinobacteria	Actinomycetales	Nocardiaceae	Rhodococcus		MF114
Finkel 2019	1	52	Bacteria	183	Actinobacteria	Actinobacteria	Actinomycetales	Nocardiaceae	Rhodococcus		MF164
Finkel 2019	1	53	Bacteria	183	Actinobacteria	Actinobacteria	Actinomycetales	Nocardiaceae	Rhodococcus		MF23
Finkel 2019	1	54	Bacteria	183	Actinobacteria	Actinobacteria	Actinomycetales	Nocardiaceae	Rhodococcus		MF29
Finkel 2019	1	55	Bacteria	183	Actinobacteria	Actinobacteria	Actinomycetales	Nocardiaceae	Rhodococcus		MF363
Finkel 2019	1	56	Bacteria	183	Actinobacteria	Actinobacteria	Actinomycetales	Promicromonosporaceae	Promicromonospora	sukumoe	MF327
Finkel 2019	1	57	Bacteria	183	Actinobacteria	Actinobacteria	Actinomycetales	Streptomycetaceae	Streptomyces	canus	MF299
Finkel 2019	1	58	Bacteria	183	Actinobacteria	Actinobacteria	Actinomycetales	Streptomycetaceae	Streptomyces		CL18
Finkel 2019	1	59	Bacteria	183	Actinobacteria	Actinobacteria	Actinomycetales	Streptomycetaceae	Streptomyces		MF136
Finkel 2019	1	60	Bacteria	183	Actinobacteria	Actinobacteria	Actinomycetales	Streptomycetaceae	Streptomyces		MF140
Finkel 2019	1	61	Bacteria	183	Actinobacteria	Actinobacteria	Actinomycetales	Streptomycetaceae	Streptomyces		MF303
Finkel 2019	1	62	Bacteria	183	Actinobacteria	Actinobacteria	Actinomycetales	Streptomycetaceae	Streptomyces		MF351
Finkel 2019	1	63	Bacteria	183	Actinobacteria	Actinobacteria	Corynebacteriales	Mycobacteriaceae	Mycobacterium		MF455
Finkel 2019	1	64	Bacteria	183	Bacteroidetes	Flavobacteriia	Flavobacteriales	Flavobacteriaceae	Chryseobacterium		MF312A
Finkel 2019	1	65	Bacteria	183	Bacteroidetes	Flavobacteriia	Flavobacteriales	Flavobacteriaceae	Chryseobacterium		MF8
Finkel 2019	1	66	Bacteria	183	Bacteroidetes	Flavobacteriia	Flavobacteriales	Flavobacteriaceae	Flavobacterium		MF40
Finkel 2019	1	67	Bacteria	183	Bacteroidetes	Flavobacteriia	Flavobacteriales	Flavobacteriaceae	Hymenobacter		MF380
Finkel 2019	1	68	Bacteria	183	Firmicutes	Bacilli	Bacillales	Bacillaceae	Bacillus	flexus	MF27
Finkel 2019	1	69	Bacteria	183	Firmicutes	Bacilli	Bacillales	Bacillaceae	Bacillus		CL115
Finkel 2019	1	70	Bacteria	183	Firmicutes	Bacilli	Bacillales	Bacillaceae	Bacillus		CL13
Finkel 2019	1	71	Bacteria	183	Firmicutes	Bacilli	Bacillales	Bacillaceae	Bacillus		CL25
Finkel 2019	1	72	Bacteria	183	Firmicutes	Bacilli	Bacillales	Bacillaceae	Bacillus		CL72
Finkel 2019	1	73	Bacteria	183	Firmicutes	Bacilli	Bacillales	Bacillaceae	Bacillus		CL73
Finkel 2019	1	74	Bacteria	183	Firmicutes	Bacilli	Bacillales	Bacillaceae	Bacillus		CL81
Finkel 2019	1	75	Bacteria	183	Firmicutes	Bacilli	Bacillales	Bacillaceae	Bacillus		CL96
Finkel 2019	1	76	Bacteria	183	Firmicutes	Bacilli	Bacillales	Bacillaceae	Bacillus		MF103
Finkel 2019	1	77	Bacteria	183	Firmicutes	Bacilli	Bacillales	Bacillaceae	Bacillus		MF105
Finkel 2019	1	78	Bacteria	183	Firmicutes	Bacilli	Bacillales	Bacillaceae	Bacillus		MF106
Finkel 2019	1	79	Bacteria	183	Firmicutes	Bacilli	Bacillales	Bacillaceae	Bacillus		MF107
Finkel 2019	1	80	Bacteria	183	Firmicutes	Bacilli	Bacillales	Bacillaceae	Bacillus		MF112
Finkel 2019	1	81	Bacteria	183	Firmicutes	Bacilli	Bacillales	Bacillaceae	Bacillus		MF123
Finkel 2019	1	82	Bacteria	183	Firmicutes	Bacilli	Bacillales	Bacillaceae	Bacillus		MF125
Finkel 2019	1	83	Bacteria	183	Firmicutes	Bacilli	Bacillales	Bacillaceae	Bacillus		MF166A
Finkel 2019	1	84	Bacteria	183	Firmicutes	Bacilli	Bacillales	Bacillaceae	Bacillus		MF196
Finkel 2019	1	85	Bacteria	183	Firmicutes	Bacilli	Bacillales	Bacillaceae	Bacillus		MF212
Finkel 2019	1	86	Bacteria	183	Firmicutes	Bacilli	Bacillales	Bacillaceae	Bacillus		MF215
Finkel 2019	1	87	Bacteria	183	Firmicutes	Bacilli	Bacillales	Bacillaceae	Bacillus		MF322
Finkel 2019	1	88	Bacteria	183	Firmicutes	Bacilli	Bacillales	Bacillaceae	Bacillus		MF41
Finkel 2019	1	89	Bacteria	183	Firmicutes	Bacilli	Bacillales	Bacillaceae	Bacillus		MF491
Finkel 2019	1	90	Bacteria	183	Firmicutes	Bacilli	Bacillales	Bacillaceae	Bacillus		MF5
Finkel 2019	1	91	Bacteria	183	Firmicutes	Bacilli	Bacillales	Bacillaceae	Bacillus		MF69
Finkel 2019	1	92	Bacteria	183	Firmicutes	Bacilli	Bacillales	Bacillaceae	Bacillus		MF95
Finkel 2019	1	93	Bacteria	183	Firmicutes	Bacilli	Bacillales	Paenibacillaceae	Paenibacillus		CL117
Finkel 2019	1	94	Bacteria	183	Firmicutes	Bacilli	Bacillales	Paenibacillaceae	Paenibacillus		CL123
Finkel 2019	1	95	Bacteria	183	Firmicutes	Bacilli	Bacillales	Paenibacillaceae	Paenibacillus		CL130
Finkel 2019	1	96	Bacteria	183	Firmicutes	Bacilli	Bacillales	Paenibacillaceae	Paenibacillus		CL141A
Finkel 2019	1	97	Bacteria	183	Firmicutes	Bacilli	Bacillales	Paenibacillaceae	Paenibacillus		CL52
Finkel 2019	1	98	Bacteria	183	Firmicutes	Bacilli	Bacillales	Paenibacillaceae	Paenibacillus		CL91
Finkel 2019	1	99	Bacteria	183	Firmicutes	Bacilli	Bacillales	Paenibacillaceae	Paenibacillus		MF181
Finkel 2019	1	100	Bacteria	183	Firmicutes	Bacilli	Bacillales	Paenibacillaceae	Paenibacillus		MF217
Finkel 2019	1	101	Bacteria	183	Firmicutes	Bacilli	Bacillales	Paenibacillaceae	Paenibacillus		MF445
Finkel 2019	1	102	Bacteria	183	Firmicutes	Bacilli	Bacillales	Paenibacillaceae	Paenibacillus		MF451
Finkel 2019	1	103	Bacteria	183	Firmicutes	Bacilli	Bacillales	Paenibacillaceae	Paenibacillus		MF453
Finkel 2019	1	104	Bacteria	183	Firmicutes	Bacilli	Bacillales	Paenibacillaceae	Paenibacillus		MF496
Finkel 2019	1	105	Bacteria	183	Firmicutes	Bacilli	Bacillales	Paenibacillaceae	Paenibacillus		MF499
Finkel 2019	1	106	Bacteria	183	Proteobacteria	Alphaproteobacteria	Caulobacterales	Caulobacteraceae	Brevundimonas		CL4
Finkel 2019	1	107	Bacteria	183	Proteobacteria	Alphaproteobacteria	Caulobacterales	Caulobacteraceae	Brevundimonas		MF374
Finkel 2019	1	108	Bacteria	183	Proteobacteria	Alphaproteobacteria	Caulobacterales	Caulobacteraceae	Caulobacter		MF279
Finkel 2019	1	109	Bacteria	183	Proteobacteria	Alphaproteobacteria	Rhizobiales	Bradyrhizobiaceae	Bosea		CL19
Finkel 2019	1	110	Bacteria	183	Proteobacteria	Alphaproteobacteria	Rhizobiales	Brucellaceae	Ochrobactrum		CL2
Finkel 2019	1	111	Bacteria	183	Proteobacteria	Alphaproteobacteria	Rhizobiales	Brucellaceae	Ochrobactrum		MF370
Finkel 2019	1	112	Bacteria	183	Proteobacteria	Alphaproteobacteria	Rhizobiales	Methylobacteriaceae	Methylobacterium		CL125
Finkel 2019	1	113	Bacteria	183	Proteobacteria	Alphaproteobacteria	Rhizobiales	Methylobacteriaceae	Methylobacterium		CL126
Finkel 2019	1	114	Bacteria	183	Proteobacteria	Alphaproteobacteria	Rhizobiales	Methylobacteriaceae	Methylobacterium		CL129
Finkel 2019	1	115	Bacteria	183	Proteobacteria	Alphaproteobacteria	Rhizobiales	Methylobacteriaceae	Methylobacterium		CL136
Finkel 2019	1	116	Bacteria	183	Proteobacteria	Alphaproteobacteria	Rhizobiales	Methylobacteriaceae	Methylobacterium		CL143
Finkel 2019	1	117	Bacteria	183	Proteobacteria	Alphaproteobacteria	Rhizobiales	Methylobacteriaceae	Methylobacterium		MF174
Finkel 2019	1	118	Bacteria	183	Proteobacteria	Alphaproteobacteria	Rhizobiales	Methylobacteriaceae	Methylobacterium		MF190
Finkel 2019	1	119	Bacteria	183	Proteobacteria	Alphaproteobacteria	Rhizobiales	Methylobacteriaceae	Methylobacterium		MF275
Finkel 2019	1	120	Bacteria	183	Proteobacteria	Alphaproteobacteria	Rhizobiales	Methylobacteriaceae	Methylobacterium		MF300
Finkel 2019	1	121	Bacteria	183	Proteobacteria	Alphaproteobacteria	Rhizobiales	Methylobacteriaceae	Methylobacterium		MF378
Finkel 2019	1	122	Bacteria	183	Proteobacteria	Alphaproteobacteria	Rhizobiales	Phyllobacteriaceae	Phyllobacterium		CL33
Finkel 2019	1	123	Bacteria	183	Proteobacteria	Alphaproteobacteria	Rhizobiales	Phyllobacteriaceae	Phyllobacterium		MF177
Finkel 2019	1	124	Bacteria	183	Proteobacteria	Alphaproteobacteria	Rhizobiales	Phyllobacteriaceae	Phyllobacterium		MF302
Finkel 2019	1	125	Bacteria	183	Proteobacteria	Alphaproteobacteria	Rhizobiales	Rhizobiaceae	Agrobacterium	tumefaciens	CL32
Finkel 2019	1	126	Bacteria	183	Proteobacteria	Alphaproteobacteria	Rhizobiales	Rhizobiaceae	Agrobacterium		CL41
Finkel 2019	1	127	Bacteria	183	Proteobacteria	Alphaproteobacteria	Rhizobiales	Rhizobiaceae	Agrobacterium		MF10
Finkel 2019	1	128	Bacteria	183	Proteobacteria	Alphaproteobacteria	Rhizobiales	Rhizobiaceae	Agrobacterium		MF224
Finkel 2019	1	129	Bacteria	183	Proteobacteria	Alphaproteobacteria	Rhizobiales	Rhizobiaceae	Agrobacterium		MF33
Finkel 2019	1	130	Bacteria	183	Proteobacteria	Alphaproteobacteria	Rhizobiales	Rhizobiaceae	Agrobacterium		MF389
Finkel 2019	1	131	Bacteria	183	Proteobacteria	Alphaproteobacteria	Rhizobiales	Rhizobiaceae	Rhizobium		MF2
Finkel 2019	1	132	Bacteria	183	Proteobacteria	Alphaproteobacteria	Rhizobiales	Rhizobiaceae	Rhizobium		MF28
Finkel 2019	1	133	Bacteria	183	Proteobacteria	Alphaproteobacteria	Rhizobiales	Rhizobiaceae	Rhizobium		MF42
Finkel 2019	1	134	Bacteria	183	Proteobacteria	Alphaproteobacteria	Rhizobiales	Rhizobiaceae	Rhizobium		MF57
Finkel 2019	1	135	Bacteria	183	Proteobacteria	Alphaproteobacteria	Rhizobiales	Rhizobiaceae	Rhizobium		MF72 (IBUN)
Finkel 2019	1	136	Bacteria	183	Proteobacteria	Alphaproteobacteria	Sphingomonadales	Sphingomonadaceae	Sphingomonas		MF220A
Finkel 2019	1	137	Bacteria	183	Proteobacteria	Alphaproteobacteria	Sphingomonadales	Sphingomonadaceae	Sphingomonas		MF305
Finkel 2019	1	138	Bacteria	183	Proteobacteria	Betaproteobacteria	Burkholderiales	Burkholderiaceae	Burkholderia	bryophila	MF376
Finkel 2019	1	139	Bacteria	183	Proteobacteria	Betaproteobacteria	Burkholderiales	Burkholderiaceae	Burkholderia	cenocepacia	MF6
Finkel 2019	1	140	Bacteria	183	Proteobacteria	Betaproteobacteria	Burkholderiales	Burkholderiaceae	Burkholderia	cenocepacia	MF7
Finkel 2019	1	141	Bacteria	183	Proteobacteria	Betaproteobacteria	Burkholderiales	Burkholderiaceae	Burkholderia		CL11
Finkel 2019	1	142	Bacteria	183	Proteobacteria	Betaproteobacteria	Burkholderiales	Burkholderiaceae	Burkholderia		MF384
Finkel 2019	1	143	Bacteria	183	Proteobacteria	Betaproteobacteria	Burkholderiales	Comamonadaceae	Variovorax	paradoxus	CL14
Finkel 2019	1	144	Bacteria	183	Proteobacteria	Betaproteobacteria	Burkholderiales	Comamonadaceae	Variovorax	paradoxus	MF110
Finkel 2019	1	145	Bacteria	183	Proteobacteria	Betaproteobacteria	Burkholderiales	Comamonadaceae	Variovorax	paradoxus	MF295
Finkel 2019	1	146	Bacteria	183	Proteobacteria	Betaproteobacteria	Burkholderiales	Comamonadaceae	Variovorax	paradoxus	MF349
Finkel 2019	1	147	Bacteria	183	Proteobacteria	Betaproteobacteria	Burkholderiales	Comamonadaceae	Variovorax	paradoxus	MF369
Finkel 2019	1	148	Bacteria	183	Proteobacteria	Betaproteobacteria	Burkholderiales	Comamonadaceae	Variovorax	paradoxus	MF4
Finkel 2019	1	149	Bacteria	183	Proteobacteria	Betaproteobacteria	Burkholderiales	Comamonadaceae	Variovorax		MF160
Finkel 2019	1	150	Bacteria	183	Proteobacteria	Betaproteobacteria	Burkholderiales	Comamonadaceae	Variovorax		MF278
Finkel 2019	1	151	Bacteria	183	Proteobacteria	Betaproteobacteria	Burkholderiales	Comamonadaceae	Variovorax		MF350
Finkel 2019	1	152	Bacteria	183	Proteobacteria	Betaproteobacteria	Burkholderiales	Comamonadaceae	Variovorax		MF375
Finkel 2019	1	153	Bacteria	183	Proteobacteria	Betaproteobacteria	Burkholderiales	Ralstoniaceae	Ralstonia		CL144
Finkel 2019	1	154	Bacteria	183	Proteobacteria	Betaproteobacteria	Burkholderiales	Ralstoniaceae	Ralstonia		CL21
Finkel 2019	1	155	Bacteria	183	Proteobacteria	Gammaproteobacteria	Pseudomonadales	Moraxellaceae	Acinetobacter		CL69
Finkel 2019	1	156	Bacteria	183	Proteobacteria	Gammaproteobacteria	Pseudomonadales	Moraxellaceae	Acinetobacter		CL71
Finkel 2019	1	157	Bacteria	183	Proteobacteria	Gammaproteobacteria	Pseudomonadales	Pseudomonadaceae	Pseudomonas	brassicacearum	MF51
Finkel 2019	1	158	Bacteria	183	Proteobacteria	Gammaproteobacteria	Pseudomonadales	Pseudomonadaceae	Pseudomonas	mandelii	MF36
Finkel 2019	1	159	Bacteria	183	Proteobacteria	Gammaproteobacteria	Pseudomonadales	Pseudomonadaceae	Pseudomonas	umsongensis	CL58
Finkel 2019	1	160	Bacteria	183	Proteobacteria	Gammaproteobacteria	Pseudomonadales	Pseudomonadaceae	Pseudomonas	umsongensis	MF20
Finkel 2019	1	161	Bacteria	183	Proteobacteria	Gammaproteobacteria	Pseudomonadales	Pseudomonadaceae	Pseudomonas		MF113
Finkel 2019	1	162	Bacteria	183	Proteobacteria	Gammaproteobacteria	Pseudomonadales	Pseudomonadaceae	Pseudomonas		MF3
Finkel 2019	1	163	Bacteria	183	Proteobacteria	Gammaproteobacteria	Pseudomonadales	Pseudomonadaceae	Pseudomonas		MF35
Finkel 2019	1	164	Bacteria	183	Proteobacteria	Gammaproteobacteria	Pseudomonadales	Pseudomonadaceae	Pseudomonas		MF397
Finkel 2019	1	165	Bacteria	183	Proteobacteria	Gammaproteobacteria	Pseudomonadales	Pseudomonadaceae	Pseudomonas		MF45
Finkel 2019	1	166	Bacteria	183	Proteobacteria	Gammaproteobacteria	Pseudomonadales	Pseudomonadaceae	Pseudomonas		MF48
Finkel 2019	1	167	Bacteria	183	Proteobacteria	Gammaproteobacteria	Pseudomonadales	Pseudomonadaceae	Pseudomonas		MF50
Finkel 2019	1	168	Bacteria	183	Proteobacteria	Gammaproteobacteria	Xanthomonadales	Rhodanobacteraceae	Dyella	japonica	MF79
Finkel 2019	1	169	Bacteria	183	Proteobacteria	Gammaproteobacteria	Xanthomonadales	Rhodanobacteraceae	Dyella	marensis	MF178
Finkel 2019	1	170	Bacteria	183	Proteobacteria	Gammaproteobacteria	Xanthomonadales	Rhodanobacteraceae	Dyella		MF333
Finkel 2019	1	171	Bacteria	183	Proteobacteria	Gammaproteobacteria	Xanthomonadales	Rhodanobacteraceae	Luteibacter		MF138
Finkel 2019	1	172	Bacteria	183	Proteobacteria	Gammaproteobacteria	Xanthomonadales	Rhodanobacteraceae	Luteibacter		MF22
Finkel 2019	1	173	Bacteria	183	Proteobacteria	Gammaproteobacteria	Xanthomonadales	Rhodanobacteraceae	Luteibacter		MF329
Finkel 2019	1	174	Bacteria	183	Proteobacteria	Gammaproteobacteria	Xanthomonadales	Rhodanobacteraceae	Luteibacter		MF331
Finkel 2019	1	175	Bacteria	183	Proteobacteria	Gammaproteobacteria	Xanthomonadales	Rhodanobacteraceae	Luteibacter		MF366
Finkel 2019	1	176	Bacteria	183	Proteobacteria	Gammaproteobacteria	Xanthomonadales	Xanthomonadaceae	Stenotrophomonas		MF92
Finkel 2019	1	177	Bacteria	183	unclassified	unclassified	unclassified	unclassified	unclassified		CL116
Finkel 2019	1	178	Bacteria	183	unclassified	unclassified	unclassified	unclassified	unclassified		CL68
Finkel 2019	1	179	Bacteria	183	unclassified	unclassified	unclassified	unclassified	unclassified		MF137
Finkel 2019	1	180	Bacteria	183	unclassified	unclassified	unclassified	unclassified	unclassified		MF143
Finkel 2019	1	181	Bacteria	183	unclassified	unclassified	unclassified	unclassified	unclassified		MF17
Finkel 2019	1	182	Bacteria	183	unclassified	unclassified	unclassified	unclassified	unclassified		MF323
Finkel 2019	1	183	Bacteria	183	unclassified	unclassified	unclassified	unclassified	unclassified		MF332
Finkel 2020	1		Idem Finkel 2019 (185 member)	185
Ramírez-Villacis 2020	1		idem Finkel 2019 (185 member)	185
Bai 2015	1	1	Bacteria	188	Actinobacteria	Actinobacteria	Actinomycetales	Cellulomonadaceae	Cellulomonas
Bai 2015	1	2	Bacteria	188	Actinobacteria	Actinobacteria	Actinomycetales	Cellulomonadaceae	Cellulomonas
Bai 2015	1	3	Bacteria	188	Actinobacteria	Actinobacteria	Actinomycetales	Cellulomonadaceae	Cellulomonas
Bai 2015	1	4	Bacteria	188	Actinobacteria	Actinobacteria	Actinomycetales	Cellulomonadaceae	Oerskovia
Bai 2015	1	5	Bacteria	188	Actinobacteria	Actinobacteria	Actinomycetales	Microbacteriaceae	Agromyces
Bai 2015	1	6	Bacteria	188	Actinobacteria	Actinobacteria	Actinomycetales	Microbacteriaceae	Agromyces
Bai 2015	1	7	Bacteria	188	Actinobacteria	Actinobacteria	Actinomycetales	Microbacteriaceae	Leifsonia
Bai 2015	1	8	Bacteria	188	Actinobacteria	Actinobacteria	Actinomycetales	Microbacteriaceae	Leifsonia
Bai 2015	1	9	Bacteria	188	Actinobacteria	Actinobacteria	Actinomycetales	Microbacteriaceae	Leifsonia
Bai 2015	1	10	Bacteria	188	Actinobacteria	Actinobacteria	Actinomycetales	Microbacteriaceae	Leifsonia
Bai 2015	1	11	Bacteria	188	Actinobacteria	Actinobacteria	Actinomycetales	Microbacteriaceae	Microbacterium
Bai 2015	1	12	Bacteria	188	Actinobacteria	Actinobacteria	Actinomycetales	Microbacteriaceae	Microbacterium
Bai 2015	1	13	Bacteria	188	Actinobacteria	Actinobacteria	Actinomycetales	Microbacteriaceae	Microbacterium
Bai 2015	1	14	Bacteria	188	Actinobacteria	Actinobacteria	Actinomycetales	Microbacteriaceae	Microbacterium
Bai 2015	1	15	Bacteria	188	Actinobacteria	Actinobacteria	Actinomycetales	Microbacteriaceae	Microbacterium
Bai 2015	1	16	Bacteria	188	Actinobacteria	Actinobacteria	Actinomycetales	Microbacteriaceae	Microbacterium
Bai 2015	1	17	Bacteria	188	Actinobacteria	Actinobacteria	Actinomycetales	Microbacteriaceae	Microbacterium
Bai 2015	1	18	Bacteria	188	Actinobacteria	Actinobacteria	Actinomycetales	Microbacteriaceae	Yonghaparkia
Bai 2015	1	19	Bacteria	188	Actinobacteria	Actinobacteria	Actinomycetales	Microbacteriaceae	Yonghaparkia
Bai 2015	1	20	Bacteria	188	Actinobacteria	Actinobacteria	Actinomycetales	Micrococcaceae	Arthrobacter
Bai 2015	1	21	Bacteria	188	Actinobacteria	Actinobacteria	Actinomycetales	Micrococcaceae	Arthrobacter
Bai 2015	1	22	Bacteria	188	Actinobacteria	Actinobacteria	Actinomycetales	Micrococcaceae	Arthrobacter
Bai 2015	1	23	Bacteria	188	Actinobacteria	Actinobacteria	Actinomycetales	Micrococcaceae	Arthrobacter
Bai 2015	1	24	Bacteria	188	Actinobacteria	Actinobacteria	Actinomycetales	Micrococcaceae	Arthrobacter
Bai 2015	1	25	Bacteria	188	Actinobacteria	Actinobacteria	Actinomycetales	Micrococcaceae	Arthrobacter
Bai 2015	1	26	Bacteria	188	Actinobacteria	Actinobacteria	Actinomycetales	Micrococcaceae	Arthrobacter
Bai 2015	1	27	Bacteria	188	Actinobacteria	Actinobacteria	Actinomycetales	Mycobacteriaceae	Mycobacterium
Bai 2015	1	28	Bacteria	188	Actinobacteria	Actinobacteria	Actinomycetales	Mycobacteriaceae	Mycobacterium
Bai 2015	1	29	Bacteria	188	Actinobacteria	Actinobacteria	Actinomycetales	Mycobacteriaceae	Mycobacterium
Bai 2015	1	30	Bacteria	188	Actinobacteria	Actinobacteria	Actinomycetales	Mycobacteriaceae	Mycobacterium
Bai 2015	1	31	Bacteria	188	Actinobacteria	Actinobacteria	Actinomycetales	Nocardiaceae	Nocardia
Bai 2015	1	32	Bacteria	188	Actinobacteria	Actinobacteria	Actinomycetales	Nocardioidaceae	Aeromicrobium
Bai 2015	1	33	Bacteria	188	Actinobacteria	Actinobacteria	Actinomycetales	Nocardioidaceae	Aeromicrobium
Bai 2015	1	34	Bacteria	188	Actinobacteria	Actinobacteria	Actinomycetales	Nocardioidaceae	Aeromicrobium
Bai 2015	1	35	Bacteria	188	Actinobacteria	Actinobacteria	Actinomycetales	Nocardioidaceae	Aeromicrobium
Bai 2015	1	36	Bacteria	188	Actinobacteria	Actinobacteria	Actinomycetales	Nocardioidaceae	Nocardioides
Bai 2015	1	37	Bacteria	188	Actinobacteria	Actinobacteria	Actinomycetales	Nocardioidaceae	Nocardioides
Bai 2015	1	38	Bacteria	188	Actinobacteria	Actinobacteria	Actinomycetales	Nocardioidaceae	Nocardioides
Bai 2015	1	39	Bacteria	188	Actinobacteria	Actinobacteria	Actinomycetales	Nocardioidaceae	Nocardioides
Bai 2015	1	40	Bacteria	188	Actinobacteria	Actinobacteria	Actinomycetales	Nocardioidaceae	Nocardioides
Bai 2015	1	41	Bacteria	188	Actinobacteria	Actinobacteria	Actinomycetales	Nocardioidaceae	Nocardioides
Bai 2015	1	42	Bacteria	188	Actinobacteria	Actinobacteria	Actinomycetales	Nocardioidaceae	Nocardioides
Bai 2015	1	43	Bacteria	188	Actinobacteria	Actinobacteria	Actinomycetales	Nocardioidaceae	Nocardioides
Bai 2015	1	44	Bacteria	188	Actinobacteria	Actinobacteria	Actinomycetales	Nocardioidaceae	Nocardioides
Bai 2015	1	45	Bacteria	188	Actinobacteria	Actinobacteria	Actinomycetales	Nocardioidaceae	Nocardioides
Bai 2015	1	46	Bacteria	188	Actinobacteria	Actinobacteria	Actinomycetales	Nocardioidaceae	Nocardioides
Bai 2015	1	47	Bacteria	188	Actinobacteria	Actinobacteria	Actinomycetales	Nocardioidaceae	Nocardioides
Bai 2015	1	48	Bacteria	188	Actinobacteria	Actinobacteria	Actinomycetales	Streptomycetaceae	Kitasatospora
Bai 2015	1	49	Bacteria	188	Actinobacteria	Actinobacteria	Actinomycetales	Streptomycetaceae	Kitasatospora
Bai 2015	1	50	Bacteria	188	Actinobacteria	Actinobacteria	Actinomycetales	Streptomycetaceae	Streptomyces
Bai 2015	1	51	Bacteria	188	Actinobacteria	Actinobacteria	Actinomycetales	Streptomycetaceae	Streptomyces
Bai 2015	1	52	Bacteria	188	Actinobacteria	Actinobacteria	Actinomycetales	Streptomycetaceae	Streptomyces
Bai 2015	1	53	Bacteria	188	Actinobacteria	Actinobacteria	Actinomycetales	Streptomycetaceae	Streptomyces
Bai 2015	1	54	Bacteria	188	Actinobacteria	Actinobacteria	Actinomycetales	Streptomycetaceae	Streptomyces
Bai 2015	1	55	Bacteria	188	Actinobacteria	Actinobacteria	Actinomycetales	Streptomycetaceae	Streptomyces
Bai 2015	1	56	Bacteria	188	Actinobacteria	Actinobacteria	Micrococcales	Intrasporangiaceae	Janibacter
Bai 2015	1	57	Bacteria	188	Actinobacteria	Actinobacteria	Micrococcales	Intrasporangiaceae	Knoellia
Bai 2015	1	58	Bacteria	188	Actinobacteria	Actinobacteria	Micrococcales	Intrasporangiaceae	Phycicoccus
Bai 2015	1	59	Bacteria	188	Actinobacteria	Actinobacteria	Micrococcales	Intrasporangiaceae	Phycicoccus
Bai 2015	1	60	Bacteria	188	Actinobacteria	Actinobacteria	Micrococcales	Intrasporangiaceae	Phycicoccus
Bai 2015	1	61	Bacteria	188	Actinobacteria	Actinobacteria	Micrococcales	Intrasporangiaceae	Phycicoccus
Bai 2015	1	62	Bacteria	188	Actinobacteria	Actinobacteria	Micrococcales	Intrasporangiaceae	Terrabacter
Bai 2015	1	63	Bacteria	188	Actinobacteria	Actinobacteria	Micrococcales	Intrasporangiaceae	Terrabacter
Bai 2015	1	64	Bacteria	188	Actinobacteria	Actinobacteria	Micrococcales	Intrasporangiaceae	Terrabacter
Bai 2015	1	65	Bacteria	188	Actinobacteria	Actinobacteria	Micrococcales	Intrasporangiaceae	Terrabacter
Bai 2015	1	66	Bacteria	188	Actinobacteria	Actinobacteria	Micrococcales	Intrasporangiaceae	Tetrasphaera
Bai 2015	1	67	Bacteria	188	Actinobacteria	Actinobacteria	Kineosporiales	Kineosporiaceae	Angustibacter
Bai 2015	1	68	Bacteria	188	Bacteroidetes	Flavobacteriia	Flavobacteriales	Flavobacteriaceae	Flavobacterium
Bai 2015	1	69	Bacteria	188	Bacteroidetes	Flavobacteriia	Flavobacteriales	Flavobacteriaceae	Flavobacterium
Bai 2015	1	70	Bacteria	188	Bacteroidetes	Flavobacteriia	Flavobacteriales	Flavobacteriaceae	Flavobacterium
Bai 2015	1	71	Bacteria	188	Bacteroidetes	Flavobacteriia	Flavobacteriales	Flavobacteriaceae	Flavobacterium
Bai 2015	1	72	Bacteria	188	Firmicutes	Bacilli	Bacillales	Bacillaceae	Bacillus
Bai 2015	1	73	Bacteria	188	Firmicutes	Bacilli	Bacillales	Bacillaceae	Bacillus
Bai 2015	1	74	Bacteria	188	Firmicutes	Bacilli	Bacillales	Bacillaceae	Bacillus
Bai 2015	1	75	Bacteria	188	Firmicutes	Bacilli	Bacillales	Bacillaceae	Bacillus
Bai 2015	1	76	Bacteria	188	Firmicutes	Bacilli	Bacillales	Bacillaceae	Bacillus
Bai 2015	1	77	Bacteria	188	Firmicutes	Bacilli	Bacillales	Bacillaceae	Bacillus
Bai 2015	1	78	Bacteria	188	Firmicutes	Bacilli	Bacillales	Bacillaceae	Bacillus
Bai 2015	1	79	Bacteria	188	Firmicutes	Bacilli	Bacillales	Paenibacillaceae	Paenibacillus
Bai 2015	1	80	Bacteria	188	Firmicutes	Bacilli	Bacillales	Paenibacillaceae	Paenibacillus
Bai 2015	1	81	Bacteria	188	Firmicutes	Bacilli	Bacillales	Paenibacillaceae	Paenibacillus
Bai 2015	1	82	Bacteria	188	Firmicutes	Bacilli	Bacillales	Paenibacillaceae	Paenibacillus
Bai 2015	1	83	Bacteria	188	Firmicutes	Bacilli	Bacillales	Paenibacillaceae	Paenibacillus
Bai 2015	1	84	Bacteria	188	Firmicutes	Bacilli	Bacillales	Paenibacillaceae	Paenibacillus
Bai 2015	1	85	Bacteria	188	Firmicutes	Bacilli	Bacillales	Paenibacillaceae	Paenibacillus
Bai 2015	1	86	Bacteria	188	Proteobacteria	Alphaproteobacteria	Caulobacterales	Caulobacteraceae	Brevundimonas
Bai 2015	1	87	Bacteria	188	Proteobacteria	Alphaproteobacteria	Caulobacterales	Caulobacteraceae	Brevundimonas
Bai 2015	1	88	Bacteria	188	Proteobacteria	Alphaproteobacteria	Caulobacterales	Caulobacteraceae	Brevundimonas
Bai 2015	1	89	Bacteria	188	Proteobacteria	Alphaproteobacteria	Caulobacterales	Caulobacteraceae	Caulobacter
Bai 2015	1	90	Bacteria	188	Proteobacteria	Alphaproteobacteria	Caulobacterales	Caulobacteraceae	Caulobacter
Bai 2015	1	91	Bacteria	188	Proteobacteria	Alphaproteobacteria	Caulobacterales	Caulobacteraceae	Caulobacter
Bai 2015	1	92	Bacteria	188	Proteobacteria	Alphaproteobacteria	Caulobacterales	Caulobacteraceae	Caulobacter
Bai 2015	1	93	Bacteria	188	Proteobacteria	Alphaproteobacteria	Caulobacterales	Caulobacteraceae	Caulobacter
Bai 2015	1	94	Bacteria	188	Proteobacteria	Alphaproteobacteria	Caulobacterales	Caulobacteraceae	Phenylobacterium
Bai 2015	1	95	Bacteria	188	Proteobacteria	Alphaproteobacteria	Caulobacterales	Caulobacteraceae	Phenylobacterium
Bai 2015	1	96	Bacteria	188	Proteobacteria	Alphaproteobacteria	Rhizobiales	Bradyrhizobiaceae	Afipia
Bai 2015	1	97	Bacteria	188	Proteobacteria	Alphaproteobacteria	Rhizobiales	Bradyrhizobiaceae	Bosea
Bai 2015	1	98	Bacteria	188	Proteobacteria	Alphaproteobacteria	Rhizobiales	Bradyrhizobiaceae	Bosea
Bai 2015	1	99	Bacteria	188	Proteobacteria	Alphaproteobacteria	Rhizobiales	Bradyrhizobiaceae	Bosea
Bai 2015	1	100	Bacteria	188	Proteobacteria	Alphaproteobacteria	Rhizobiales	Hyphomicrobiaceae	Devosia
Bai 2015	1	101	Bacteria	188	Proteobacteria	Alphaproteobacteria	Rhizobiales	Hyphomicrobiaceae	Devosia
Bai 2015	1	102	Bacteria	188	Proteobacteria	Alphaproteobacteria	Rhizobiales	Hyphomicrobiaceae	Devosia
Bai 2015	1	103	Bacteria	188	Proteobacteria	Alphaproteobacteria	Rhizobiales	Hyphomicrobiaceae	Devosia
Bai 2015	1	104	Bacteria	188	Proteobacteria	Alphaproteobacteria	Rhizobiales	Hyphomicrobiaceae	Devosia
Bai 2015	1	105	Bacteria	188	Proteobacteria	Alphaproteobacteria	Rhizobiales	Methylobacteriaceae	Methylobacterium
Bai 2015	1	106	Bacteria	188	Proteobacteria	Alphaproteobacteria	Rhizobiales	Phyllobacteriaceae	Aminobacter
Bai 2015	1	107	Bacteria	188	Proteobacteria	Alphaproteobacteria	Rhizobiales	Phyllobacteriaceae	Hoeflea
Bai 2015	1	108	Bacteria	188	Proteobacteria	Alphaproteobacteria	Rhizobiales	Phyllobacteriaceae	Mesorhizobium
Bai 2015	1	109	Bacteria	188	Proteobacteria	Alphaproteobacteria	Rhizobiales	Phyllobacteriaceae	Mesorhizobium
Bai 2015	1	110	Bacteria	188	Proteobacteria	Alphaproteobacteria	Rhizobiales	Phyllobacteriaceae	Mesorhizobium
Bai 2015	1	111	Bacteria	188	Proteobacteria	Alphaproteobacteria	Rhizobiales	Phyllobacteriaceae	Mesorhizobium
Bai 2015	1	112	Bacteria	188	Proteobacteria	Alphaproteobacteria	Rhizobiales	Phyllobacteriaceae	Mesorhizobium
Bai 2015	1	113	Bacteria	188	Proteobacteria	Alphaproteobacteria	Rhizobiales	Phyllobacteriaceae	Nitratireductor
Bai 2015	1	114	Bacteria	188	Proteobacteria	Alphaproteobacteria	Rhizobiales	Rhizobiaceae	Ensifer
Bai 2015	1	115	Bacteria	188	Proteobacteria	Alphaproteobacteria	Rhizobiales	Rhizobiaceae	Ensifer
Bai 2015	1	116	Bacteria	188	Proteobacteria	Alphaproteobacteria	Rhizobiales	Rhizobiaceae	Ensifer
Bai 2015	1	117	Bacteria	188	Proteobacteria	Alphaproteobacteria	Rhizobiales	Rhizobiaceae	Ensifer
Bai 2015	1	118	Bacteria	188	Proteobacteria	Alphaproteobacteria	Rhizobiales	Rhizobiaceae	Ensifer
Bai 2015	1	119	Bacteria	188	Proteobacteria	Alphaproteobacteria	Rhizobiales	Rhizobiaceae	Ensifer
Bai 2015	1	120	Bacteria	188	Proteobacteria	Alphaproteobacteria	Rhizobiales	Rhizobiaceae	Ensifer
Bai 2015	1	121	Bacteria	188	Proteobacteria	Alphaproteobacteria	Rhizobiales	Rhizobiaceae	Ensifer
Bai 2015	1	122	Bacteria	188	Proteobacteria	Alphaproteobacteria	Rhizobiales	Rhizobiaceae	Ensifer
Bai 2015	1	123	Bacteria	188	Proteobacteria	Alphaproteobacteria	Rhizobiales	Rhizobiaceae	Rhizobium
Bai 2015	1	124	Bacteria	188	Proteobacteria	Alphaproteobacteria	Rhizobiales	Rhizobiaceae	Rhizobium
Bai 2015	1	125	Bacteria	188	Proteobacteria	Alphaproteobacteria	Rhizobiales	Rhizobiaceae	Rhizobium
Bai 2015	1	126	Bacteria	188	Proteobacteria	Alphaproteobacteria	Rhizobiales	Rhizobiaceae	Rhizobium
Bai 2015	1	127	Bacteria	188	Proteobacteria	Alphaproteobacteria	Rhizobiales	Rhizobiaceae	Rhizobium
Bai 2015	1	128	Bacteria	188	Proteobacteria	Alphaproteobacteria	Rhizobiales	Rhizobiaceae	Rhizobium
Bai 2015	1	129	Bacteria	188	Proteobacteria	Alphaproteobacteria	Rhizobiales	Rhizobiaceae	Rhizobium
Bai 2015	1	130	Bacteria	188	Proteobacteria	Alphaproteobacteria	Rhizobiales	Rhizobiaceae	Rhizobium
Bai 2015	1	131	Bacteria	188	Proteobacteria	Alphaproteobacteria	Rhizobiales	Rhizobiaceae	Rhizobium
Bai 2015	1	132	Bacteria	188	Proteobacteria	Alphaproteobacteria	Rhizobiales	Rhizobiaceae	Rhizobium
Bai 2015	1	133	Bacteria	188	Proteobacteria	Alphaproteobacteria	Rhizobiales	Xanthomonadaceae	Lysobacter
Bai 2015	1	134	Bacteria	188	Proteobacteria	Alphaproteobacteria	Rhizobiales	Xanthomonadaceae	Lysobacter
Bai 2015	1	135	Bacteria	188	Proteobacteria	Alphaproteobacteria	Rhizobiales	Xanthomonadaceae	Lysobacter
Bai 2015	1	136	Bacteria	188	Proteobacteria	Alphaproteobacteria	Rhizobiales	Xanthomonadaceae	Lysobacter
Bai 2015	1	137	Bacteria	188	Proteobacteria	Alphaproteobacteria	Rhizobiales	Xanthomonadaceae	Lysobacter
Bai 2015	1	138	Bacteria	188	Proteobacteria	Alphaproteobacteria	Rhizobiales	Xanthomonadaceae	Lysobacter
Bai 2015	1	139	Bacteria	188	Proteobacteria	Alphaproteobacteria	Rhizobiales	Xanthomonadaceae	Lysobacter
Bai 2015	1	140	Bacteria	188	Proteobacteria	Alphaproteobacteria	Rhizobiales	Xanthomonadaceae	Pseudoxanthomonas
Bai 2015	1	141	Bacteria	188	Proteobacteria	Alphaproteobacteria	Rhizobiales	Xanthomonadaceae	Rhodanobacter
Bai 2015	1	142	Bacteria	188	Proteobacteria	Alphaproteobacteria	Rhizobiales	Xanthomonadaceae	Rhodanobacter
Bai 2015	1	143	Bacteria	188	Proteobacteria	Alphaproteobacteria	Rhizobiales	Xanthomonadaceae	Rhodanobacter
Bai 2015	1	144	Bacteria	188	Proteobacteria	Alphaproteobacteria	Rhizobiales	Xanthomonadaceae	Rhodanobacter
Bai 2015	1	145	Bacteria	188	Proteobacteria	Alphaproteobacteria	Sphingomonadales	Erythrobacteraceae	Altererythrobacter
Bai 2015	1	146	Bacteria	188	Proteobacteria	Alphaproteobacteria	Sphingomonadales	Sphingomonadaceae	Sphingomonas
Bai 2015	1	147	Bacteria	188	Proteobacteria	Alphaproteobacteria	Sphingomonadales	Sphingomonadaceae	Sphingomonas
Bai 2015	1	148	Bacteria	188	Proteobacteria	Alphaproteobacteria	Sphingomonadales	Sphingomonadaceae	Sphingomonas
Bai 2015	1	149	Bacteria	188	Proteobacteria	Alphaproteobacteria	Sphingomonadales	Sphingomonadaceae	Sphingomonas
Bai 2015	1	150	Bacteria	188	Proteobacteria	Alphaproteobacteria	Sphingomonadales	Sphingomonadaceae	Sphingopyxis
Bai 2015	1	151	Bacteria	188	Proteobacteria	Alphaproteobacteria	Sphingomonadales	Sphingomonadaceae	Sphingopyxis
Bai 2015	1	152	Bacteria	188	Proteobacteria	Alphaproteobacteria	Sphingomonadales	Sphingomonadaceae	Sphingopyxis
Bai 2015	1	153	Bacteria	188	Proteobacteria	Betaproteobacteria	Burkholderiales	Alcaligenaceae	Bordetella
Bai 2015	1	154	Bacteria	188	Proteobacteria	Betaproteobacteria	Burkholderiales	Alcaligenaceae	Bordetella
Bai 2015	1	155	Bacteria	188	Proteobacteria	Betaproteobacteria	Burkholderiales	Alcaligenaceae	Bordetella
Bai 2015	1	156	Bacteria	188	Proteobacteria	Betaproteobacteria	Burkholderiales	Comamonadaceae	Acidovorax
Bai 2015	1	157	Bacteria	188	Proteobacteria	Betaproteobacteria	Burkholderiales	Comamonadaceae	Acidovorax
Bai 2015	1	158	Bacteria	188	Proteobacteria	Betaproteobacteria	Burkholderiales	Comamonadaceae	Acidovorax
Bai 2015	1	159	Bacteria	188	Proteobacteria	Betaproteobacteria	Burkholderiales	Comamonadaceae	Acidovorax
Bai 2015	1	160	Bacteria	188	Proteobacteria	Betaproteobacteria	Burkholderiales	Comamonadaceae	Acidovorax
Bai 2015	1	161	Bacteria	188	Proteobacteria	Betaproteobacteria	Burkholderiales	Comamonadaceae	Acidovorax
Bai 2015	1	162	Bacteria	188	Proteobacteria	Betaproteobacteria	Burkholderiales	Comamonadaceae	Pelomonas
Bai 2015	1	163	Bacteria	188	Proteobacteria	Betaproteobacteria	Burkholderiales	Comamonadaceae	Pelomonas
Bai 2015	1	164	Bacteria	188	Proteobacteria	Betaproteobacteria	Burkholderiales	Comamonadaceae	Pelomonas
Bai 2015	1	165	Bacteria	188	Proteobacteria	Betaproteobacteria	Burkholderiales	Comamonadaceae	Pelomonas
Bai 2015	1	166	Bacteria	188	Proteobacteria	Betaproteobacteria	Burkholderiales	Comamonadaceae	Variovorax
Bai 2015	1	167	Bacteria	188	Proteobacteria	Betaproteobacteria	Burkholderiales	Comamonadaceae	Variovorax
Bai 2015	1	168	Bacteria	188	Proteobacteria	Betaproteobacteria	Burkholderiales	Comamonadaceae	Variovorax
Bai 2015	1	169	Bacteria	188	Proteobacteria	Betaproteobacteria	Burkholderiales	Comamonadaceae	Variovorax
Bai 2015	1	170	Bacteria	188	Proteobacteria	Betaproteobacteria	Burkholderiales	Oxalobacteraceae	Duganella
Bai 2015	1	171	Bacteria	188	Proteobacteria	Betaproteobacteria	Burkholderiales	Oxalobacteraceae	Duganella
Bai 2015	1	172	Bacteria	188	Proteobacteria	Betaproteobacteria	Burkholderiales	Oxalobacteraceae	Duganella
Bai 2015	1	173	Bacteria	188	Proteobacteria	Betaproteobacteria	Burkholderiales	Oxalobacteraceae	Duganella
Bai 2015	1	174	Bacteria	188	Proteobacteria	Betaproteobacteria	Burkholderiales	Oxalobacteraceae	Massilia
Bai 2015	1	175	Bacteria	188	Proteobacteria	Betaproteobacteria	Burkholderiales	Oxalobacteraceae	Massilia
Bai 2015	1	176	Bacteria	188	Proteobacteria	Betaproteobacteria	Burkholderiales	Oxalobacteraceae	Massilia
Bai 2015	1	177	Bacteria	188	Proteobacteria	Betaproteobacteria	Burkholderiales	Oxalobacteraceae	Massilia
Bai 2015	1	178	Bacteria	188	Proteobacteria	Betaproteobacteria	Burkholderiales	Oxalobacteraceae	Noviherbaspirillum
Bai 2015	1	179	Bacteria	188	Proteobacteria	Gammaproteobacteria	Pseudomonadales	Pseudomonadaceae	Pseudomonas
Bai 2015	1	180	Bacteria	188	Proteobacteria	Gammaproteobacteria	Pseudomonadales	Pseudomonadaceae	Pseudomonas
Bai 2015	1	181	Bacteria	188	Proteobacteria	Gammaproteobacteria	Pseudomonadales	Pseudomonadaceae	Pseudomonas
Bai 2015	1	182	Bacteria	188	Proteobacteria	Gammaproteobacteria	Pseudomonadales	Pseudomonadaceae	Pseudomonas
Bai 2015	1	183	Bacteria	188	Proteobacteria	Gammaproteobacteria	Pseudomonadales	Pseudomonadaceae	Pseudomonas
Bai 2015	1	184	Bacteria	188	Proteobacteria	Gammaproteobacteria	Pseudomonadales	Pseudomonadaceae	Pseudomonas
Bai 2015	1	185	Bacteria	188	Proteobacteria	Gammaproteobacteria	Pseudomonadales	Pseudomonadaceae	Pseudomonas
Bai 2015	1	186	Bacteria	188	Proteobacteria	Gammaproteobacteria	Pseudomonadales	Pseudomonadaceae	Rhizobacter
Bai 2015	1	187	Bacteria	188	Proteobacteria	Gammaproteobacteria	Pseudomonadales	Pseudomonadaceae	Rhizobacter
Bai 2015	1	188	Bacteria	188	Proteobacteria	Gammaproteobacteria	Pseudomonadales	Pseudomonadaceae	Rhizobacter

## Sheet: SynComSize
	Frequency of use	SynCom Size	Numbers repeated		Frequency of use	Plant species
	3	3	3		9	Arabidopsis thaliana
	2	4	3		4	No plant
	1	5	3		3	Solanum lycopersicum
	2	6	4		3	Zea mays
	3	7	4		2	Oryza sativa
	2	8	5		1	Allium sativum
	2	10	6		1	Beta vulgaris
	1	17	6		1	Brassica napus
	2	20	7		1	Brassica oleracea
	1	22	7		1	Medicago sativa
	1	25	7		1	Nicotiana attenuata
	1	32	8		1	Solanum tuberosum
	1	35	8		1	Trifolium pratense
	1	38	10		1	Triticum aestivum
	1	84	10
	1	101	17
	3	185	20
	1	188	22
	1	190	20
			25
			32
			35
			38
			84
			101
			185
			185
			185
			188
			190
		Median	13.5

## Sheet: SynCom Up to 10
Ref	SynCom	Strain no.	Domain	SynCom Size	Phylum	Class	Order	Family	Genus	Species	Strain		Etiquetas de fila	Cuenta de Genus		Etiquetas de fila	Cuenta de Class		Etiquetas de fila	Cuenta de Species
De Vrieze 2018	1	1	Bacteria	3	Proteobacteria	Gammaproteobacteria	Pseudomonadales	Pseudomonadaceae	Pseudomonas	putida	Unclassified		Pseudomonas	31		Actinobacteria	12		Unclassified	41
De Vrieze 2018	1	2	Bacteria	3	Proteobacteria	Gammaproteobacteria	Pseudomonadales	Pseudomonadaceae	Pseudomonas	chlororaphis	Unclassified		Bacillus	18		Actinobacteria	12		fluorescens	8
De Vrieze 2018	1	3	Bacteria	3	Proteobacteria	Gammaproteobacteria	Pseudomonadales	Pseudomonadaceae	Pseudomonas	frederiksbergensis	Unclassified		Flavobacterium	5		Bacteroidetes	10		frederiksbergensis	4
De Vrieze 2018	1	4	Bacteria	3	Proteobacteria	Gammaproteobacteria	Pseudomonadales	Pseudomonadaceae	Pseudomonas	fluorescens	Unclassified		Arthrobacter	3		Chitinophagia	3		megaterium	3
De Vrieze 2018	1	5	Bacteria	3	Proteobacteria	Gammaproteobacteria	Pseudomonadales	Pseudomonadaceae	Pseudomonas	fluorescens	Unclassified		Chitinophaga	3		Flavobacteriia	6		protegens	2
Gadhave 2018	1	1	Bacteria	3	Firmicutes	Bacilli	Bacillales	Bacillaceae	Bacillus	cereus	8 FW Athal		Streptomyces	2		Sphingobacteriia	1		subtilis	2
Gadhave 2018	1	2	Bacteria	3	Firmicutes	Bacilli	Bacillales	Bacillaceae	Bacillus	subtilis	NRRLB23051		Aeromonas	2		Firmicutes	23		cereus	2
Gadhave 2018	1	3	Bacteria	3	Firmicutes	Bacilli	Bacillales	Bacillaceae	Bacillus	amyloliquefaciens	FZB42-BGSC10A6		Oceanobacillus	2		Bacilli	23		putida	2
Ijaz 2019	1	1	Bacteria	3	Firmicutes	Bacilli	Bacillales	Bacillaceae	Bacillus	Unclassified	BTH-11		Janthinobacterium	2		Proteobacteria	51		mojavensis	2
Ijaz 2019	1	2	Bacteria	3	Proteobacteria	Gammaproteobacteria	Pseudomonadales	Pseudomonadaceae	Pseudomonas	Unclassified	MTH-1		Rhizobium	2		Alphaproteobacteria	4		indologenes	1
Ijaz 2019	1	3	Bacteria	3	Proteobacteria	Gammaproteobacteria	Pseudomonadales	Pseudomonadaceae	Pseudomonas	Unclassified	THM-5		Burkholderia	2		Betaproteobacteria	8		succinicans	1
Hartman 2017	1	1	Bacteria	4	Actinobacteria	Actinobacteria	Actinomycetales	Micrococcaceae	Microbacterium	oxydans	Unclassified		Microbacterium	2		Gammaproteobacteria	39		reinekei	1
Hartman 2017	1	2	Bacteria	4	Bacteroidetes	Flavobacteriia	Flavobacteriales	Flavobacteriaceae	Flavobacterium	succinicans	Unclassified		Micrococcus	2		Total general	96		thuringiensis	1
Hartman 2017	1	3	Bacteria	4	Proteobacteria	Betaproteobacteria	Burkholderiales	Oxalobacteraceae	Janthinobacterium	lividum	Unclassified		Variovorax	1					baetica	1
Hartman 2017	1	4	Bacteria	4	Proteobacteria	Gammaproteobacteria	Pseudomonadales	Pseudomonadaceae	Pseudomonas	Unclassified	Unclassified		Serratia	1					prasinopilosus	1
Lee 2020	1	1	Bacteria	4	Actinobacteria	Actinobacteria	Actinomycetales	Brevibacteriaceae	Brevibacterium	frigoritolerans	Unclassified		Pantoea	1					frigoritolerans	1
Lee 2020	1	2	Bacteria	4	Firmicutes	Bacilli	Bacillales	Bacillaceae	Bacillus	niacini	Unclassified		Ochrobactrum	1					polymyxa	1
Lee 2020	1	3	Bacteria	4	Firmicutes	Bacilli	Bacillales	Planococcaceae	Solibacillus	silvestris	Unclassified		Bosea	1					cloacae	1
Lee 2020	1	4	Bacteria	4	Firmicutes	Bacilli	Bacillales	Bacillaceae	Bacillus	luciferensis	Unclassified		Stenotrophomonas	1					pituitosum	1
Santhanam 2019	1	1	Bacteria	5	Actinobacteria	Actinobacteria	Actinomycetales	Micrococcaceae	Arthrobacter	nitroguajacolicus	E46		Achromobacter	1					cedrina	1
Santhanam 2019	1	2	Bacteria	5	Firmicutes	Bacilli	Bacillales	Bacillaceae	Bacillus	megaterium	B55		Staphylococcus	1					paradoxus	1
Santhanam 2019	1	3	Bacteria	5	Firmicutes	Bacilli	Bacillales	Bacillaceae	Bacillus	mojavensis	K1		Chryseobacterium	1					pusillum	1
Santhanam 2019	1	4	Bacteria	5	Proteobacteria	Gammaproteobacteria	Pseudomonadales	Pseudomonadaceae	Pseudomonas	azotoformans	A70		Solibacillus	1					oxydans	1
Santhanam 2019	1	5	Bacteria	5	Proteobacteria	Gammaproteobacteria	Pseudomonadales	Pseudomonadaceae	Pseudomonas	frederiksbergensis	A176		Brevibacterium	1					frisingense	1
Sánchez-Gorostiaga 2019	1	1	Bacteria	6	Firmicutes	Bacilli	Bacillales	Bacillaceae	Bacillus	cereus	Unclassified		Herbaspirillum	1					nitroguajacolicus	1
Sánchez-Gorostiaga 2019	1	2	Bacteria	6	Firmicutes	Bacilli	Bacillales	Bacillaceae	Bacillus	megaterium	Unclassified		Rhodanobacter	1					silvestris	1
Sánchez-Gorostiaga 2019	1	3	Bacteria	6	Firmicutes	Bacilli	Bacillales	Bacillaceae	Bacillus	mojavensis	Unclassified		Enterobacter	1					niacini	1
Sánchez-Gorostiaga 2019	1	4	Bacteria	6	Firmicutes	Bacilli	Bacillales	Bacillaceae	Bacillus	polymyxa	Unclassified		Williamsia	1					defluvii	1
Sánchez-Gorostiaga 2019	1	5	Bacteria	6	Firmicutes	Bacilli	Bacillales	Bacillaceae	Bacillus	subtilis	Unclassified		Dyella	1					amyloliquefaciens	1
Sánchez-Gorostiaga 2019	1	6	Bacteria	6	Firmicutes	Bacilli	Bacillales	Bacillaceae	Bacillus	thuringiensis	Unclassified		Pedobacter	1					chlororaphis	1
Zhuang 2020	1	1	Bacteria	6	Firmicutes	Bacilli	Bacillales	Bacillaceae	Bacillus	simplex	B8-7		Delftia	1					veronii	1
Zhuang 2020	1	2	Bacteria	6	Proteobacteria	Gammaproteobacteria	Pseudomonadales	Pseudomonadaceae	Pseudomonas	cedrina	P3-7		Paenibacillus	1					cepacia	1
Zhuang 2020	1	3	Bacteria	6	Proteobacteria	Gammaproteobacteria	Pseudomonadales	Pseudomonadaceae	Pseudomonas	baetica	P3-22		Curtobacterium	1					simplex	1
Zhuang 2020	1	4	Bacteria	6	Proteobacteria	Gammaproteobacteria	Pseudomonadales	Pseudomonadaceae	Pseudomonas	migulae	P6-3		(en blanco)						brassicacearum	1
Zhuang 2020	1	5	Bacteria	6	Proteobacteria	Gammaproteobacteria	Pseudomonadales	Pseudomonadaceae	Pseudomonas	fluorescens	P6-33		Total general	96					maltophilia	1
Zhuang 2020	1	6	Bacteria	6	Proteobacteria	Gammaproteobacteria	Pseudomonadales	Pseudomonadaceae	Pseudomonas	reinekei	P7-5								azotoformans	1
Zhuang 2020	1	7	Bacteria	6	Proteobacteria	Gammaproteobacteria	Pseudomonadales	Pseudomonadaceae	Pseudomonas	frederiksbergensis	P7-14								luciferensis	1
Carrión 2019	1	1	Bacteria	7	Bacteroidetes	Flavobacteriia	Flavobacteriales	Flavobacteriaceae	Flavobacterium	Unclassified	Fl96								lividum	1
Carrión 2019	1	2	Bacteria	7	Bacteroidetes	Flavobacteriia	Flavobacteriales	Flavobacteriaceae	Flavobacterium	Unclassified	Fl97								migulae	1
Carrión 2019	1	3	Bacteria	7	Bacteroidetes	Flavobacteriia	Flavobacteriales	Flavobacteriaceae	Flavobacterium	Unclassified	Fl98								Total general	96
Carrión 2019	1	4	Bacteria	7	Bacteroidetes	Flavobacteriia	Flavobacteriales	Flavobacteriaceae	Flavobacterium	Unclassified	5B
Carrión 2019	1	5	Bacteria	7	Bacteroidetes	Chitinophagia	Sphingobacteriales	Chitinophagaceae	Chitinophaga	Unclassified	Ch93
Carrión 2019	1	6	Bacteria	7	Bacteroidetes	Chitinophagia	Sphingobacteriales	Chitinophagaceae	Chitinophaga	Unclassified	Ch94
Carrión 2019	1	7	Bacteria	7	Bacteroidetes	Chitinophagia	Sphingobacteriales	Chitinophagaceae	Chitinophaga	Unclassified	Ch95
Niu 2018	1	1	Bacteria	7	Proteobacteria	Gammaproteobacteria	Xanthomonadales	Xanthomonadaceae	Stenotrophomonas	maltophilia	ZK5342
Niu 2018	1	2	Bacteria	7	Proteobacteria	Alphaproteobacteria	Rhizobiales	Brucellaceae	Ochrobactrum	pituitosum	ZK5343
Niu 2018	1	3	Bacteria	7	Actinobacteria	Actinobacteria	Actinomycetales	Microbacteriaceae	Curtobacterium	pusillum	ZK5344
Niu 2018	1	4	Bacteria	7	Proteobacteria	Gammaproteobacteria	Enterobacterales	Enterobacteriaceae	Enterobacter	cloacae	ZK5345
Niu 2018	1	5	Bacteria	7	Bacteroidetes	Flavobacteriia	Flavobacteriales	Flavobacteriaceae	Chryseobacterium	indologenes	ZK5346
Niu 2018	1	6	Bacteria	7	Proteobacteria	Betaproteobacteria	Burkholderiales	Oxalobacteraceae	Herbaspirillum	frisingense	ZK5347
Niu 2018	1	7	Bacteria	7	Proteobacteria	Gammaproteobacteria	Pseudomonadales	Pseudomonadaceae	Pseudomonas	putida	ZK5348
Zheng 2019	1	1	Bacteria	7	Actinobacteria	Actinobacteria	Actinomycetales	Micrococcaceae	Arthrobacter	defluvii	06-OD12
Zheng 2019	1	2	Bacteria	7	Actinobacteria	Actinobacteria	Actinomycetales	Streptomycetaceae	Streptomyces	prasinopilosus	34-Y1
Zheng 2019	1	3	Bacteria	7	Firmicutes	Bacilli	Bacillales	Bacillaceae	Bacillus	megaterium	CS22
Zheng 2019	1	4	Bacteria	7	Proteobacteria	Betaproteobacteria	Burkholderiales	Burkholderiaceae	Burkholderia	cepacia	51-Y1415
Zheng 2019	1	5	Bacteria	7	Proteobacteria	Betaproteobacteria	Burkholderiales	Comamonadaceae	Variovorax	paradoxus	19-D4
Zheng 2019	1	6	Bacteria	7	Proteobacteria	Gammaproteobacteria	Pseudomonadales	Pseudomonadaceae	Pseudomonas	frederiksbergensis	11-D3
Zheng 2019	1	7	Bacteria	7	Proteobacteria	Gammaproteobacteria	Xanthomonadales	Xanthomonadaceae	Rhodanobacter	Unclassified	25-Y8
Hu 2016	1	1	Bacteria	8	Proteobacteria	Gammaproteobacteria	Pseudomonadales	Pseudomonadaceae	Pseudomonas	brassicacearum	Q8R1-96
Hu 2016	1	2	Bacteria	8	Proteobacteria	Gammaproteobacteria	Pseudomonadales	Pseudomonadaceae	Pseudomonas	fluorescens	1M1-96
Hu 2016	1	3	Bacteria	8	Proteobacteria	Gammaproteobacteria	Pseudomonadales	Pseudomonadaceae	Pseudomonas	fluorescens	F113
Hu 2016	1	4	Bacteria	8	Proteobacteria	Gammaproteobacteria	Pseudomonadales	Pseudomonadaceae	Pseudomonas	fluorescens	MVP1-4
Hu 2016	1	5	Bacteria	8	Proteobacteria	Gammaproteobacteria	Pseudomonadales	Pseudomonadaceae	Pseudomonas	fluorescens	Phl1C2
Hu 2016	1	6	Bacteria	8	Proteobacteria	Gammaproteobacteria	Pseudomonadales	Pseudomonadaceae	Pseudomonas	fluorescens	Q2-87
Hu 2016	1	7	Bacteria	8	Proteobacteria	Gammaproteobacteria	Pseudomonadales	Pseudomonadaceae	Pseudomonas	protegens	CHA0
Hu 2016	1	8	Bacteria	8	Proteobacteria	Gammaproteobacteria	Pseudomonadales	Pseudomonadaceae	Pseudomonas	protegens	Pf-5
Moccia 2020	1	1	Bacteria	8	Actinobacteria	Actinobacteria	Actinomycetales	Micrococcaceae	Arthrobacter	Unclassified	R85
Moccia 2020	1	2	Bacteria	8	Actinobacteria	Actinobacteria	Actinomycetales	Micrococcaceae	Micrococcus	Unclassified	R34
Moccia 2020	1	3	Bacteria	8	Actinobacteria	Actinobacteria	Actinomycetales	Micrococcaceae	Micrococcus	Unclassified	R36
Moccia 2020	1	4	Bacteria	8	Actinobacteria	Actinobacteria	Actinomycetales	Streptomycetaceae	Streptomyces	Unclassified	R81
Moccia 2020	1	5	Bacteria	8	Actinobacteria	Actinobacteria	Corynebacteriales	Williamsiaceae	Williamsia	Unclassified	R60
Moccia 2020	1	6	Bacteria	8	Firmicutes	Bacilli	Bacillales	Bacillaceae	Bacillus	Unclassified	R1
Moccia 2020	1	7	Bacteria	8	Firmicutes	Bacilli	Bacillales	Bacillaceae	Oceanobacillus	Unclassified	R79
Moccia 2020	1	8	Bacteria	8	Firmicutes	Bacilli	Bacillales	Bacillaceae	Oceanobacillus	Unclassified	R86
Moccia 2020	1	9	Bacteria	8	Firmicutes	Bacilli	Bacillales	Staphylococcaceae	Staphylococcus	Unclassified	R61
Moccia 2020	1	10	Bacteria	8	Proteobacteria	Gammaproteobacteria	Enterobacterales	Enterobacteriaceae	Pantoea	Unclassified	R4
Moronta Barrios 2018	1	1	Bacteria	10	Proteobacteria	Gammaproteobacteria	Pseudomonadales	Pseudomonadaceae	Pseudomonas	Unclassified	E1108
Moronta Barrios 2018	1	2	Bacteria	10	Proteobacteria	Gammaproteobacteria	Pseudomonadales	Pseudomonadaceae	Pseudomonas	Unclassified	E1205
Moronta Barrios 2018	1	3	Bacteria	10	Proteobacteria	Gammaproteobacteria	Pseudomonadales	Pseudomonadaceae	Pseudomonas	Unclassified	E1308
Moronta Barrios 2018	1	4	Bacteria	10	Proteobacteria	Gammaproteobacteria	Pseudomonadales	Pseudomonadaceae	Pseudomonas	Unclassified	E2333
Moronta Barrios 2018	1	5	Bacteria	10	Proteobacteria	Gammaproteobacteria	Aeromonadales	Aeromonadaceae	Aeromonas	Unclassified	E2102
Moronta Barrios 2018	1	6	Bacteria	10	Proteobacteria	Gammaproteobacteria	Aeromonadales	Aeromonadaceae	Aeromonas	veronii	E2205
Moronta Barrios 2018	1	7	Bacteria	10	Proteobacteria	Gammaproteobacteria	Enterobacterales	Yersiniaceae	Serratia	Unclassified	E2309
Moronta Barrios 2018	1	8	Bacteria	10	Firmicutes	Bacilli	Bacillales	Bacillaceae	Bacillus	Unclassified	E2315
Moronta Barrios 2018	1	9	Bacteria	10	Proteobacteria	Alphaproteobacteria	Rhizobiales	Rhizobiaceae	Rhizobium	Unclassified	E2321
Moronta Barrios 2018	1	10	Bacteria	10	Proteobacteria	Betaproteobacteria	Burkholderiales	Comamonadaceae	Delftia	Unclassified	E2330
Schulz-Bohm 2015	1	1	Bacteria	10	Proteobacteria	Betaproteobacteria	Burkholderiales	Alcaligenaceae	Achromobacter	Unclassified	58-38
Schulz-Bohm 2015	1	2	Bacteria	10	Proteobacteria	Alphaproteobacteria	Rhizobiales	Bradyrhizobiaceae	Bosea	Unclassified	AD132
Schulz-Bohm 2015	1	3	Bacteria	10	Proteobacteria	Betaproteobacteria	Burkholderiales	Burkholderiaceae	Burkholderia	Unclassified	AD024
Schulz-Bohm 2015	1	4	Bacteria	10	Proteobacteria	Gammaproteobacteria	Xanthomonadales	Xanthomonadaceae	Dyella	Unclassified	AD056
Schulz-Bohm 2015	1	5	Bacteria	10	Proteobacteria	Betaproteobacteria	Burkholderiales	Oxalobacteraceae	Janthinobacterium	Unclassified	AD080
Schulz-Bohm 2015	1	6	Bacteria	10	Actinobacteria	Actinobacteria	Micrococcales	Microbacteriaceae	Microbacterium	Unclassified	AD141
Schulz-Bohm 2015	1	7	Bacteria	10	Firmicutes	Bacilli	Bacillales	Paenibacillaceae	Paenibacillus	Unclassified	AD087
Schulz-Bohm 2015	1	8	Bacteria	10	Bacteroidetes	Sphingobacteriia	Sphingobacteriales	Sphingobacteriaceae	Pedobacter	Unclassified	V48
Schulz-Bohm 2015	1	9	Bacteria	10	Proteobacteria	Gammaproteobacteria	Pseudomonadales	Pseudomonadaceae	Pseudomonas	Unclassified	AD021
Schulz-Bohm 2015	1	10	Bacteria	10	Proteobacteria	Alphaproteobacteria	Rhizobiales	Rhizobiaceae	Rhizobium	Unclassified	45-29

## Sheet: Proteobacterias
Ref	SynCom	Strain no.	Domain	SynCom Size	Phylum	Class	Order	Family	Genus	Species	Strain		Etiquetas de fila	Cuenta de Family		Ranking	Family
Ijaz 2019	1	2	Bacteria	3	Proteobacteria	Gammaproteobacteria	Pseudomonadales	Pseudomonadaceae	Pseudomonas		MTH-1		Alphaproteobacteria	362		185	Rhizobiaceae
Ijaz 2019	1	3	Bacteria	3	Proteobacteria	Gammaproteobacteria	Pseudomonadales	Pseudomonadaceae	Pseudomonas		THM-5		Bradyrhizobiaceae	12		164	Xanthomonadaceae
Santhanam 2019	1	4	Bacteria	5	Proteobacteria	Gammaproteobacteria	Pseudomonadales	Pseudomonadaceae	Pseudomonas	azotoformans	A70		Brucellaceae	8		73	Pseudomonadaceae
Santhanam 2019	1	5	Bacteria	5	Proteobacteria	Gammaproteobacteria	Pseudomonadales	Pseudomonadaceae	Pseudomonas	frederiksbergensis	A176		Caulobacteraceae	30		62	Sphingomonadaceae
Vrieze 2018	1	1	Bacteria	5	Proteobacteria	Gammaproteobacteria	Pseudomonadales	Pseudomonadaceae	Pseudomonas	putida			Erythrobacteraceae	4		51	Comamonadaceae
Vrieze 2018	1	2	Bacteria	5	Proteobacteria	Gammaproteobacteria	Pseudomonadales	Pseudomonadaceae	Pseudomonas	chlororaphis			Hyphomicrobiaceae	12		30	Caulobacteraceae
Vrieze 2018	1	3	Bacteria	5	Proteobacteria	Gammaproteobacteria	Pseudomonadales	Pseudomonadaceae	Pseudomonas	frederiksbergensis			Methylobacteriaceae	16		18	Phyllobacteriaceae
Vrieze 2018	1	4	Bacteria	5	Proteobacteria	Gammaproteobacteria	Pseudomonadales	Pseudomonadaceae	Pseudomonas	fluorescens			Phyllobacteriaceae	18		18	Oxalobacteraceae
Vrieze 2018	1	5	Bacteria	5	Proteobacteria	Gammaproteobacteria	Pseudomonadales	Pseudomonadaceae	Pseudomonas	fluorescens			Rhizobiaceae	185		17	Burkholderiaceae
Niu 2018	1	1	Bacteria	7	Proteobacteria	Gammaproteobacteria	Xanthomonadales	Xanthomonadaceae	Stenotrophomonas	maltophilia	ZK5342		Sneathiellaceae	1		16	Methylobacteriaceae
Niu 2018	1	2	Bacteria	7	Proteobacteria	Alphaproteobacteria	Rhizobiales	Brucellaceae	Ochrobactrum	pituitosum	ZK5343		Sphingomonadaceae	62		14	Enterobacteriaceae
Niu 2018	1	4	Bacteria	7	Proteobacteria	Gammaproteobacteria	Enterobacterales	Enterobacteriaceae	Enterobacter	cloacae	ZK5345		Xanthobacteraceae	2		12	Bradyrhizobiaceae
Niu 2018	1	6	Bacteria	7	Proteobacteria	Betaproteobacteria	Burkholderiales	Oxalobacteraceae	Herbaspirillum	frisingense	ZK5347		Xanthomonadaceae	12		12	Hyphomicrobiaceae
Niu 2018	1	7	Bacteria	7	Proteobacteria	Gammaproteobacteria	Pseudomonadales	Pseudomonadaceae	Pseudomonas	putida	ZK5348		Gammaproteobacteria	269		12	Xanthomonadaceae
Zhang 2019	1	11	Bacteria	7	Proteobacteria	Alphaproteobacteria	Caulobacterales	Caulobacteraceae	Phenylobacterium		R1418		Aeromonadaceae	2		8	Brucellaceae
Zhang 2019	1	12	Bacteria	7	Proteobacteria	Alphaproteobacteria	Caulobacterales	Caulobacteraceae	Asticcacaulis		R1388b		Enterobacteriaceae	14		8	Rhodanobacteraceae
Zhang 2019	1	13	Bacteria	7	Proteobacteria	Alphaproteobacteria	Rhizobiales	Hyphomicrobiaceae	Devosia		R1396		Moraxellaceae	7		7	Moraxellaceae
Zhang 2019	1	14	Bacteria	7	Proteobacteria	Alphaproteobacteria	Rhizobiales	Hyphomicrobiaceae	Devosia		R1889		Pseudomonadaceae	73		6	Alcaligenaceae
Zhang 2019	1	15	Bacteria	7	Proteobacteria	Alphaproteobacteria	Rhizobiales	Rhizobiaceae	Rhizobium		R115		Rhodanobacteraceae	8		4	Erythrobacteraceae
Zhang 2019	1	16	Bacteria	7	Proteobacteria	Alphaproteobacteria	Rhizobiales	Xanthobacteraceae	Pseudolabrys		R992		Xanthomonadaceae	164		3	Ralstoniaceae
Zhang 2019	1	17	Bacteria	7	Proteobacteria	Betaproteobacteria	Burkholderiales	Comamonadaceae	Acidovorax		R3		Yersiniaceae	1		2	Xanthobacteraceae
Zhang 2019	1	18	Bacteria	7	Proteobacteria	Betaproteobacteria	Burkholderiales	Oxalobacteraceae	Herbaspirillum		R1515		Betaproteobacteria	97		2	Aeromonadaceae
Zhang 2019	1	19	Bacteria	7	Proteobacteria	Betaproteobacteria	Burkholderiales	Unclassified	Piscinibacter		R1287		Alcaligenaceae	6		1	Sneathiellaceae
Zhang 2019	1	20	Bacteria	7	Proteobacteria	Betaproteobacteria	Neisseriales	Neisseriaceae	Vogesella				Burkholderiaceae	17		1	Yersiniaceae
Zheng 2019	1	4	Bacteria	7	Proteobacteria	Betaproteobacteria	Burkholderiales	Burkholderiaceae	Burkholderia	cepacia	51-Y1415		Comamonadaceae	51		1	Neisseriaceae
Zheng 2019	1	5	Bacteria	7	Proteobacteria	Betaproteobacteria	Burkholderiales	Comamonadaceae	Variovorax	paradoxus	19-D4		Neisseriaceae	1		1	Unclassified
Zheng 2019	1	6	Bacteria	7	Proteobacteria	Gammaproteobacteria	Pseudomonadales	Pseudomonadaceae	Pseudomonas	frederiksbergensis	11-D3		Oxalobacteraceae	18
Zheng 2019	1	7	Bacteria	7	Proteobacteria	Gammaproteobacteria	Xanthomonadales	Xanthomonadaceae	Rhodanobacter		25-Y8		Ralstoniaceae	3
Zhuang 2020	1	2	Bacteria	7	Proteobacteria	Gammaproteobacteria	Pseudomonadales	Pseudomonadaceae	Pseudomonas	cedrina	P3-7		Unclassified	1
Zhuang 2020	1	3	Bacteria	7	Proteobacteria	Gammaproteobacteria	Pseudomonadales	Pseudomonadaceae	Pseudomonas	baetica	P3-22		(en blanco)
Zhuang 2020	1	4	Bacteria	7	Proteobacteria	Gammaproteobacteria	Pseudomonadales	Pseudomonadaceae	Pseudomonas	migulae	P6-3		(en blanco)
Zhuang 2020	1	5	Bacteria	7	Proteobacteria	Gammaproteobacteria	Pseudomonadales	Pseudomonadaceae	Pseudomonas	fluorescens	P6-33		Total general	728
Zhuang 2020	1	6	Bacteria	7	Proteobacteria	Gammaproteobacteria	Pseudomonadales	Pseudomonadaceae	Pseudomonas	reinekei	P7-5
Zhuang 2020	1	7	Bacteria	7	Proteobacteria	Gammaproteobacteria	Pseudomonadales	Pseudomonadaceae	Pseudomonas	frederiksbergensis	P7-14
Hu 2016	1	1	Bacteria	8	Proteobacteria	Gammaproteobacteria	Pseudomonadales	Pseudomonadaceae	Pseudomonas	brassicacearum	Q8R1-96
Hu 2016	1	2	Bacteria	8	Proteobacteria	Gammaproteobacteria	Pseudomonadales	Pseudomonadaceae	Pseudomonas	fluorescens	1M1-96
Hu 2016	1	3	Bacteria	8	Proteobacteria	Gammaproteobacteria	Pseudomonadales	Pseudomonadaceae	Pseudomonas	fluorescens	F113
Hu 2016	1	4	Bacteria	8	Proteobacteria	Gammaproteobacteria	Pseudomonadales	Pseudomonadaceae	Pseudomonas	fluorescens	MVP1-4
Hu 2016	1	5	Bacteria	8	Proteobacteria	Gammaproteobacteria	Pseudomonadales	Pseudomonadaceae	Pseudomonas	fluorescens	Phl1C2
Hu 2016	1	6	Bacteria	8	Proteobacteria	Gammaproteobacteria	Pseudomonadales	Pseudomonadaceae	Pseudomonas	fluorescens	Q2-87
Hu 2016	1	7	Bacteria	8	Proteobacteria	Gammaproteobacteria	Pseudomonadales	Pseudomonadaceae	Pseudomonas	protegens	CHA0
Hu 2016	1	8	Bacteria	8	Proteobacteria	Gammaproteobacteria	Pseudomonadales	Pseudomonadaceae	Pseudomonas	protegens	Pf-5
Moccia 2020	1	10	Bacteria	10	Proteobacteria	Gammaproteobacteria	Enterobacterales	Enterobacteriaceae	Pantoea		R4
Moronta Barrios 2018	1	1	Bacteria	10	Proteobacteria	Gammaproteobacteria	Pseudomonadales	Pseudomonadaceae	Pseudomonas		E1108
Moronta Barrios 2018	1	2	Bacteria	10	Proteobacteria	Gammaproteobacteria	Pseudomonadales	Pseudomonadaceae	Pseudomonas		E1205
Moronta Barrios 2018	1	3	Bacteria	10	Proteobacteria	Gammaproteobacteria	Pseudomonadales	Pseudomonadaceae	Pseudomonas		E1308
Moronta Barrios 2018	1	4	Bacteria	10	Proteobacteria	Gammaproteobacteria	Pseudomonadales	Pseudomonadaceae	Pseudomonas		E2333
Moronta Barrios 2018	1	5	Bacteria	10	Proteobacteria	Gammaproteobacteria	Aeromonadales	Aeromonadaceae	Aeromonas		E2102
Moronta Barrios 2018	1	6	Bacteria	10	Proteobacteria	Gammaproteobacteria	Aeromonadales	Aeromonadaceae	Aeromonas	veronii	E2205
Moronta Barrios 2018	1	7	Bacteria	10	Proteobacteria	Gammaproteobacteria	Enterobacterales	Yersiniaceae	Serratia		E2309
Moronta Barrios 2018	1	9	Bacteria	10	Proteobacteria	Alphaproteobacteria	Rhizobiales	Rhizobiaceae	Rhizobium		E2321
Moronta Barrios 2018	1	10	Bacteria	10	Proteobacteria	Betaproteobacteria	Burkholderiales	Comamonadaceae	Delftia		E2330
Schulz-Bohm 2015	1	1	Bacteria	10	Proteobacteria	Betaproteobacteria	Burkholderiales	Alcaligenaceae	Achromobacter		58-38
Schulz-Bohm 2015	1	2	Bacteria	10	Proteobacteria	Alphaproteobacteria	Rhizobiales	Bradyrhizobiaceae	Bosea		AD132
Schulz-Bohm 2015	1	3	Bacteria	10	Proteobacteria	Betaproteobacteria	Burkholderiales	Burkholderiaceae	Burkholderia		AD024
Schulz-Bohm 2015	1	4	Bacteria	10	Proteobacteria	Gammaproteobacteria	Xanthomonadales	Xanthomonadaceae	Dyella		AD056
Schulz-Bohm 2015	1	5	Bacteria	10	Proteobacteria	Betaproteobacteria	Burkholderiales	Oxalobacteraceae	Janthinobacterium		AD080
Schulz-Bohm 2015	1	9	Bacteria	10	Proteobacteria	Gammaproteobacteria	Pseudomonadales	Pseudomonadaceae	Pseudomonas		AD021
Schulz-Bohm 2015	1	10	Bacteria	10	Proteobacteria	Alphaproteobacteria	Rhizobiales	Rhizobiaceae	Rhizobium		45-29
Armanhi 2018	1	1	Bacteria	19	Proteobacteria	Betaproteobacteria	Burkholderiales	Comamonadaceae	Ottowia
Armanhi 2018	1	2	Bacteria	19	Proteobacteria	Alphaproteobacteria	Caulobacterales	Caulobacteraceae	Asticcacaulis
Armanhi 2018	1	3	Bacteria	19	Proteobacteria	Gammaproteobacteria	Enterobacterales	Enterobacteriaceae	Enterobacter
Armanhi 2018	1	4	Bacteria	19	Proteobacteria	Gammaproteobacteria	Enterobacterales	Enterobacteriaceae	Pantoea
Armanhi 2018	1	6	Bacteria	19	Proteobacteria	Alphaproteobacteria	Rhizobiales	Bradyrhizobiaceae	Bosea
Armanhi 2018	1	7	Bacteria	19	Proteobacteria	Alphaproteobacteria	Rhizobiales	Rhizobiaceae	Rhizobium
Armanhi 2018	1	8	Bacteria	19	Proteobacteria	Alphaproteobacteria	Rhizobiales	Rhizobiaceae	Ensifer
Armanhi 2018	1	12	Bacteria	19	Proteobacteria	Alphaproteobacteria	Sphingomonadales	Sphingomonadaceae	Sphingomonas
Armanhi 2018	1	14	Bacteria	19	Proteobacteria	Gammaproteobacteria	Xanthomonadales	Xanthomonadaceae	Dyella
Armanhi 2018	1	15	Bacteria	19	Proteobacteria	Gammaproteobacteria	Xanthomonadales	Xanthomonadaceae	Dyella
Armanhi 2018	1	16	Bacteria	19	Proteobacteria	Gammaproteobacteria	Xanthomonadales	Xanthomonadaceae	Lysobacter
Armanhi 2018	1	17	Bacteria	19	Proteobacteria	Gammaproteobacteria	Xanthomonadales	Xanthomonadaceae	Stenotrophomonas
Armanhi 2018	1	18	Bacteria	19	Proteobacteria	Gammaproteobacteria	Xanthomonadales	Xanthomonadaceae	Stenotrophomonas
Armanhi 2018	1	19	Bacteria	19	Proteobacteria	Gammaproteobacteria	Xanthomonadales	Xanthomonadaceae	Pseudoxanthomonas
Voges 2019	1	11	Bacteria	22	Proteobacteria	Alphaproteobacteria	Rhizobiales	Methylobacteriaceae	Methylobacterium		Root483D1
Voges 2019	1	12	Bacteria	22	Proteobacteria	Alphaproteobacteria	Rhizobiales	Rhizobiaceae	Rhizobium		Root149
Voges 2019	1	13	Bacteria	22	Proteobacteria	Alphaproteobacteria	Rhizobiales	Rhizobiaceae	Agrobacterium		Root491
Voges 2019	1	14	Bacteria	22	Proteobacteria	Alphaproteobacteria	Rhizobiales	Rhizobiaceae	Sinorhizobium		Root1312
Voges 2019	1	15	Bacteria	22	Proteobacteria	Alphaproteobacteria	Sphingomonadales	Sphingomonadaceae	Sphingopyxis		Root1497
Voges 2019	1	16	Bacteria	22	Proteobacteria	Betaproteobacteria	Burkholderiales	Comamonadaceae	Acidovorax		Root70
Voges 2019	1	17	Bacteria	22	Proteobacteria	Betaproteobacteria	Burkholderiales	Alcaligenaceae	Achromobacter		Root170
Voges 2019	1	18	Bacteria	22	Proteobacteria	Betaproteobacteria	Burkholderiales	Oxalobacteraceae	Herbaspirillum		Root189
Voges 2019	1	19	Bacteria	22	Proteobacteria	Gammaproteobacteria	Pseudomonadales	Pseudomonadaceae	Pseudomonas		Root9
Voges 2019	1	20	Bacteria	22	Proteobacteria	Gammaproteobacteria	Xanthomonadales	Xanthomonadaceae	Rhodanobacter		Root561
Voges 2019	1	21	Bacteria	22	Proteobacteria	Gammaproteobacteria	Xanthomonadales	Xanthomonadaceae	Pseudoxanthomonas		Root630
Voges 2019	1	22	Bacteria	22	Proteobacteria	Gammaproteobacteria	Pseudomonadales	Moraxellaceae	Acinetobacter		Root1280
CorreadeSouza 2019	1	1	Bacteria	25	Proteobacteria	Alphaproteobacteria	Rhizobiales	Rhizobiaceae	Agrobacterium		B08
CorreadeSouza 2019	1	2	Bacteria	25	Proteobacteria	Alphaproteobacteria	Rhizobiales	Rhizobiaceae	Agrobacterium		E09
CorreadeSouza 2019	1	3	Bacteria	25	Proteobacteria	Alphaproteobacteria	Caulobacterales	Caulobacteraceae	Asticcacaulis		F02
CorreadeSouza 2019	1	4	Bacteria	25	Proteobacteria	Betaproteobacteria	Burkholderiales	Burkholderiaceae	Burkholderia		A10
CorreadeSouza 2019	1	5	Bacteria	25	Proteobacteria	Gammaproteobacteria	Xanthomonadales	Xanthomonadaceae	Dyella		G12
CorreadeSouza 2019	1	6	Bacteria	25	Proteobacteria	Alphaproteobacteria	Rhizobiales	Rhizobiaceae	Ensifer		D05
CorreadeSouza 2019	1	7	Bacteria	25	Proteobacteria	Alphaproteobacteria	Rhizobiales	Rhizobiaceae	Ensifer		B04
CorreadeSouza 2019	1	8	Bacteria	25	Proteobacteria	Gammaproteobacteria	Enterobacterales	Enterobacteriaceae	Enterobacter		B02
CorreadeSouza 2019	1	9	Bacteria	25	Proteobacteria	Gammaproteobacteria	Enterobacterales	Enterobacteriaceae	Enterobacter		F08
CorreadeSouza 2019	1	10	Bacteria	25	Proteobacteria	Gammaproteobacteria	Enterobacterales	Enterobacteriaceae	Enterobacter		G08
CorreadeSouza 2019	1	11	Bacteria	25	Proteobacteria	Gammaproteobacteria	Enterobacterales	Enterobacteriaceae	Enterobacter		G12
CorreadeSouza 2019	1	12	Bacteria	25	Proteobacteria	Gammaproteobacteria	Enterobacterales	Enterobacteriaceae	Enterobacter		H03
CorreadeSouza 2019	1	13	Bacteria	25	Proteobacteria	Gammaproteobacteria	Xanthomonadales	Xanthomonadaceae	Lysobacter		A02
CorreadeSouza 2019	1	15	Bacteria	25	Proteobacteria	Gammaproteobacteria	Enterobacterales	Enterobacteriaceae	Pantoea		B02
CorreadeSouza 2019	1	16	Bacteria	25	Proteobacteria	Gammaproteobacteria	Enterobacterales	Enterobacteriaceae	Pantoea		C12
CorreadeSouza 2019	1	19	Bacteria	25	Proteobacteria	Alphaproteobacteria	Sphingomonadales	Sphingomonadaceae	Sphingomonas		D05
CorreadeSouza 2019	1	20	Bacteria	25	Proteobacteria	Gammaproteobacteria	Xanthomonadales	Xanthomonadaceae	Stenotrophomonas		B02
CorreadeSouza 2019	1	21	Bacteria	25	Proteobacteria	Gammaproteobacteria	Xanthomonadales	Xanthomonadaceae	Stenotrophomonas		E09
CorreadeSouza 2019	1	23	Bacteria	25	Proteobacteria	Alphaproteobacteria	Rhizobiales	Bradyrhizobiaceae			C05
CorreadeSouza 2019	1	24	Bacteria	25	Proteobacteria	Gammaproteobacteria	Xanthomonadales	Xanthomonadaceae			G08
CorreadeSouza 2019	1	25	Bacteria	25	Proteobacteria	Betaproteobacteria	Burkholderiales	Comamonadaceae	Variovorax		F04
Tsolakidou 2019	1	1	Bacteria	25	Proteobacteria	Alphaproteobacteria	Rhizobiales	Rhizobiaceae	Agrobacterium	tumefaciens	2Ba4
Tsolakidou 2019	1	12	Bacteria	25	Proteobacteria	Gammaproteobacteria	Enterobacterales	Enterobacteriaceae	Enterobacter	cloacae	2Ba30
Tsolakidou 2019	1	13	Bacteria	25	Proteobacteria	Gammaproteobacteria	Xanthomonadales	Xanthomonadaceae	Luteimonas	mephitis	1Ba33
Tsolakidou 2019	1	18	Bacteria	25	Proteobacteria	Alphaproteobacteria	Rhizobiales	Brucellaceae	Ochrobactrum		2Ba42
Tsolakidou 2019	1	19	Bacteria	25	Proteobacteria	Alphaproteobacteria	Rhizobiales	Brucellaceae	Ochrobactrum		2Ba51
Tsolakidou 2019	1	20	Bacteria	25	Proteobacteria	Gammaproteobacteria	Pseudomonadales	Pseudomonadaceae	Pseudomonas	anguilliseptica	1Ba33
Tsolakidou 2019	1	21	Bacteria	25	Proteobacteria	Gammaproteobacteria	Pseudomonadales	Pseudomonadaceae	Pseudomonas	putida	3Ba4
Tsolakidou 2019	1	22	Bacteria	25	Proteobacteria	Gammaproteobacteria	Xanthomonadales	Xanthomonadaceae	Stenotrophomonas	maltophilia	1Ba16
Tsolakidou 2019	1	23	Bacteria	25	Proteobacteria	Gammaproteobacteria	Xanthomonadales	Xanthomonadaceae	Stenotrophomonas	maltophilia	2Ba27
Tsolakidou 2019	1	24	Bacteria	25	Proteobacteria	Gammaproteobacteria	Xanthomonadales	Xanthomonadaceae	Stenotrophomonas	maltophilia	2Ba50
Tsolakidou 2019	1	25	Bacteria	25	Proteobacteria	Gammaproteobacteria	Xanthomonadales	Xanthomonadaceae	Stenotrophomonas	maltophilia	2Ba32
Hu 2020	11	7	Bacteria	32	Proteobacteria	Alphaproteobacteria	Rhizobiales	Rhizobiaceae	Ensifer
Hu 2020	3	8	Bacteria	32	Proteobacteria	Alphaproteobacteria	Sphingomonadales	Erythrobacteraceae	Erythromicrobium
Hu 2020	9	8	Bacteria	32	Proteobacteria	Alphaproteobacteria	Sphingomonadales	Erythrobacteraceae	Altererythrobacter
Hu 2020	10	8	Bacteria	32	Proteobacteria	Alphaproteobacteria	Sphingomonadales	Sphingomonadaceae	Sphingobium
Hu 2020	11	8	Bacteria	32	Proteobacteria	Gammaproteobacteria	Xanthomonadales	Xanthomonadaceae	Arenimonas
Hu 2020	9	9	Bacteria	32	Proteobacteria	Alphaproteobacteria	Sphingomonadales	Erythrobacteraceae	Erythromicrobium
Hu 2020	10	9	Bacteria	32	Proteobacteria	Alphaproteobacteria	Sphingomonadales	Sphingomonadaceae	Sphingomonas
Hu 2020	12	9	Bacteria	32	Proteobacteria	Alphaproteobacteria	Sphingomonadales	Sphingomonadaceae	Sphingobium
Hu 2020	3	9	Bacteria	32	Proteobacteria	Gammaproteobacteria	Xanthomonadales	Xanthomonadaceae	Arenimonas
Hu 2020	11	9	Bacteria	32	Proteobacteria	Gammaproteobacteria	Xanthomonadales	Xanthomonadaceae	Lysobacter
Hu 2020	9	10	Bacteria	32	Proteobacteria	Alphaproteobacteria	Sphingomonadales	Sphingomonadaceae	Rhizorhapis
Hu 2020	10	10	Bacteria	32	Proteobacteria	Alphaproteobacteria	Sphingomonadales	Sphingomonadaceae	Sphingopyxis
Hu 2020	12	10	Bacteria	32	Proteobacteria	Alphaproteobacteria	Sphingomonadales	Sphingomonadaceae	Sphingobium
Hu 2020	3	10	Bacteria	32	Proteobacteria	Gammaproteobacteria	Xanthomonadales	Xanthomonadaceae	Arenimonas
Hu 2020	11	10	Bacteria	32	Proteobacteria	Gammaproteobacteria	Xanthomonadales	Xanthomonadaceae	Lysobacter
Hu 2020	1	11	Bacteria	32	Proteobacteria	Alphaproteobacteria	Sphingomonadales	Sphingomonadaceae	Sphingosinicella
Hu 2020	9	11	Bacteria	32	Proteobacteria	Alphaproteobacteria	Sphingomonadales	Sphingomonadaceae	Sphingobium
Hu 2020	10	11	Bacteria	32	Proteobacteria	Alphaproteobacteria	Sphingomonadales	Sphingomonadaceae	Sphingopyxis
Hu 2020	3	11	Bacteria	32	Proteobacteria	Gammaproteobacteria	Xanthomonadales	Xanthomonadaceae	Arenimonas
Hu 2020	11	11	Bacteria	32	Proteobacteria	Gammaproteobacteria	Xanthomonadales	Xanthomonadaceae	Lysobacter
Hu 2020	12	11	Bacteria	32	Proteobacteria	Gammaproteobacteria	Xanthomonadales	Xanthomonadaceae	Arenimonas
Hu 2020	9	12	Bacteria	32	Proteobacteria	Alphaproteobacteria	Sphingomonadales	Sphingomonadaceae	Sphingobium
Hu 2020	1	12	Bacteria	32	Proteobacteria	Gammaproteobacteria	Xanthomonadales	Xanthomonadaceae	Arenimonas
Hu 2020	3	12	Bacteria	32	Proteobacteria	Gammaproteobacteria	Xanthomonadales	Xanthomonadaceae	Lysobacter
Hu 2020	10	12	Bacteria	32	Proteobacteria	Gammaproteobacteria	Xanthomonadales	Xanthomonadaceae	Arenimonas
Hu 2020	11	12	Bacteria	32	Proteobacteria	Gammaproteobacteria	Xanthomonadales	Xanthomonadaceae	Lysobacter
Hu 2020	12	12	Bacteria	32	Proteobacteria	Gammaproteobacteria	Xanthomonadales	Xanthomonadaceae	Arenimonas
Hu 2020	9	13	Bacteria	32	Proteobacteria	Alphaproteobacteria	Sphingomonadales	Sphingomonadaceae	Sphingobium
Hu 2020	1	13	Bacteria	32	Proteobacteria	Gammaproteobacteria	Xanthomonadales	Xanthomonadaceae	Lysobacter
Hu 2020	3	13	Bacteria	32	Proteobacteria	Gammaproteobacteria	Xanthomonadales	Xanthomonadaceae	Lysobacter
Hu 2020	10	13	Bacteria	32	Proteobacteria	Gammaproteobacteria	Xanthomonadales	Xanthomonadaceae	Luteimonas
Hu 2020	11	13	Bacteria	32	Proteobacteria	Gammaproteobacteria	Xanthomonadales	Xanthomonadaceae	Lysobacter
Hu 2020	12	13	Bacteria	32	Proteobacteria	Gammaproteobacteria	Xanthomonadales	Xanthomonadaceae	Arenimonas
Hu 2020	9	14	Bacteria	32	Proteobacteria	Alphaproteobacteria	Sphingomonadales	Sphingomonadaceae	Sphingobium
Hu 2020	1	14	Bacteria	32	Proteobacteria	Gammaproteobacteria	Xanthomonadales	Xanthomonadaceae	Lysobacter
Hu 2020	3	14	Bacteria	32	Proteobacteria	Gammaproteobacteria	Xanthomonadales	Xanthomonadaceae	Lysobacter
Hu 2020	10	14	Bacteria	32	Proteobacteria	Gammaproteobacteria	Xanthomonadales	Xanthomonadaceae	Pseudoxanthomonas
Hu 2020	11	14	Bacteria	32	Proteobacteria	Gammaproteobacteria	Xanthomonadales	Xanthomonadaceae	Rehaibacterium
Hu 2020	12	14	Bacteria	32	Proteobacteria	Gammaproteobacteria	Xanthomonadales	Xanthomonadaceae	Lysobacter
Hu 2020	9	15	Bacteria	32	Proteobacteria	Alphaproteobacteria	Sphingomonadales	Sphingomonadaceae	Sphingobium
Hu 2020	1	15	Bacteria	32	Proteobacteria	Gammaproteobacteria	Xanthomonadales	Xanthomonadaceae	Lysobacter
Hu 2020	3	15	Bacteria	32	Proteobacteria	Gammaproteobacteria	Xanthomonadales	Xanthomonadaceae	Lysobacter
Hu 2020	10	15	Bacteria	32	Proteobacteria	Gammaproteobacteria	Xanthomonadales	Xanthomonadaceae	Pseudoxanthomonas
Hu 2020	11	15	Bacteria	32	Proteobacteria	Gammaproteobacteria	Xanthomonadales	Xanthomonadaceae	Pseudoxanthomonas
Hu 2020	12	15	Bacteria	32	Proteobacteria	Gammaproteobacteria	Xanthomonadales	Xanthomonadaceae	Pseudoxanthomonas
Hu 2020	6	16	Bacteria	32	Proteobacteria	Alphaproteobacteria	Sphingomonadales	Sphingomonadaceae	Sphingobium
Hu 2020	9	16	Bacteria	32	Proteobacteria	Alphaproteobacteria	Sphingomonadales	Sphingomonadaceae	Sphingobium
Hu 2020	1	16	Bacteria	32	Proteobacteria	Gammaproteobacteria	Xanthomonadales	Xanthomonadaceae	Lysobacter
Hu 2020	2	16	Bacteria	32	Proteobacteria	Gammaproteobacteria	Xanthomonadales	Xanthomonadaceae	Arenimonas
Hu 2020	3	16	Bacteria	32	Proteobacteria	Gammaproteobacteria	Xanthomonadales	Xanthomonadaceae	Lysobacter
Hu 2020	10	16	Bacteria	32	Proteobacteria	Gammaproteobacteria	Xanthomonadales	Xanthomonadaceae	Pseudoxanthomonas
Hu 2020	11	16	Bacteria	32	Proteobacteria	Gammaproteobacteria	Xanthomonadales	Xanthomonadaceae	Pseudoxanthomonas
Hu 2020	12	16	Bacteria	32	Proteobacteria	Gammaproteobacteria	Xanthomonadales	Xanthomonadaceae	Pseudoxanthomonas
Hu 2020	6	17	Bacteria	32	Proteobacteria	Alphaproteobacteria	Sphingomonadales	Sphingomonadaceae	Sphingobium
Hu 2020	9	17	Bacteria	32	Proteobacteria	Alphaproteobacteria	Sphingomonadales	Sphingomonadaceae	Sphingobium
Hu 2020	1	17	Bacteria	32	Proteobacteria	Gammaproteobacteria	Xanthomonadales	Xanthomonadaceae	Lysobacter
Hu 2020	2	17	Bacteria	32	Proteobacteria	Gammaproteobacteria	Xanthomonadales	Xanthomonadaceae	Arenimonas
Hu 2020	3	17	Bacteria	32	Proteobacteria	Gammaproteobacteria	Xanthomonadales	Xanthomonadaceae	Lysobacter
Hu 2020	10	17	Bacteria	32	Proteobacteria	Gammaproteobacteria	Xanthomonadales	Xanthomonadaceae	Pseudoxanthomonas
Hu 2020	11	17	Bacteria	32	Proteobacteria	Gammaproteobacteria	Xanthomonadales	Xanthomonadaceae	Pseudoxanthomonas
Hu 2020	12	17	Bacteria	32	Proteobacteria	Gammaproteobacteria	Xanthomonadales	Xanthomonadaceae	Pseudoxanthomonas
Hu 2020	5	18	Bacteria	32	Proteobacteria	Alphaproteobacteria	Sphingomonadales	Sphingomonadaceae	Sphingobium
Hu 2020	6	18	Bacteria	32	Proteobacteria	Alphaproteobacteria	Sphingomonadales	Sphingomonadaceae	Sphingobium
Hu 2020	9	18	Bacteria	32	Proteobacteria	Alphaproteobacteria	Sphingomonadales	Sphingomonadaceae	Sphingobium
Hu 2020	1	18	Bacteria	32	Proteobacteria	Gammaproteobacteria	Xanthomonadales	Xanthomonadaceae	Lysobacter
Hu 2020	2	18	Bacteria	32	Proteobacteria	Gammaproteobacteria	Xanthomonadales	Xanthomonadaceae	Pseudoxanthomonas
Hu 2020	3	18	Bacteria	32	Proteobacteria	Gammaproteobacteria	Xanthomonadales	Xanthomonadaceae	Lysobacter
Hu 2020	10	18	Bacteria	32	Proteobacteria	Gammaproteobacteria	Xanthomonadales	Xanthomonadaceae	Pseudoxanthomonas
Hu 2020	11	18	Bacteria	32	Proteobacteria	Gammaproteobacteria	Xanthomonadales	Xanthomonadaceae	Pseudoxanthomonas
Hu 2020	12	18	Bacteria	32	Proteobacteria	Gammaproteobacteria	Xanthomonadales	Xanthomonadaceae	Pseudoxanthomonas
Hu 2020	5	19	Bacteria	32	Proteobacteria	Alphaproteobacteria	Sphingomonadales	Sphingomonadaceae	Sphingobium
Hu 2020	6	19	Bacteria	32	Proteobacteria	Alphaproteobacteria	Sphingomonadales	Sphingomonadaceae	Sphingobium
Hu 2020	9	19	Bacteria	32	Proteobacteria	Alphaproteobacteria	Sphingomonadales	Sphingomonadaceae	Sphingobium
Hu 2020	1	19	Bacteria	32	Proteobacteria	Gammaproteobacteria	Xanthomonadales	Xanthomonadaceae	Lysobacter
Hu 2020	2	19	Bacteria	32	Proteobacteria	Gammaproteobacteria	Xanthomonadales	Xanthomonadaceae	Lysobacter
Hu 2020	3	19	Bacteria	32	Proteobacteria	Gammaproteobacteria	Xanthomonadales	Xanthomonadaceae	Lysobacter
Hu 2020	10	19	Bacteria	32	Proteobacteria	Gammaproteobacteria	Xanthomonadales	Xanthomonadaceae	Pseudoxanthomonas
Hu 2020	11	19	Bacteria	32	Proteobacteria	Gammaproteobacteria	Xanthomonadales	Xanthomonadaceae	Pseudoxanthomonas
Hu 2020	12	19	Bacteria	32	Proteobacteria	Gammaproteobacteria	Xanthomonadales	Xanthomonadaceae	Pseudoxanthomonas
Hu 2020	5	20	Bacteria	32	Proteobacteria	Alphaproteobacteria	Sphingomonadales	Sphingomonadaceae	Sphingopyxis
Hu 2020	6	20	Bacteria	32	Proteobacteria	Alphaproteobacteria	Sphingomonadales	Sphingomonadaceae	Sphingobium
Hu 2020	9	20	Bacteria	32	Proteobacteria	Alphaproteobacteria	Sphingomonadales	Sphingomonadaceae	Sphingobium
Hu 2020	1	20	Bacteria	32	Proteobacteria	Gammaproteobacteria	Xanthomonadales	Xanthomonadaceae	Pseudoxanthomonas
Hu 2020	2	20	Bacteria	32	Proteobacteria	Gammaproteobacteria	Xanthomonadales	Xanthomonadaceae	Lysobacter
Hu 2020	3	20	Bacteria	32	Proteobacteria	Gammaproteobacteria	Xanthomonadales	Xanthomonadaceae	Pseudoxanthomonas
Hu 2020	10	20	Bacteria	32	Proteobacteria	Gammaproteobacteria	Xanthomonadales	Xanthomonadaceae	Pseudoxanthomonas
Hu 2020	11	20	Bacteria	32	Proteobacteria	Gammaproteobacteria	Xanthomonadales	Xanthomonadaceae	Pseudoxanthomonas
Hu 2020	12	20	Bacteria	32	Proteobacteria	Gammaproteobacteria	Xanthomonadales	Xanthomonadaceae	Pseudoxanthomonas
Hu 2020	4	21	Bacteria	32	Proteobacteria	Alphaproteobacteria	Caulobacterales	Caulobacteraceae	Brevundimonas
Hu 2020	5	21	Bacteria	32	Proteobacteria	Alphaproteobacteria	Sphingomonadales	Sphingomonadaceae	Sphingopyxis
Hu 2020	6	21	Bacteria	32	Proteobacteria	Alphaproteobacteria	Sphingomonadales	Sphingomonadaceae	Sphingopyxis
Hu 2020	9	21	Bacteria	32	Proteobacteria	Alphaproteobacteria	Sphingomonadales	Sphingomonadaceae	Sphingobium
Hu 2020	1	21	Bacteria	32	Proteobacteria	Gammaproteobacteria	Xanthomonadales	Xanthomonadaceae	Luteimonas
Hu 2020	3	21	Bacteria	32	Proteobacteria	Gammaproteobacteria	Xanthomonadales	Xanthomonadaceae	Rehaibacterium
Hu 2020	10	21	Bacteria	32	Proteobacteria	Gammaproteobacteria	Xanthomonadales	Xanthomonadaceae	Pseudoxanthomonas
Hu 2020	11	21	Bacteria	32	Proteobacteria	Gammaproteobacteria	Xanthomonadales	Xanthomonadaceae	Pseudoxanthomonas
Hu 2020	12	21	Bacteria	32	Proteobacteria	Gammaproteobacteria	Xanthomonadales	Xanthomonadaceae	Pseudoxanthomonas
Hu 2020	4	22	Bacteria	32	Proteobacteria	Alphaproteobacteria	Rhizobiales	Rhizobiaceae	Ciceribacter
Hu 2020	8	22	Bacteria	32	Proteobacteria	Alphaproteobacteria	Sphingomonadales	Sphingomonadaceae	Sphingobium
Hu 2020	9	22	Bacteria	32	Proteobacteria	Alphaproteobacteria	Sphingomonadales	Sphingomonadaceae	Sphingobium
Hu 2020	1	22	Bacteria	32	Proteobacteria	Gammaproteobacteria	Xanthomonadales	Xanthomonadaceae	Luteimonas
Hu 2020	5	22	Bacteria	32	Proteobacteria	Gammaproteobacteria	Xanthomonadales	Xanthomonadaceae	Aspromonas
Hu 2020	6	22	Bacteria	32	Proteobacteria	Gammaproteobacteria	Xanthomonadales	Xanthomonadaceae	Luteimonas
Hu 2020	10	22	Bacteria	32	Proteobacteria	Gammaproteobacteria	Xanthomonadales	Xanthomonadaceae	Pseudoxanthomonas
Hu 2020	11	22	Bacteria	32	Proteobacteria	Gammaproteobacteria	Xanthomonadales	Xanthomonadaceae	Pseudoxanthomonas
Hu 2020	12	22	Bacteria	32	Proteobacteria	Gammaproteobacteria	Xanthomonadales	Xanthomonadaceae	Pseudoxanthomonas
Hu 2020	4	23	Bacteria	32	Proteobacteria	Alphaproteobacteria	Sphingomonadales	Sphingomonadaceae	Sphingobium
Hu 2020	8	23	Bacteria	32	Proteobacteria	Alphaproteobacteria	Sphingomonadales	Sphingomonadaceae	Sphingobium
Hu 2020	9	23	Bacteria	32	Proteobacteria	Alphaproteobacteria	Sphingomonadales	Sphingomonadaceae	Sphingobium
Hu 2020	1	23	Bacteria	32	Proteobacteria	Gammaproteobacteria	Xanthomonadales	Xanthomonadaceae	Arenimonas
Hu 2020	5	23	Bacteria	32	Proteobacteria	Gammaproteobacteria	Xanthomonadales	Xanthomonadaceae	Pseudoxanthomonas
Hu 2020	6	23	Bacteria	32	Proteobacteria	Gammaproteobacteria	Xanthomonadales	Xanthomonadaceae	Lysobacter
Hu 2020	10	23	Bacteria	32	Proteobacteria	Gammaproteobacteria	Xanthomonadales	Xanthomonadaceae	Pseudoxanthomonas
Hu 2020	11	23	Bacteria	32	Proteobacteria	Gammaproteobacteria	Xanthomonadales	Xanthomonadaceae	Pseudoxanthomonas
Hu 2020	12	23	Bacteria	32	Proteobacteria	Gammaproteobacteria	Xanthomonadales	Xanthomonadaceae	Pseudoxanthomonas
Hu 2020	9	24	Bacteria	32	Proteobacteria	Betaproteobacteria	Burkholderiales	Comamonadaceae	Schlegelella
Hu 2020	4	24	Bacteria	32	Proteobacteria	Alphaproteobacteria	Sphingomonadales	Sphingomonadaceae	Sphingobium
Hu 2020	8	24	Bacteria	32	Proteobacteria	Alphaproteobacteria	Sphingomonadales	Sphingomonadaceae	Sphingobium
Hu 2020	1	24	Bacteria	32	Proteobacteria	Gammaproteobacteria	Xanthomonadales	Xanthomonadaceae	Rehaibacterium
Hu 2020	5	24	Bacteria	32	Proteobacteria	Gammaproteobacteria	Xanthomonadales	Xanthomonadaceae	Pseudoxanthomonas
Hu 2020	6	24	Bacteria	32	Proteobacteria	Gammaproteobacteria	Xanthomonadales	Xanthomonadaceae	Lysobacter
Hu 2020	10	24	Bacteria	32	Proteobacteria	Gammaproteobacteria	Xanthomonadales	Xanthomonadaceae	Pseudoxanthomonas
Hu 2020	11	24	Bacteria	32	Proteobacteria	Gammaproteobacteria	Xanthomonadales	Xanthomonadaceae	Pseudoxanthomonas
Hu 2020	12	24	Bacteria	32	Proteobacteria	Gammaproteobacteria	Xanthomonadales	Xanthomonadaceae	Pseudoxanthomonas
Hu 2020	4	25	Bacteria	32	Proteobacteria	Alphaproteobacteria	Sphingomonadales	Sphingomonadaceae	Sphingopyxis
Hu 2020	7	25	Bacteria	32	Proteobacteria	Alphaproteobacteria	Sphingomonadales	Sphingomonadaceae	Sphingobium
Hu 2020	8	25	Bacteria	32	Proteobacteria	Alphaproteobacteria	Sphingomonadales	Sphingomonadaceae	Sphingobium
Hu 2020	5	25	Bacteria	32	Proteobacteria	Gammaproteobacteria	Xanthomonadales	Xanthomonadaceae	Pseudoxanthomonas
Hu 2020	6	25	Bacteria	32	Proteobacteria	Gammaproteobacteria	Xanthomonadales	Xanthomonadaceae	Pseudoxanthomonas
Hu 2020	9	25	Bacteria	32	Proteobacteria	Gammaproteobacteria	Xanthomonadales	Xanthomonadaceae	Lysobacter
Hu 2020	10	25	Bacteria	32	Proteobacteria	Gammaproteobacteria	Xanthomonadales	Xanthomonadaceae	Pseudoxanthomonas
Hu 2020	11	25	Bacteria	32	Proteobacteria	Gammaproteobacteria	Xanthomonadales	Xanthomonadaceae	Pseudoxanthomonas
Hu 2020	12	25	Bacteria	32	Proteobacteria	Gammaproteobacteria	Xanthomonadales	Xanthomonadaceae	Pseudoxanthomonas
Hu 2020	8	26	Bacteria	32	Proteobacteria	Alphaproteobacteria	Sphingomonadales	Sphingomonadaceae	Sphingobium
Hu 2020	4	26	Bacteria	32	Proteobacteria	Gammaproteobacteria	Xanthomonadales	Xanthomonadaceae	Pseudoxanthomonas
Hu 2020	5	26	Bacteria	32	Proteobacteria	Gammaproteobacteria	Xanthomonadales	Xanthomonadaceae	Rehaibacterium
Hu 2020	6	26	Bacteria	32	Proteobacteria	Gammaproteobacteria	Xanthomonadales	Xanthomonadaceae	Pseudoxanthomonas
Hu 2020	7	26	Bacteria	32	Proteobacteria	Gammaproteobacteria	Xanthomonadales	Xanthomonadaceae	Lysobacter
Hu 2020	9	26	Bacteria	32	Proteobacteria	Gammaproteobacteria	Xanthomonadales	Xanthomonadaceae	Lysobacter
Hu 2020	10	26	Bacteria	32	Proteobacteria	Gammaproteobacteria	Xanthomonadales	Xanthomonadaceae	Pseudoxanthomonas
Hu 2020	11	26	Bacteria	32	Proteobacteria	Gammaproteobacteria	Xanthomonadales	Xanthomonadaceae	Pseudoxanthomonas
Hu 2020	12	26	Bacteria	32	Proteobacteria	Gammaproteobacteria	Xanthomonadales	Xanthomonadaceae	Pseudoxanthomonas
Hu 2020	8	27	Bacteria	32	Proteobacteria	Alphaproteobacteria	Sphingomonadales	Sphingomonadaceae	Sphingobium
Hu 2020	4	27	Bacteria	32	Proteobacteria	Gammaproteobacteria	Xanthomonadales	Xanthomonadaceae	Pseudoxanthomonas
Hu 2020	5	27	Bacteria	32	Proteobacteria	Gammaproteobacteria	Xanthomonadales	Xanthomonadaceae	Thermomonas
Hu 2020	6	27	Bacteria	32	Proteobacteria	Gammaproteobacteria	Xanthomonadales	Xanthomonadaceae	Pseudoxanthomonas
Hu 2020	7	27	Bacteria	32	Proteobacteria	Gammaproteobacteria	Xanthomonadales	Xanthomonadaceae	Lysobacter
Hu 2020	9	27	Bacteria	32	Proteobacteria	Gammaproteobacteria	Xanthomonadales	Xanthomonadaceae	Pseudoxanthomonas
Hu 2020	10	27	Bacteria	32	Proteobacteria	Gammaproteobacteria	Xanthomonadales	Xanthomonadaceae	Pseudoxanthomonas
Hu 2020	11	27	Bacteria	32	Proteobacteria	Gammaproteobacteria	Xanthomonadales	Xanthomonadaceae	Pseudoxanthomonas
Hu 2020	12	27	Bacteria	32	Proteobacteria	Gammaproteobacteria	Xanthomonadales	Xanthomonadaceae	Pseudoxanthomonas
Hu 2020	8	28	Bacteria	32	Proteobacteria	Alphaproteobacteria	Sneathiellales	Sneathiellaceae	Ferrovibrio
Hu 2020	4	28	Bacteria	32	Proteobacteria	Gammaproteobacteria	Xanthomonadales	Xanthomonadaceae	Pseudoxanthomonas
Hu 2020	5	28	Bacteria	32	Proteobacteria	Gammaproteobacteria	Xanthomonadales	Xanthomonadaceae	Thermomonas
Hu 2020	6	28	Bacteria	32	Proteobacteria	Gammaproteobacteria	Xanthomonadales	Xanthomonadaceae	Pseudoxanthomonas
Hu 2020	7	28	Bacteria	32	Proteobacteria	Gammaproteobacteria	Xanthomonadales	Xanthomonadaceae	Pseudoxanthomonas
Hu 2020	9	28	Bacteria	32	Proteobacteria	Gammaproteobacteria	Xanthomonadales	Xanthomonadaceae	Pseudoxanthomonas
Hu 2020	10	28	Bacteria	32	Proteobacteria	Gammaproteobacteria	Xanthomonadales	Xanthomonadaceae	Pseudoxanthomonas
Hu 2020	11	28	Bacteria	32	Proteobacteria	Gammaproteobacteria	Xanthomonadales	Xanthomonadaceae	Pseudoxanthomonas
Hu 2020	12	28	Bacteria	32	Proteobacteria	Gammaproteobacteria	Xanthomonadales	Xanthomonadaceae	Pseudoxanthomonas
Hu 2020	4	29	Bacteria	32	Proteobacteria	Gammaproteobacteria	Xanthomonadales	Xanthomonadaceae	Xylella
Hu 2020	6	29	Bacteria	32	Proteobacteria	Gammaproteobacteria	Xanthomonadales	Xanthomonadaceae	Pseudoxanthomonas
Hu 2020	8	29	Bacteria	32	Proteobacteria	Gammaproteobacteria	Xanthomonadales	Xanthomonadaceae	Aspromonas
Hu 2020	9	29	Bacteria	32	Proteobacteria	Gammaproteobacteria	Xanthomonadales	Xanthomonadaceae	Pseudoxanthomonas
Hu 2020	11	29	Bacteria	32	Proteobacteria	Gammaproteobacteria	Xanthomonadales	Xanthomonadaceae	Pseudoxanthomonas
Hu 2020	12	29	Bacteria	32	Proteobacteria	Gammaproteobacteria	Xanthomonadales	Xanthomonadaceae	Pseudoxanthomonas
Hu 2020	6	30	Bacteria	32	Proteobacteria	Gammaproteobacteria	Xanthomonadales	Xanthomonadaceae	Pseudoxanthomonas
Hu 2020	8	30	Bacteria	32	Proteobacteria	Gammaproteobacteria	Xanthomonadales	Xanthomonadaceae	Pseudoxanthomonas
Hu 2020	9	30	Bacteria	32	Proteobacteria	Gammaproteobacteria	Xanthomonadales	Xanthomonadaceae	Pseudoxanthomonas
Hu 2020	11	30	Bacteria	32	Proteobacteria	Gammaproteobacteria	Xanthomonadales	Xanthomonadaceae	Pseudoxanthomonas
Hu 2020	6	31	Bacteria	32	Proteobacteria	Gammaproteobacteria	Xanthomonadales	Xanthomonadaceae	Pseudoxanthomonas
Hu 2020	8	31	Bacteria	32	Proteobacteria	Gammaproteobacteria	Xanthomonadales	Xanthomonadaceae	Pseudoxanthomonas
Hu 2020	11	31	Bacteria	32	Proteobacteria	Gammaproteobacteria	Xanthomonadales	Xanthomonadaceae	Pseudoxanthomonas
Hu 2020	11	32	Bacteria	32	Proteobacteria	Gammaproteobacteria	Xanthomonadales	Xanthomonadaceae	Pseudoxanthomonas
Castrillo 2017	1	22	Bacteria	35	Proteobacteria	Alphaproteobacteria	Caulobacterales	Caulobacteraceae	Brevundimonas		374
Castrillo 2017	1	23	Bacteria	35	Proteobacteria	Alphaproteobacteria	Rhizobiales	Brucellaceae	Ochrobactrum		370MFChir3.1
Castrillo 2017	1	24	Bacteria	35	Proteobacteria	Alphaproteobacteria	Rhizobiales	Phyllobacteriaceae	Phyllobacterium		UNC302MFCol5.2
Castrillo 2017	1	25	Bacteria	35	Proteobacteria	Alphaproteobacteria	Rhizobiales	Rhizobiaceae	Agrobacterium		33MFTa1.1
Castrillo 2017	1	26	Bacteria	35	Proteobacteria	Alphaproteobacteria	Rhizobiales	Rhizobiaceae	Rhizobium		2MFCol3.1
Castrillo 2017	1	27	Bacteria	35	Proteobacteria	Betaproteobacteria	Burkholderiales	Burkholderiaceae	Burkholderia	bryophila	376MFSha3.1
Castrillo 2017	1	28	Bacteria	35	Proteobacteria	Betaproteobacteria	Burkholderiales	Burkholderiaceae	Ralstonia		UNC404CL21Col
Castrillo 2017	1	29	Bacteria	35	Proteobacteria	Betaproteobacteria	Burkholderiales	Comamonadaceae	Polaromonas		JS666_UNC47MFTsu3.1
Castrillo 2017	1	30	Bacteria	35	Proteobacteria	Betaproteobacteria	Burkholderiales	Comamonadaceae	Variovorax	paradoxus	CL14
Castrillo 2017	1	31	Bacteria	35	Proteobacteria	Gammaproteobacteria	Enterobacteriales	Enterobacteriaceae	Escherichia
Castrillo 2017	1	32	Bacteria	35	Proteobacteria	Gammaproteobacteria	Pseudomonadales	Moraxellaceae	Acinetobacter		UNC434CL69Tsu2S25
Castrillo 2017	1	33	Bacteria	35	Proteobacteria	Gammaproteobacteria	Pseudomonadales	Pseudomonadaceae	Pseudomonas		KD5
Castrillo 2017	1	34	Bacteria	35	Proteobacteria	Gammaproteobacteria	Xanthomonadales	Xanthomonadaceae	Dyella	japonica	UNC79MFTsu3.2
Castrillo 2017	1	35	Bacteria	35	Proteobacteria	Gammaproteobacteria	Xanthomonadales	Xanthomonadaceae	Luteibacter		UNC138MFCol5.1
Lebeis 2015	1	25	Bacteria	38	Proteobacteria	Alphaproteobacteria	Caulobacterales	Caulobacteraceae	Caulobacter
Lebeis 2015	1	26	Bacteria	38	Proteobacteria	Alphaproteobacteria	Rhizobiales	Bradyrhizobiaceae	Bosea
Lebeis 2015	1	27	Bacteria	38	Proteobacteria	Alphaproteobacteria	Rhizobiales	Methylobacteriaceae	Methylobacterium
Lebeis 2015	1	28	Bacteria	38	Proteobacteria	Alphaproteobacteria	Rhizobiales	Phyllobacteriaceae	Phyllobacterium
Lebeis 2015	1	29	Bacteria	38	Proteobacteria	Alphaproteobacteria	Rhizobiales	Rhizobiaceae	Agrobacterium
Lebeis 2015	1	30	Bacteria	38	Proteobacteria	Alphaproteobacteria	Rhizobiales	Rhizobiaceae	Rhizobium
Lebeis 2015	1	31	Bacteria	38	Proteobacteria	Betaproteobacteria	Burkholderiales	Burkholderiaceae	Burkholderia
Lebeis 2015	1	32	Bacteria	38	Proteobacteria	Betaproteobacteria	Burkholderiales	Burkholderiaceae
Lebeis 2015	1	33	Bacteria	38	Proteobacteria	Betaproteobacteria	Burkholderiales	Comamonadaceae	Variovorax	paradoxus
Lebeis 2015	1	34	Bacteria	38	Proteobacteria	Betaproteobacteria	Burkholderiales	Ralstoniaceae	Ralstonia	mannitolilytica
Lebeis 2015	1	35	Bacteria	38	Proteobacteria	Gammaproteobacteria	Enterobacterales	Enterobacteriaceae	Esherichia	coli
Lebeis 2015	1	36	Bacteria	38	Proteobacteria	Gammaproteobacteria	Pseudomonadales	Moraxellaceae
Lebeis 2015	1	37	Bacteria	38	Proteobacteria	Gammaproteobacteria	Pseudomonadales	Pseudomonadaceae	Pseudomonas
Lebeis 2015	1	38	Bacteria	38	Proteobacteria	Gammaproteobacteria	Xanthomonadales	Xanthomonadaceae	Dyella	marensis
Hartman 2017	1	3	Bacteria	84	Proteobacteria	Betaproteobacteria	Burkholderiales	Oxalobacteraceae	Janthinobacterium	lividum
Hartman 2017	1	4	Bacteria	84	Proteobacteria	Gammaproteobacteria	Pseudomonadales	Pseudomonadaceae	Pseudomonas
Herrera Paredes 2018	1	47	Bacteria	84	Proteobacteria	Alphaproteobacteria	Caulobacterales	Caulobacteraceae	Brevundimonas		CL04Tsu
Herrera Paredes 2018	1	48	Bacteria	84	Proteobacteria	Alphaproteobacteria	Rhizobiales	Brucellaceae	Falsochrobactrum
Herrera Paredes 2018	1	49	Bacteria	84	Proteobacteria	Alphaproteobacteria	Rhizobiales	Brucellaceae	Ochrobactrum		370MFChir3.1
Herrera Paredes 2018	1	50	Bacteria	84	Proteobacteria	Alphaproteobacteria	Rhizobiales	Methylobacteriaceae	Methylobacterium	brachiatum	111MFTsu3.1M4
Herrera Paredes 2018	1	51	Bacteria	84	Proteobacteria	Alphaproteobacteria	Rhizobiales	Methylobacteriaceae	Methylobacterium		13MFTsu3.1M2
Herrera Paredes 2018	1	52	Bacteria	84	Proteobacteria	Alphaproteobacteria	Rhizobiales	Methylobacteriaceae	Methylobacterium		275MFSha3.1
Herrera Paredes 2018	1	53	Bacteria	84	Proteobacteria	Alphaproteobacteria	Rhizobiales	Phyllobacteriaceae	Phyllobacterium
Herrera Paredes 2018	1	54	Bacteria	84	Proteobacteria	Alphaproteobacteria	Rhizobiales	Rhizobiaceae	Agrobacterium	tumefaciens	233MFSha2.1
Herrera Paredes 2018	1	55	Bacteria	84	Proteobacteria	Alphaproteobacteria	Rhizobiales	Rhizobiaceae	Agrobacterium	tumefaciens	CL32Tsu
Herrera Paredes 2018	1	56	Bacteria	84	Proteobacteria	Alphaproteobacteria	Rhizobiales	Rhizobiaceae	Agrobacterium		10MFCol1.1
Herrera Paredes 2018	1	57	Bacteria	84	Proteobacteria	Alphaproteobacteria	Rhizobiales	Rhizobiaceae	Agrobacterium		224MFTsu3.1
Herrera Paredes 2018	1	58	Bacteria	84	Proteobacteria	Alphaproteobacteria	Rhizobiales	Rhizobiaceae	Agrobacterium		33MFTa1.1
Herrera Paredes 2018	1	59	Bacteria	84	Proteobacteria	Alphaproteobacteria	Rhizobiales	Rhizobiaceae	Ciceribacter
Herrera Paredes 2018	1	60	Bacteria	84	Proteobacteria	Alphaproteobacteria	Rhizobiales	Rhizobiaceae	Ensifer
Herrera Paredes 2018	1	61	Bacteria	84	Proteobacteria	Alphaproteobacteria	Rhizobiales	Rhizobiaceae	Rhizobium		28MFCol1.1
Herrera Paredes 2018	1	62	Bacteria	84	Proteobacteria	Alphaproteobacteria	Rhizobiales	Rhizobiaceae	Rhizobium		IBUN
Herrera Paredes 2018	1	63	Bacteria	84	Proteobacteria	Alphaproteobacteria	Sphingomonadales	Sphingomonadaceae	Sphingomonas
Herrera Paredes 2018	1	64	Bacteria	84	Proteobacteria	Alphaproteobacteria	Sphingomonadales	Sphingomonadaceae	Sphingomonas
Herrera Paredes 2018	1	65	Bacteria	84	Proteobacteria	Betaproteobacteria	Burkholderiales	Burkholderiaceae	Burkholderia	bryophila	376MFSha3.1
Herrera Paredes 2018	1	66	Bacteria	84	Proteobacteria	Betaproteobacteria	Burkholderiales	Burkholderiaceae	Burkholderia		CL11
Herrera Paredes 2018	1	67	Bacteria	84	Proteobacteria	Betaproteobacteria	Burkholderiales	Burkholderiaceae	Burkholderia		MF384
Herrera Paredes 2018	1	68	Bacteria	84	Proteobacteria	Betaproteobacteria	Burkholderiales	Burkholderiaceae	Ralstonia		UNC404CL21Col
Herrera Paredes 2018	1	69	Bacteria	84	Proteobacteria	Betaproteobacteria	Burkholderiales	Comamonadaceae	Variovorax	paradoxus	295MFChir4.1
Herrera Paredes 2018	1	70	Bacteria	84	Proteobacteria	Betaproteobacteria	Burkholderiales	Comamonadaceae	Variovorax		278MFTsu5.1
Herrera Paredes 2018	1	71	Bacteria	84	Proteobacteria	Betaproteobacteria	Burkholderiales	Comamonadaceae	Variovorax		350MFTsu5.1
Herrera Paredes 2018	1	72	Bacteria	84	Proteobacteria	Betaproteobacteria	Burkholderiales	Comamonadaceae	Variovorax		375MFSha3.1
Herrera Paredes 2018	1	73	Bacteria	84	Proteobacteria	Betaproteobacteria	Burkholderiales	Comamonadaceae	Variovorax
Herrera Paredes 2018	1	74	Bacteria	84	Proteobacteria	Betaproteobacteria	Burkholderiales	Comamonadaceae	Variovorax
Herrera Paredes 2018	1	75	Bacteria	84	Proteobacteria	Betaproteobacteria	Burkholderiales	Comamonadaceae	Variovorax
Herrera Paredes 2018	1	76	Bacteria	84	Proteobacteria	Gammaproteobacteria	Pseudomonadales	Moraxellaceae	Acinetobacter
Herrera Paredes 2018	1	77	Bacteria	84	Proteobacteria	Gammaproteobacteria	Pseudomonadales	Moraxellaceae	Acinetobacter
Herrera Paredes 2018	1	78	Bacteria	84	Proteobacteria	Gammaproteobacteria	Pseudomonadales	Pseudomonadaceae	Pseudomonas	mandelii	36MFCvi1.1
Herrera Paredes 2018	1	79	Bacteria	84	Proteobacteria	Gammaproteobacteria	Pseudomonadales	Pseudomonadaceae	Pseudomonas	umsongensis	20MFCvi1.1
Herrera Paredes 2018	1	80	Bacteria	84	Proteobacteria	Gammaproteobacteria	Pseudomonadales	Pseudomonadaceae	Pseudomonas		113MF
Herrera Paredes 2018	1	81	Bacteria	84	Proteobacteria	Gammaproteobacteria	Pseudomonadales	Pseudomonadaceae	Pseudomonas
Herrera Paredes 2018	1	82	Bacteria	84	Proteobacteria	Gammaproteobacteria	Pseudomonadales	Pseudomonadaceae	Pseudomonas
Herrera Paredes 2018	1	83	Bacteria	84	Proteobacteria	Gammaproteobacteria	Xanthomonadales	Xanthomonadaceae	Luteibacter		329MFSha
Herrera Paredes 2018	1	84	Bacteria	84	Proteobacteria	Gammaproteobacteria	Xanthomonadales	Xanthomonadaceae	Stenotrophomonas
Burghardt 2018	1	1	Bacteria	101	Proteobacteria	Alphaproteobacteria	Rhizobiales	Rhizobiaceae	Ensifer	meliloti	1008
Burghardt 2018	1	2	Bacteria	101	Proteobacteria	Alphaproteobacteria	Rhizobiales	Rhizobiaceae	Ensifer	meliloti	1018
Burghardt 2018	1	3	Bacteria	101	Proteobacteria	Alphaproteobacteria	Rhizobiales	Rhizobiaceae	Ensifer	meliloti	1022
Burghardt 2018	1	4	Bacteria	101	Proteobacteria	Alphaproteobacteria	Rhizobiales	Rhizobiaceae	Ensifer	meliloti	1023
Burghardt 2018	1	5	Bacteria	101	Proteobacteria	Alphaproteobacteria	Rhizobiales	Rhizobiaceae	Ensifer	meliloti	1027
Burghardt 2018	1	6	Bacteria	101	Proteobacteria	Alphaproteobacteria	Rhizobiales	Rhizobiaceae	Ensifer	meliloti	1031
Burghardt 2018	1	7	Bacteria	101	Proteobacteria	Alphaproteobacteria	Rhizobiales	Rhizobiaceae	Ensifer	meliloti	1107
Burghardt 2018	1	8	Bacteria	101	Proteobacteria	Alphaproteobacteria	Rhizobiales	Rhizobiaceae	Ensifer	meliloti	1158
Burghardt 2018	1	9	Bacteria	101	Proteobacteria	Alphaproteobacteria	Rhizobiales	Rhizobiaceae	Ensifer	meliloti	1162
Burghardt 2018	1	10	Bacteria	101	Proteobacteria	Alphaproteobacteria	Rhizobiales	Rhizobiaceae	Ensifer	meliloti	1163
Burghardt 2018	1	11	Bacteria	101	Proteobacteria	Alphaproteobacteria	Rhizobiales	Rhizobiaceae	Ensifer	meliloti	1170
Burghardt 2018	1	12	Bacteria	101	Proteobacteria	Alphaproteobacteria	Rhizobiales	Rhizobiaceae	Ensifer	meliloti	1171
Burghardt 2018	1	13	Bacteria	101	Proteobacteria	Alphaproteobacteria	Rhizobiales	Rhizobiaceae	Ensifer	meliloti	1180
Burghardt 2018	1	14	Bacteria	101	Proteobacteria	Alphaproteobacteria	Rhizobiales	Rhizobiaceae	Ensifer	meliloti	1183
Burghardt 2018	1	15	Bacteria	101	Proteobacteria	Alphaproteobacteria	Rhizobiales	Rhizobiaceae	Ensifer	meliloti	1198
Burghardt 2018	1	16	Bacteria	101	Proteobacteria	Alphaproteobacteria	Rhizobiales	Rhizobiaceae	Ensifer	meliloti	1214
Burghardt 2018	1	17	Bacteria	101	Proteobacteria	Alphaproteobacteria	Rhizobiales	Rhizobiaceae	Ensifer	meliloti	1221
Burghardt 2018	1	18	Bacteria	101	Proteobacteria	Alphaproteobacteria	Rhizobiales	Rhizobiaceae	Ensifer	meliloti	1225
Burghardt 2018	1	19	Bacteria	101	Proteobacteria	Alphaproteobacteria	Rhizobiales	Rhizobiaceae	Ensifer	meliloti	1227
Burghardt 2018	1	20	Bacteria	101	Proteobacteria	Alphaproteobacteria	Rhizobiales	Rhizobiaceae	Ensifer	meliloti	1248
Burghardt 2018	1	21	Bacteria	101	Proteobacteria	Alphaproteobacteria	Rhizobiales	Rhizobiaceae	Ensifer	meliloti	1264
Burghardt 2018	1	22	Bacteria	101	Proteobacteria	Alphaproteobacteria	Rhizobiales	Rhizobiaceae	Ensifer	meliloti	1280
Burghardt 2018	1	23	Bacteria	101	Proteobacteria	Alphaproteobacteria	Rhizobiales	Rhizobiaceae	Ensifer	meliloti	1289
Burghardt 2018	1	24	Bacteria	101	Proteobacteria	Alphaproteobacteria	Rhizobiales	Rhizobiaceae	Ensifer	meliloti	1302
Burghardt 2018	1	25	Bacteria	101	Proteobacteria	Alphaproteobacteria	Rhizobiales	Rhizobiaceae	Ensifer	meliloti	1308
Burghardt 2018	1	26	Bacteria	101	Proteobacteria	Alphaproteobacteria	Rhizobiales	Rhizobiaceae	Ensifer	meliloti	1335
Burghardt 2018	1	27	Bacteria	101	Proteobacteria	Alphaproteobacteria	Rhizobiales	Rhizobiaceae	Ensifer	meliloti	1336
Burghardt 2018	1	28	Bacteria	101	Proteobacteria	Alphaproteobacteria	Rhizobiales	Rhizobiaceae	Ensifer	meliloti	1357
Burghardt 2018	1	29	Bacteria	101	Proteobacteria	Alphaproteobacteria	Rhizobiales	Rhizobiaceae	Ensifer	meliloti	1379
Burghardt 2018	1	30	Bacteria	101	Proteobacteria	Alphaproteobacteria	Rhizobiales	Rhizobiaceae	Ensifer	meliloti	1389
Burghardt 2018	1	31	Bacteria	101	Proteobacteria	Alphaproteobacteria	Rhizobiales	Rhizobiaceae	Ensifer	meliloti	1397
Burghardt 2018	1	32	Bacteria	101	Proteobacteria	Alphaproteobacteria	Rhizobiales	Rhizobiaceae	Ensifer	meliloti	1462
Burghardt 2018	1	33	Bacteria	101	Proteobacteria	Alphaproteobacteria	Rhizobiales	Rhizobiaceae	Ensifer	meliloti	1463
Burghardt 2018	1	34	Bacteria	101	Proteobacteria	Alphaproteobacteria	Rhizobiales	Rhizobiaceae	Ensifer	meliloti	1464
Burghardt 2018	1	35	Bacteria	101	Proteobacteria	Alphaproteobacteria	Rhizobiales	Rhizobiaceae	Ensifer	meliloti	1467
Burghardt 2018	1	36	Bacteria	101	Proteobacteria	Alphaproteobacteria	Rhizobiales	Rhizobiaceae	Ensifer	meliloti	1491
Burghardt 2018	1	37	Bacteria	101	Proteobacteria	Alphaproteobacteria	Rhizobiales	Rhizobiaceae	Ensifer	meliloti	1508
Burghardt 2018	1	38	Bacteria	101	Proteobacteria	Alphaproteobacteria	Rhizobiales	Rhizobiaceae	Ensifer	meliloti	1519
Burghardt 2018	1	39	Bacteria	101	Proteobacteria	Alphaproteobacteria	Rhizobiales	Rhizobiaceae	Ensifer	meliloti	1520
Burghardt 2018	1	40	Bacteria	101	Proteobacteria	Alphaproteobacteria	Rhizobiales	Rhizobiaceae	Ensifer	meliloti	1530
Burghardt 2018	1	41	Bacteria	101	Proteobacteria	Alphaproteobacteria	Rhizobiales	Rhizobiaceae	Ensifer	meliloti	1533
Burghardt 2018	1	42	Bacteria	101	Proteobacteria	Alphaproteobacteria	Rhizobiales	Rhizobiaceae	Ensifer	meliloti	1550
Burghardt 2018	1	43	Bacteria	101	Proteobacteria	Alphaproteobacteria	Rhizobiales	Rhizobiaceae	Ensifer	meliloti	1562
Burghardt 2018	1	44	Bacteria	101	Proteobacteria	Alphaproteobacteria	Rhizobiales	Rhizobiaceae	Ensifer	meliloti	1565
Burghardt 2018	1	45	Bacteria	101	Proteobacteria	Alphaproteobacteria	Rhizobiales	Rhizobiaceae	Ensifer	meliloti	1566
Burghardt 2018	1	46	Bacteria	101	Proteobacteria	Alphaproteobacteria	Rhizobiales	Rhizobiaceae	Ensifer	meliloti	1581
Burghardt 2018	1	47	Bacteria	101	Proteobacteria	Alphaproteobacteria	Rhizobiales	Rhizobiaceae	Ensifer	meliloti	1583
Burghardt 2018	1	48	Bacteria	101	Proteobacteria	Alphaproteobacteria	Rhizobiales	Rhizobiaceae	Ensifer	meliloti	1589
Burghardt 2018	1	49	Bacteria	101	Proteobacteria	Alphaproteobacteria	Rhizobiales	Rhizobiaceae	Ensifer	meliloti	1591
Burghardt 2018	1	50	Bacteria	101	Proteobacteria	Alphaproteobacteria	Rhizobiales	Rhizobiaceae	Ensifer	meliloti	1593
Burghardt 2018	1	51	Bacteria	101	Proteobacteria	Alphaproteobacteria	Rhizobiales	Rhizobiaceae	Ensifer	meliloti	1594
Burghardt 2018	1	52	Bacteria	101	Proteobacteria	Alphaproteobacteria	Rhizobiales	Rhizobiaceae	Ensifer	meliloti	1612
Burghardt 2018	1	53	Bacteria	101	Proteobacteria	Alphaproteobacteria	Rhizobiales	Rhizobiaceae	Ensifer	meliloti	1613
Burghardt 2018	1	54	Bacteria	101	Proteobacteria	Alphaproteobacteria	Rhizobiales	Rhizobiaceae	Ensifer	meliloti	1614
Burghardt 2018	1	55	Bacteria	101	Proteobacteria	Alphaproteobacteria	Rhizobiales	Rhizobiaceae	Ensifer	meliloti	1616
Burghardt 2018	1	56	Bacteria	101	Proteobacteria	Alphaproteobacteria	Rhizobiales	Rhizobiaceae	Ensifer	meliloti	1617
Burghardt 2018	1	57	Bacteria	101	Proteobacteria	Alphaproteobacteria	Rhizobiales	Rhizobiaceae	Ensifer	meliloti	1623
Burghardt 2018	1	58	Bacteria	101	Proteobacteria	Alphaproteobacteria	Rhizobiales	Rhizobiaceae	Ensifer	meliloti	1626
Burghardt 2018	1	59	Bacteria	101	Proteobacteria	Alphaproteobacteria	Rhizobiales	Rhizobiaceae	Ensifer	meliloti	1655
Burghardt 2018	1	60	Bacteria	101	Proteobacteria	Alphaproteobacteria	Rhizobiales	Rhizobiaceae	Ensifer	meliloti	1656
Burghardt 2018	1	61	Bacteria	101	Proteobacteria	Alphaproteobacteria	Rhizobiales	Rhizobiaceae	Ensifer	meliloti	1659
Burghardt 2018	1	62	Bacteria	101	Proteobacteria	Alphaproteobacteria	Rhizobiales	Rhizobiaceae	Ensifer	meliloti	1660
Burghardt 2018	1	63	Bacteria	101	Proteobacteria	Alphaproteobacteria	Rhizobiales	Rhizobiaceae	Ensifer	meliloti	1661
Burghardt 2018	1	64	Bacteria	101	Proteobacteria	Alphaproteobacteria	Rhizobiales	Rhizobiaceae	Ensifer	meliloti	1666
Burghardt 2018	1	65	Bacteria	101	Proteobacteria	Alphaproteobacteria	Rhizobiales	Rhizobiaceae	Ensifer	meliloti	1676
Burghardt 2018	1	66	Bacteria	101	Proteobacteria	Alphaproteobacteria	Rhizobiales	Rhizobiaceae	Ensifer	meliloti	1678
Burghardt 2018	1	67	Bacteria	101	Proteobacteria	Alphaproteobacteria	Rhizobiales	Rhizobiaceae	Ensifer	meliloti	1687
Burghardt 2018	1	68	Bacteria	101	Proteobacteria	Alphaproteobacteria	Rhizobiales	Rhizobiaceae	Ensifer	meliloti	1691
Burghardt 2018	1	69	Bacteria	101	Proteobacteria	Alphaproteobacteria	Rhizobiales	Rhizobiaceae	Ensifer	meliloti	1692
Burghardt 2018	1	70	Bacteria	101	Proteobacteria	Alphaproteobacteria	Rhizobiales	Rhizobiaceae	Ensifer	meliloti	1696
Burghardt 2018	1	71	Bacteria	101	Proteobacteria	Alphaproteobacteria	Rhizobiales	Rhizobiaceae	Ensifer	meliloti	1699
Burghardt 2018	1	72	Bacteria	101	Proteobacteria	Alphaproteobacteria	Rhizobiales	Rhizobiaceae	Ensifer	meliloti	1700
Burghardt 2018	1	73	Bacteria	101	Proteobacteria	Alphaproteobacteria	Rhizobiales	Rhizobiaceae	Ensifer	meliloti	1702
Burghardt 2018	1	74	Bacteria	101	Proteobacteria	Alphaproteobacteria	Rhizobiales	Rhizobiaceae	Ensifer	meliloti	1703
Burghardt 2018	1	75	Bacteria	101	Proteobacteria	Alphaproteobacteria	Rhizobiales	Rhizobiaceae	Ensifer	meliloti	1706
Burghardt 2018	1	76	Bacteria	101	Proteobacteria	Alphaproteobacteria	Rhizobiales	Rhizobiaceae	Ensifer	meliloti	1708
Burghardt 2018	1	77	Bacteria	101	Proteobacteria	Alphaproteobacteria	Rhizobiales	Rhizobiaceae	Ensifer	meliloti	1710
Burghardt 2018	1	78	Bacteria	101	Proteobacteria	Alphaproteobacteria	Rhizobiales	Rhizobiaceae	Ensifer	meliloti	1719
Burghardt 2018	1	79	Bacteria	101	Proteobacteria	Alphaproteobacteria	Rhizobiales	Rhizobiaceae	Ensifer	meliloti	1724
Burghardt 2018	1	80	Bacteria	101	Proteobacteria	Alphaproteobacteria	Rhizobiales	Rhizobiaceae	Ensifer	meliloti	1734
Burghardt 2018	1	81	Bacteria	101	Proteobacteria	Alphaproteobacteria	Rhizobiales	Rhizobiaceae	Ensifer	meliloti	1742
Burghardt 2018	1	82	Bacteria	101	Proteobacteria	Alphaproteobacteria	Rhizobiales	Rhizobiaceae	Ensifer	meliloti	1751
Burghardt 2018	1	83	Bacteria	101	Proteobacteria	Alphaproteobacteria	Rhizobiales	Rhizobiaceae	Ensifer	meliloti	1760
Burghardt 2018	1	84	Bacteria	101	Proteobacteria	Alphaproteobacteria	Rhizobiales	Rhizobiaceae	Ensifer	meliloti	1767
Burghardt 2018	1	85	Bacteria	101	Proteobacteria	Alphaproteobacteria	Rhizobiales	Rhizobiaceae	Ensifer	meliloti	1770
Burghardt 2018	1	86	Bacteria	101	Proteobacteria	Alphaproteobacteria	Rhizobiales	Rhizobiaceae	Ensifer	meliloti	1777
Burghardt 2018	1	87	Bacteria	101	Proteobacteria	Alphaproteobacteria	Rhizobiales	Rhizobiaceae	Ensifer	meliloti	1787
Burghardt 2018	1	88	Bacteria	101	Proteobacteria	Alphaproteobacteria	Rhizobiales	Rhizobiaceae	Ensifer	meliloti	1788
Burghardt 2018	1	89	Bacteria	101	Proteobacteria	Alphaproteobacteria	Rhizobiales	Rhizobiaceae	Ensifer	meliloti	1791
Burghardt 2018	1	90	Bacteria	101	Proteobacteria	Alphaproteobacteria	Rhizobiales	Rhizobiaceae	Ensifer	meliloti	1792
Burghardt 2018	1	91	Bacteria	101	Proteobacteria	Alphaproteobacteria	Rhizobiales	Rhizobiaceae	Ensifer	meliloti	1793
Burghardt 2018	1	92	Bacteria	101	Proteobacteria	Alphaproteobacteria	Rhizobiales	Rhizobiaceae	Ensifer	meliloti	1794
Burghardt 2018	1	93	Bacteria	101	Proteobacteria	Alphaproteobacteria	Rhizobiales	Rhizobiaceae	Ensifer	meliloti	1795
Burghardt 2018	1	94	Bacteria	101	Proteobacteria	Alphaproteobacteria	Rhizobiales	Rhizobiaceae	Ensifer	meliloti	1796
Burghardt 2018	1	95	Bacteria	101	Proteobacteria	Alphaproteobacteria	Rhizobiales	Rhizobiaceae	Ensifer	meliloti	1803
Burghardt 2018	1	96	Bacteria	101	Proteobacteria	Alphaproteobacteria	Rhizobiales	Rhizobiaceae	Ensifer	meliloti	1804
Burghardt 2018	1	97	Bacteria	101	Proteobacteria	Alphaproteobacteria	Rhizobiales	Rhizobiaceae	Ensifer	meliloti	1808
Burghardt 2018	1	98	Bacteria	101	Proteobacteria	Alphaproteobacteria	Rhizobiales	Rhizobiaceae	Ensifer	meliloti	1819
Burghardt 2018	1	99	Bacteria	101	Proteobacteria	Alphaproteobacteria	Rhizobiales	Rhizobiaceae	Ensifer	meliloti	1883
Burghardt 2018	1	100	Bacteria	101	Proteobacteria	Alphaproteobacteria	Rhizobiales	Rhizobiaceae	Ensifer	meliloti	1919
Burghardt 2018	1	101	Bacteria	101	Proteobacteria	Alphaproteobacteria	Rhizobiales	Rhizobiaceae	Ensifer	meliloti	3011
Durán 2018	1	55	Bacteria	148	Proteobacteria	Alphaproteobacteria	Caulobacterales	Caulobacteraceae	Brevundimonas		Root1279
Durán 2018	1	56	Bacteria	148	Proteobacteria	Alphaproteobacteria	Caulobacterales	Caulobacteraceae	Caulobacter		Root342
Durán 2018	1	57	Bacteria	148	Proteobacteria	Alphaproteobacteria	Caulobacterales	Caulobacteraceae	Caulobacter		Root343
Durán 2018	1	58	Bacteria	148	Proteobacteria	Alphaproteobacteria	Caulobacterales	Caulobacteraceae	Caulobacter		Root656
Durán 2018	1	59	Bacteria	148	Proteobacteria	Alphaproteobacteria	Caulobacterales	Caulobacteraceae	Caulobacter		Root487D2Y
Durán 2018	1	60	Bacteria	148	Proteobacteria	Alphaproteobacteria	Caulobacterales	Caulobacteraceae	Caulobacter		Root1455
Durán 2018	1	61	Bacteria	148	Proteobacteria	Alphaproteobacteria	Caulobacterales	Caulobacteraceae	Caulobacter		Root487D2Y
Durán 2018	1	62	Bacteria	148	Proteobacteria	Alphaproteobacteria	Caulobacterales	Caulobacteraceae	Phenylobacterium		Root700
Durán 2018	1	63	Bacteria	148	Proteobacteria	Alphaproteobacteria	Caulobacterales	Caulobacteraceae	Phenylobacterium		Root1277
Durán 2018	1	64	Bacteria	148	Proteobacteria	Alphaproteobacteria	Rhizobiales	Bradyrhizobiaceae	Bosea		Root381
Durán 2018	1	65	Bacteria	148	Proteobacteria	Alphaproteobacteria	Rhizobiales	Bradyrhizobiaceae	Bosea		Root670
Durán 2018	1	66	Bacteria	148	Proteobacteria	Alphaproteobacteria	Rhizobiales	Bradyrhizobiaceae	Bosea		Root483D1
Durán 2018	1	67	Bacteria	148	Proteobacteria	Alphaproteobacteria	Rhizobiales	Hyphomicrobiaceae	Devosia		Root105
Durán 2018	1	68	Bacteria	148	Proteobacteria	Alphaproteobacteria	Rhizobiales	Hyphomicrobiaceae	Devosia		Root436
Durán 2018	1	69	Bacteria	148	Proteobacteria	Alphaproteobacteria	Rhizobiales	Hyphomicrobiaceae	Devosia		Root685
Durán 2018	1	70	Bacteria	148	Proteobacteria	Alphaproteobacteria	Rhizobiales	Hyphomicrobiaceae	Devosia		Root413D1
Durán 2018	1	71	Bacteria	148	Proteobacteria	Alphaproteobacteria	Rhizobiales	Hyphomicrobiaceae	Devosia		Root635
Durán 2018	1	72	Bacteria	148	Proteobacteria	Alphaproteobacteria	Rhizobiales	Phyllobacteriaceae	Aminobacter		Root100
Durán 2018	1	73	Bacteria	148	Proteobacteria	Alphaproteobacteria	Rhizobiales	Phyllobacteriaceae	Hoeflea		Root268
Durán 2018	1	74	Bacteria	148	Proteobacteria	Alphaproteobacteria	Rhizobiales	Phyllobacteriaceae	Hoeflea		Root1212
Durán 2018	1	75	Bacteria	148	Proteobacteria	Alphaproteobacteria	Rhizobiales	Phyllobacteriaceae	Mesorhizobium		Root102
Durán 2018	1	76	Bacteria	148	Proteobacteria	Alphaproteobacteria	Rhizobiales	Rhizobiaceae	Ensifer		Root31
Durán 2018	1	77	Bacteria	148	Proteobacteria	Alphaproteobacteria	Rhizobiales	Rhizobiaceae	Ensifer		Root74
Durán 2018	1	78	Bacteria	148	Proteobacteria	Alphaproteobacteria	Rhizobiales	Rhizobiaceae	Ensifer		Root86
Durán 2018	1	79	Bacteria	148	Proteobacteria	Alphaproteobacteria	Rhizobiales	Rhizobiaceae	Ensifer		Root127
Durán 2018	1	80	Bacteria	148	Proteobacteria	Alphaproteobacteria	Rhizobiales	Rhizobiaceae	Ensifer		Root142
Durán 2018	1	81	Bacteria	148	Proteobacteria	Alphaproteobacteria	Rhizobiales	Rhizobiaceae	Ensifer		Root231
Durán 2018	1	82	Bacteria	148	Proteobacteria	Alphaproteobacteria	Rhizobiales	Rhizobiaceae	Ensifer		Root258
Durán 2018	1	83	Bacteria	148	Proteobacteria	Alphaproteobacteria	Rhizobiales	Rhizobiaceae	Ensifer		Root278
Durán 2018	1	84	Bacteria	148	Proteobacteria	Alphaproteobacteria	Rhizobiales	Rhizobiaceae	Ensifer		Root423
Durán 2018	1	85	Bacteria	148	Proteobacteria	Alphaproteobacteria	Rhizobiales	Rhizobiaceae	Ensifer		Root558
Durán 2018	1	86	Bacteria	148	Proteobacteria	Alphaproteobacteria	Rhizobiales	Rhizobiaceae	Ensifer		Root954
Durán 2018	1	87	Bacteria	148	Proteobacteria	Alphaproteobacteria	Rhizobiales	Rhizobiaceae	Ensifer		Root1252
Durán 2018	1	88	Bacteria	148	Proteobacteria	Alphaproteobacteria	Rhizobiales	Rhizobiaceae	Rhizobium		Root73
Durán 2018	1	89	Bacteria	148	Proteobacteria	Alphaproteobacteria	Rhizobiales	Rhizobiaceae	Rhizobium		Root482
Durán 2018	1	90	Bacteria	148	Proteobacteria	Alphaproteobacteria	Rhizobiales	Rhizobiaceae	Rhizobium		Root491
Durán 2018	1	91	Bacteria	148	Proteobacteria	Alphaproteobacteria	Rhizobiales	Rhizobiaceae	Rhizobium		Root564
Durán 2018	1	92	Bacteria	148	Proteobacteria	Alphaproteobacteria	Rhizobiales	Rhizobiaceae	Rhizobium		Root621
Durán 2018	1	93	Bacteria	148	Proteobacteria	Alphaproteobacteria	Rhizobiales	Rhizobiaceae	Rhizobium		Root651
Durán 2018	1	94	Bacteria	148	Proteobacteria	Alphaproteobacteria	Rhizobiales	Rhizobiaceae	Rhizobium		Root679
Durán 2018	1	95	Bacteria	148	Proteobacteria	Alphaproteobacteria	Rhizobiales	Rhizobiaceae	Rhizobium		Root680
Durán 2018	1	96	Bacteria	148	Proteobacteria	Alphaproteobacteria	Rhizobiales	Rhizobiaceae	Rhizobium		Root708
Durán 2018	1	97	Bacteria	148	Proteobacteria	Alphaproteobacteria	Rhizobiales	Rhizobiaceae	Rhizobium		Root1203
Durán 2018	1	98	Bacteria	148	Proteobacteria	Alphaproteobacteria	Rhizobiales	Rhizobiaceae	Rhizobium		Root1204
Durán 2018	1	99	Bacteria	148	Proteobacteria	Alphaproteobacteria	Rhizobiales	Rhizobiaceae	Rhizobium		Root1220
Durán 2018	1	100	Bacteria	148	Proteobacteria	Alphaproteobacteria	Rhizobiales	Rhizobiaceae	Rhizobium		Root482D2
Durán 2018	1	101	Bacteria	148	Proteobacteria	Alphaproteobacteria	Rhizobiales	Rhizobiaceae	Rhizobium		Root483D2
Durán 2018	1	102	Bacteria	148	Proteobacteria	Alphaproteobacteria	Rhizobiales	Xanthobacteraceae	Pseudolabrys		Root1462
Durán 2018	1	103	Bacteria	148	Proteobacteria	Alphaproteobacteria	Sphingomonadales	Sphingomonadaceae	Sphingomonas		Root50
Durán 2018	1	104	Bacteria	148	Proteobacteria	Alphaproteobacteria	Sphingomonadales	Sphingomonadaceae	Sphingomonas		Root710
Durán 2018	1	105	Bacteria	148	Proteobacteria	Alphaproteobacteria	Sphingomonadales	Sphingomonadaceae	Sphingomonas		Root720
Durán 2018	1	106	Bacteria	148	Proteobacteria	Alphaproteobacteria	Sphingomonadales	Sphingomonadaceae	Sphingomonas		Root1294
Durán 2018	1	107	Bacteria	148	Proteobacteria	Alphaproteobacteria	Sphingomonadales	Sphingomonadaceae	Sphingopyxis		Root154
Durán 2018	1	108	Bacteria	148	Proteobacteria	Alphaproteobacteria	Sphingomonadales	Sphingomonadaceae	Sphingopyxis		Root214
Durán 2018	1	109	Bacteria	148	Proteobacteria	Alphaproteobacteria	Sphingomonadales	Sphingomonadaceae	Sphingopyxis		Root1497
Durán 2018	1	110	Bacteria	148	Proteobacteria	Betaproteobacteria	Burkholderiales	Alcaligenaceae	Bordetella		Root83
Durán 2018	1	111	Bacteria	148	Proteobacteria	Betaproteobacteria	Burkholderiales	Burkholderiaceae	Cupriavidus		Root919
Durán 2018	1	112	Bacteria	148	Proteobacteria	Betaproteobacteria	Burkholderiales	Comamonadaceae	Acidovorax		Root70
Durán 2018	1	113	Bacteria	148	Proteobacteria	Betaproteobacteria	Burkholderiales	Comamonadaceae	Acidovorax		Root217
Durán 2018	1	114	Bacteria	148	Proteobacteria	Betaproteobacteria	Burkholderiales	Comamonadaceae	Acidovorax		Root219
Durán 2018	1	115	Bacteria	148	Proteobacteria	Betaproteobacteria	Burkholderiales	Comamonadaceae	Acidovorax		Root275
Durán 2018	1	116	Bacteria	148	Proteobacteria	Betaproteobacteria	Burkholderiales	Comamonadaceae	Acidovorax		Root402
Durán 2018	1	117	Bacteria	148	Proteobacteria	Betaproteobacteria	Burkholderiales	Comamonadaceae	Pelomonas		Root1217
Durán 2018	1	118	Bacteria	148	Proteobacteria	Betaproteobacteria	Burkholderiales	Comamonadaceae	Variovorax		Root411
Durán 2018	1	119	Bacteria	148	Proteobacteria	Betaproteobacteria	Burkholderiales	Comamonadaceae	Variovorax		Root434
Durán 2018	1	120	Bacteria	148	Proteobacteria	Betaproteobacteria	Burkholderiales	Comamonadaceae	Variovorax		Root473
Durán 2018	1	121	Bacteria	148	Proteobacteria	Betaproteobacteria	Burkholderiales	Comamonadaceae	Variovorax		Root318D1
Durán 2018	1	122	Bacteria	148	Proteobacteria	Betaproteobacteria	Burkholderiales	Oxalobacteraceae	Duganella		Root336D2
Durán 2018	1	123	Bacteria	148	Proteobacteria	Betaproteobacteria	Burkholderiales	Oxalobacteraceae	Massilia		Root335
Durán 2018	1	124	Bacteria	148	Proteobacteria	Betaproteobacteria	Burkholderiales	Oxalobacteraceae	Massilia		Root1438
Durán 2018	1	125	Bacteria	148	Proteobacteria	Betaproteobacteria	Burkholderiales	Oxalobacteraceae	Massilia		Root1485
Durán 2018	1	126	Bacteria	148	Proteobacteria	Gammaproteobacteria	Pseudomonadales	Pseudomonadaceae	Pseudomonas		Root9
Durán 2018	1	127	Bacteria	148	Proteobacteria	Gammaproteobacteria	Pseudomonadales	Pseudomonadaceae	Pseudomonas		Root68
Durán 2018	1	128	Bacteria	148	Proteobacteria	Gammaproteobacteria	Pseudomonadales	Pseudomonadaceae	Pseudomonas		Root71
Durán 2018	1	129	Bacteria	148	Proteobacteria	Gammaproteobacteria	Pseudomonadales	Pseudomonadaceae	Pseudomonas		Root329
Durán 2018	1	130	Bacteria	148	Proteobacteria	Gammaproteobacteria	Pseudomonadales	Pseudomonadaceae	Pseudomonas		Root401
Durán 2018	1	131	Bacteria	148	Proteobacteria	Gammaproteobacteria	Pseudomonadales	Pseudomonadaceae	Pseudomonas		Root562
Durán 2018	1	132	Bacteria	148	Proteobacteria	Gammaproteobacteria	Pseudomonadales	Pseudomonadaceae	Pseudomonas		Root569
Durán 2018	1	133	Bacteria	148	Proteobacteria	Gammaproteobacteria	Pseudomonadales	Pseudomonadaceae	Rhizobacter		Root29
Durán 2018	1	134	Bacteria	148	Proteobacteria	Gammaproteobacteria	Pseudomonadales	Pseudomonadaceae	Rhizobacter		Root404
Durán 2018	1	135	Bacteria	148	Proteobacteria	Gammaproteobacteria	Pseudomonadales	Pseudomonadaceae	Rhizobacter		Root1221
Durán 2018	1	136	Bacteria	148	Proteobacteria	Gammaproteobacteria	Pseudomonadales	Pseudomonadaceae	Rhizobacter		Root16D2
Durán 2018	1	137	Bacteria	148	Proteobacteria	Gammaproteobacteria	Xanthomonadales	Xanthomonadaceae	Lysobacter		Root76
Durán 2018	1	138	Bacteria	148	Proteobacteria	Gammaproteobacteria	Xanthomonadales	Xanthomonadaceae	Lysobacter		Root559
Durán 2018	1	139	Bacteria	148	Proteobacteria	Gammaproteobacteria	Xanthomonadales	Xanthomonadaceae	Lysobacter		Root604
Durán 2018	1	140	Bacteria	148	Proteobacteria	Gammaproteobacteria	Xanthomonadales	Xanthomonadaceae	Lysobacter		Root666
Durán 2018	1	141	Bacteria	148	Proteobacteria	Gammaproteobacteria	Xanthomonadales	Xanthomonadaceae	Lysobacter		Root667
Durán 2018	1	142	Bacteria	148	Proteobacteria	Gammaproteobacteria	Xanthomonadales	Xanthomonadaceae	Lysobacter		Root690
Durán 2018	1	143	Bacteria	148	Proteobacteria	Gammaproteobacteria	Xanthomonadales	Xanthomonadaceae	Lysobacter		Root916
Durán 2018	1	144	Bacteria	148	Proteobacteria	Gammaproteobacteria	Xanthomonadales	Xanthomonadaceae	Lysobacter		Root983
Durán 2018	1	145	Bacteria	148	Proteobacteria	Gammaproteobacteria	Xanthomonadales	Xanthomonadaceae	Pseudoxanthomonas		Root630
Durán 2018	1	146	Bacteria	148	Proteobacteria	Gammaproteobacteria	Xanthomonadales	Xanthomonadaceae	Rhodanobacter		Root627
Durán 2018	1	147	Bacteria	148	Proteobacteria	Gammaproteobacteria	Xanthomonadales	Xanthomonadaceae	Rhodanobacter		Soil772
Durán 2018	1	148	Bacteria	148	Proteobacteria	Gammaproteobacteria	Xanthomonadales	Xanthomonadaceae	Rhodanobacter		Soil773
Finkel 2019	1	106	Bacteria	183	Proteobacteria	Alphaproteobacteria	Caulobacterales	Caulobacteraceae	Brevundimonas		CL4
Finkel 2019	1	107	Bacteria	183	Proteobacteria	Alphaproteobacteria	Caulobacterales	Caulobacteraceae	Brevundimonas		MF374
Finkel 2019	1	108	Bacteria	183	Proteobacteria	Alphaproteobacteria	Caulobacterales	Caulobacteraceae	Caulobacter		MF279
Finkel 2019	1	109	Bacteria	183	Proteobacteria	Alphaproteobacteria	Rhizobiales	Bradyrhizobiaceae	Bosea		CL19
Finkel 2019	1	110	Bacteria	183	Proteobacteria	Alphaproteobacteria	Rhizobiales	Brucellaceae	Ochrobactrum		CL2
Finkel 2019	1	111	Bacteria	183	Proteobacteria	Alphaproteobacteria	Rhizobiales	Brucellaceae	Ochrobactrum		MF370
Finkel 2019	1	112	Bacteria	183	Proteobacteria	Alphaproteobacteria	Rhizobiales	Methylobacteriaceae	Methylobacterium		CL125
Finkel 2019	1	113	Bacteria	183	Proteobacteria	Alphaproteobacteria	Rhizobiales	Methylobacteriaceae	Methylobacterium		CL126
Finkel 2019	1	114	Bacteria	183	Proteobacteria	Alphaproteobacteria	Rhizobiales	Methylobacteriaceae	Methylobacterium		CL129
Finkel 2019	1	115	Bacteria	183	Proteobacteria	Alphaproteobacteria	Rhizobiales	Methylobacteriaceae	Methylobacterium		CL136
Finkel 2019	1	116	Bacteria	183	Proteobacteria	Alphaproteobacteria	Rhizobiales	Methylobacteriaceae	Methylobacterium		CL143
Finkel 2019	1	117	Bacteria	183	Proteobacteria	Alphaproteobacteria	Rhizobiales	Methylobacteriaceae	Methylobacterium		MF174
Finkel 2019	1	118	Bacteria	183	Proteobacteria	Alphaproteobacteria	Rhizobiales	Methylobacteriaceae	Methylobacterium		MF190
Finkel 2019	1	119	Bacteria	183	Proteobacteria	Alphaproteobacteria	Rhizobiales	Methylobacteriaceae	Methylobacterium		MF275
Finkel 2019	1	120	Bacteria	183	Proteobacteria	Alphaproteobacteria	Rhizobiales	Methylobacteriaceae	Methylobacterium		MF300
Finkel 2019	1	121	Bacteria	183	Proteobacteria	Alphaproteobacteria	Rhizobiales	Methylobacteriaceae	Methylobacterium		MF378
Finkel 2019	1	122	Bacteria	183	Proteobacteria	Alphaproteobacteria	Rhizobiales	Phyllobacteriaceae	Phyllobacterium		CL33
Finkel 2019	1	123	Bacteria	183	Proteobacteria	Alphaproteobacteria	Rhizobiales	Phyllobacteriaceae	Phyllobacterium		MF177
Finkel 2019	1	124	Bacteria	183	Proteobacteria	Alphaproteobacteria	Rhizobiales	Phyllobacteriaceae	Phyllobacterium		MF302
Finkel 2019	1	125	Bacteria	183	Proteobacteria	Alphaproteobacteria	Rhizobiales	Rhizobiaceae	Agrobacterium	tumefaciens	CL32
Finkel 2019	1	126	Bacteria	183	Proteobacteria	Alphaproteobacteria	Rhizobiales	Rhizobiaceae	Agrobacterium		CL41
Finkel 2019	1	127	Bacteria	183	Proteobacteria	Alphaproteobacteria	Rhizobiales	Rhizobiaceae	Agrobacterium		MF10
Finkel 2019	1	128	Bacteria	183	Proteobacteria	Alphaproteobacteria	Rhizobiales	Rhizobiaceae	Agrobacterium		MF224
Finkel 2019	1	129	Bacteria	183	Proteobacteria	Alphaproteobacteria	Rhizobiales	Rhizobiaceae	Agrobacterium		MF33
Finkel 2019	1	130	Bacteria	183	Proteobacteria	Alphaproteobacteria	Rhizobiales	Rhizobiaceae	Agrobacterium		MF389
Finkel 2019	1	131	Bacteria	183	Proteobacteria	Alphaproteobacteria	Rhizobiales	Rhizobiaceae	Rhizobium		MF2
Finkel 2019	1	132	Bacteria	183	Proteobacteria	Alphaproteobacteria	Rhizobiales	Rhizobiaceae	Rhizobium		MF28
Finkel 2019	1	133	Bacteria	183	Proteobacteria	Alphaproteobacteria	Rhizobiales	Rhizobiaceae	Rhizobium		MF42
Finkel 2019	1	134	Bacteria	183	Proteobacteria	Alphaproteobacteria	Rhizobiales	Rhizobiaceae	Rhizobium		MF57
Finkel 2019	1	135	Bacteria	183	Proteobacteria	Alphaproteobacteria	Rhizobiales	Rhizobiaceae	Rhizobium		MF72 (IBUN)
Finkel 2019	1	136	Bacteria	183	Proteobacteria	Alphaproteobacteria	Sphingomonadales	Sphingomonadaceae	Sphingomonas		MF220A
Finkel 2019	1	137	Bacteria	183	Proteobacteria	Alphaproteobacteria	Sphingomonadales	Sphingomonadaceae	Sphingomonas		MF305
Finkel 2019	1	138	Bacteria	183	Proteobacteria	Betaproteobacteria	Burkholderiales	Burkholderiaceae	Burkholderia	bryophila	MF376
Finkel 2019	1	139	Bacteria	183	Proteobacteria	Betaproteobacteria	Burkholderiales	Burkholderiaceae	Burkholderia	cenocepacia	MF6
Finkel 2019	1	140	Bacteria	183	Proteobacteria	Betaproteobacteria	Burkholderiales	Burkholderiaceae	Burkholderia	cenocepacia	MF7
Finkel 2019	1	141	Bacteria	183	Proteobacteria	Betaproteobacteria	Burkholderiales	Burkholderiaceae	Burkholderia		CL11
Finkel 2019	1	142	Bacteria	183	Proteobacteria	Betaproteobacteria	Burkholderiales	Burkholderiaceae	Burkholderia		MF384
Finkel 2019	1	143	Bacteria	183	Proteobacteria	Betaproteobacteria	Burkholderiales	Comamonadaceae	Variovorax	paradoxus	CL14
Finkel 2019	1	144	Bacteria	183	Proteobacteria	Betaproteobacteria	Burkholderiales	Comamonadaceae	Variovorax	paradoxus	MF110
Finkel 2019	1	145	Bacteria	183	Proteobacteria	Betaproteobacteria	Burkholderiales	Comamonadaceae	Variovorax	paradoxus	MF295
Finkel 2019	1	146	Bacteria	183	Proteobacteria	Betaproteobacteria	Burkholderiales	Comamonadaceae	Variovorax	paradoxus	MF349
Finkel 2019	1	147	Bacteria	183	Proteobacteria	Betaproteobacteria	Burkholderiales	Comamonadaceae	Variovorax	paradoxus	MF369
Finkel 2019	1	148	Bacteria	183	Proteobacteria	Betaproteobacteria	Burkholderiales	Comamonadaceae	Variovorax	paradoxus	MF4
Finkel 2019	1	149	Bacteria	183	Proteobacteria	Betaproteobacteria	Burkholderiales	Comamonadaceae	Variovorax		MF160
Finkel 2019	1	150	Bacteria	183	Proteobacteria	Betaproteobacteria	Burkholderiales	Comamonadaceae	Variovorax		MF278
Finkel 2019	1	151	Bacteria	183	Proteobacteria	Betaproteobacteria	Burkholderiales	Comamonadaceae	Variovorax		MF350
Finkel 2019	1	152	Bacteria	183	Proteobacteria	Betaproteobacteria	Burkholderiales	Comamonadaceae	Variovorax		MF375
Finkel 2019	1	153	Bacteria	183	Proteobacteria	Betaproteobacteria	Burkholderiales	Ralstoniaceae	Ralstonia		CL144
Finkel 2019	1	154	Bacteria	183	Proteobacteria	Betaproteobacteria	Burkholderiales	Ralstoniaceae	Ralstonia		CL21
Finkel 2019	1	155	Bacteria	183	Proteobacteria	Gammaproteobacteria	Pseudomonadales	Moraxellaceae	Acinetobacter		CL69
Finkel 2019	1	156	Bacteria	183	Proteobacteria	Gammaproteobacteria	Pseudomonadales	Moraxellaceae	Acinetobacter		CL71
Finkel 2019	1	157	Bacteria	183	Proteobacteria	Gammaproteobacteria	Pseudomonadales	Pseudomonadaceae	Pseudomonas	brassicacearum	MF51
Finkel 2019	1	158	Bacteria	183	Proteobacteria	Gammaproteobacteria	Pseudomonadales	Pseudomonadaceae	Pseudomonas	mandelii	MF36
Finkel 2019	1	159	Bacteria	183	Proteobacteria	Gammaproteobacteria	Pseudomonadales	Pseudomonadaceae	Pseudomonas	umsongensis	CL58
Finkel 2019	1	160	Bacteria	183	Proteobacteria	Gammaproteobacteria	Pseudomonadales	Pseudomonadaceae	Pseudomonas	umsongensis	MF20
Finkel 2019	1	161	Bacteria	183	Proteobacteria	Gammaproteobacteria	Pseudomonadales	Pseudomonadaceae	Pseudomonas		MF113
Finkel 2019	1	162	Bacteria	183	Proteobacteria	Gammaproteobacteria	Pseudomonadales	Pseudomonadaceae	Pseudomonas		MF3
Finkel 2019	1	163	Bacteria	183	Proteobacteria	Gammaproteobacteria	Pseudomonadales	Pseudomonadaceae	Pseudomonas		MF35
Finkel 2019	1	164	Bacteria	183	Proteobacteria	Gammaproteobacteria	Pseudomonadales	Pseudomonadaceae	Pseudomonas		MF397
Finkel 2019	1	165	Bacteria	183	Proteobacteria	Gammaproteobacteria	Pseudomonadales	Pseudomonadaceae	Pseudomonas		MF45
Finkel 2019	1	166	Bacteria	183	Proteobacteria	Gammaproteobacteria	Pseudomonadales	Pseudomonadaceae	Pseudomonas		MF48
Finkel 2019	1	167	Bacteria	183	Proteobacteria	Gammaproteobacteria	Pseudomonadales	Pseudomonadaceae	Pseudomonas		MF50
Finkel 2019	1	168	Bacteria	183	Proteobacteria	Gammaproteobacteria	Xanthomonadales	Rhodanobacteraceae	Dyella	japonica	MF79
Finkel 2019	1	169	Bacteria	183	Proteobacteria	Gammaproteobacteria	Xanthomonadales	Rhodanobacteraceae	Dyella	marensis	MF178
Finkel 2019	1	170	Bacteria	183	Proteobacteria	Gammaproteobacteria	Xanthomonadales	Rhodanobacteraceae	Dyella		MF333
Finkel 2019	1	171	Bacteria	183	Proteobacteria	Gammaproteobacteria	Xanthomonadales	Rhodanobacteraceae	Luteibacter		MF138
Finkel 2019	1	172	Bacteria	183	Proteobacteria	Gammaproteobacteria	Xanthomonadales	Rhodanobacteraceae	Luteibacter		MF22
Finkel 2019	1	173	Bacteria	183	Proteobacteria	Gammaproteobacteria	Xanthomonadales	Rhodanobacteraceae	Luteibacter		MF329
Finkel 2019	1	174	Bacteria	183	Proteobacteria	Gammaproteobacteria	Xanthomonadales	Rhodanobacteraceae	Luteibacter		MF331
Finkel 2019	1	175	Bacteria	183	Proteobacteria	Gammaproteobacteria	Xanthomonadales	Rhodanobacteraceae	Luteibacter		MF366
Finkel 2019	1	176	Bacteria	183	Proteobacteria	Gammaproteobacteria	Xanthomonadales	Xanthomonadaceae	Stenotrophomonas		MF92
Bai 2015	1	86	Bacteria	188	Proteobacteria	Alphaproteobacteria	Caulobacterales	Caulobacteraceae	Brevundimonas
Bai 2015	1	87	Bacteria	188	Proteobacteria	Alphaproteobacteria	Caulobacterales	Caulobacteraceae	Brevundimonas
Bai 2015	1	88	Bacteria	188	Proteobacteria	Alphaproteobacteria	Caulobacterales	Caulobacteraceae	Brevundimonas
Bai 2015	1	89	Bacteria	188	Proteobacteria	Alphaproteobacteria	Caulobacterales	Caulobacteraceae	Caulobacter
Bai 2015	1	90	Bacteria	188	Proteobacteria	Alphaproteobacteria	Caulobacterales	Caulobacteraceae	Caulobacter
Bai 2015	1	91	Bacteria	188	Proteobacteria	Alphaproteobacteria	Caulobacterales	Caulobacteraceae	Caulobacter
Bai 2015	1	92	Bacteria	188	Proteobacteria	Alphaproteobacteria	Caulobacterales	Caulobacteraceae	Caulobacter
Bai 2015	1	93	Bacteria	188	Proteobacteria	Alphaproteobacteria	Caulobacterales	Caulobacteraceae	Caulobacter
Bai 2015	1	94	Bacteria	188	Proteobacteria	Alphaproteobacteria	Caulobacterales	Caulobacteraceae	Phenylobacterium
Bai 2015	1	95	Bacteria	188	Proteobacteria	Alphaproteobacteria	Caulobacterales	Caulobacteraceae	Phenylobacterium
Bai 2015	1	96	Bacteria	188	Proteobacteria	Alphaproteobacteria	Rhizobiales	Bradyrhizobiaceae	Afipia
Bai 2015	1	97	Bacteria	188	Proteobacteria	Alphaproteobacteria	Rhizobiales	Bradyrhizobiaceae	Bosea
Bai 2015	1	98	Bacteria	188	Proteobacteria	Alphaproteobacteria	Rhizobiales	Bradyrhizobiaceae	Bosea
Bai 2015	1	99	Bacteria	188	Proteobacteria	Alphaproteobacteria	Rhizobiales	Bradyrhizobiaceae	Bosea
Bai 2015	1	100	Bacteria	188	Proteobacteria	Alphaproteobacteria	Rhizobiales	Hyphomicrobiaceae	Devosia
Bai 2015	1	101	Bacteria	188	Proteobacteria	Alphaproteobacteria	Rhizobiales	Hyphomicrobiaceae	Devosia
Bai 2015	1	102	Bacteria	188	Proteobacteria	Alphaproteobacteria	Rhizobiales	Hyphomicrobiaceae	Devosia
Bai 2015	1	103	Bacteria	188	Proteobacteria	Alphaproteobacteria	Rhizobiales	Hyphomicrobiaceae	Devosia
Bai 2015	1	104	Bacteria	188	Proteobacteria	Alphaproteobacteria	Rhizobiales	Hyphomicrobiaceae	Devosia
Bai 2015	1	105	Bacteria	188	Proteobacteria	Alphaproteobacteria	Rhizobiales	Methylobacteriaceae	Methylobacterium
Bai 2015	1	106	Bacteria	188	Proteobacteria	Alphaproteobacteria	Rhizobiales	Phyllobacteriaceae	Aminobacter
Bai 2015	1	107	Bacteria	188	Proteobacteria	Alphaproteobacteria	Rhizobiales	Phyllobacteriaceae	Hoeflea
Bai 2015	1	108	Bacteria	188	Proteobacteria	Alphaproteobacteria	Rhizobiales	Phyllobacteriaceae	Mesorhizobium
Bai 2015	1	109	Bacteria	188	Proteobacteria	Alphaproteobacteria	Rhizobiales	Phyllobacteriaceae	Mesorhizobium
Bai 2015	1	110	Bacteria	188	Proteobacteria	Alphaproteobacteria	Rhizobiales	Phyllobacteriaceae	Mesorhizobium
Bai 2015	1	111	Bacteria	188	Proteobacteria	Alphaproteobacteria	Rhizobiales	Phyllobacteriaceae	Mesorhizobium
Bai 2015	1	112	Bacteria	188	Proteobacteria	Alphaproteobacteria	Rhizobiales	Phyllobacteriaceae	Mesorhizobium
Bai 2015	1	113	Bacteria	188	Proteobacteria	Alphaproteobacteria	Rhizobiales	Phyllobacteriaceae	Nitratireductor
Bai 2015	1	114	Bacteria	188	Proteobacteria	Alphaproteobacteria	Rhizobiales	Rhizobiaceae	Ensifer
Bai 2015	1	115	Bacteria	188	Proteobacteria	Alphaproteobacteria	Rhizobiales	Rhizobiaceae	Ensifer
Bai 2015	1	116	Bacteria	188	Proteobacteria	Alphaproteobacteria	Rhizobiales	Rhizobiaceae	Ensifer
Bai 2015	1	117	Bacteria	188	Proteobacteria	Alphaproteobacteria	Rhizobiales	Rhizobiaceae	Ensifer
Bai 2015	1	118	Bacteria	188	Proteobacteria	Alphaproteobacteria	Rhizobiales	Rhizobiaceae	Ensifer
Bai 2015	1	119	Bacteria	188	Proteobacteria	Alphaproteobacteria	Rhizobiales	Rhizobiaceae	Ensifer
Bai 2015	1	120	Bacteria	188	Proteobacteria	Alphaproteobacteria	Rhizobiales	Rhizobiaceae	Ensifer
Bai 2015	1	121	Bacteria	188	Proteobacteria	Alphaproteobacteria	Rhizobiales	Rhizobiaceae	Ensifer
Bai 2015	1	122	Bacteria	188	Proteobacteria	Alphaproteobacteria	Rhizobiales	Rhizobiaceae	Ensifer
Bai 2015	1	123	Bacteria	188	Proteobacteria	Alphaproteobacteria	Rhizobiales	Rhizobiaceae	Rhizobium
Bai 2015	1	124	Bacteria	188	Proteobacteria	Alphaproteobacteria	Rhizobiales	Rhizobiaceae	Rhizobium
Bai 2015	1	125	Bacteria	188	Proteobacteria	Alphaproteobacteria	Rhizobiales	Rhizobiaceae	Rhizobium
Bai 2015	1	126	Bacteria	188	Proteobacteria	Alphaproteobacteria	Rhizobiales	Rhizobiaceae	Rhizobium
Bai 2015	1	127	Bacteria	188	Proteobacteria	Alphaproteobacteria	Rhizobiales	Rhizobiaceae	Rhizobium
Bai 2015	1	128	Bacteria	188	Proteobacteria	Alphaproteobacteria	Rhizobiales	Rhizobiaceae	Rhizobium
Bai 2015	1	129	Bacteria	188	Proteobacteria	Alphaproteobacteria	Rhizobiales	Rhizobiaceae	Rhizobium
Bai 2015	1	130	Bacteria	188	Proteobacteria	Alphaproteobacteria	Rhizobiales	Rhizobiaceae	Rhizobium
Bai 2015	1	131	Bacteria	188	Proteobacteria	Alphaproteobacteria	Rhizobiales	Rhizobiaceae	Rhizobium
Bai 2015	1	132	Bacteria	188	Proteobacteria	Alphaproteobacteria	Rhizobiales	Rhizobiaceae	Rhizobium
Bai 2015	1	133	Bacteria	188	Proteobacteria	Alphaproteobacteria	Rhizobiales	Xanthomonadaceae	Lysobacter
Bai 2015	1	134	Bacteria	188	Proteobacteria	Alphaproteobacteria	Rhizobiales	Xanthomonadaceae	Lysobacter
Bai 2015	1	135	Bacteria	188	Proteobacteria	Alphaproteobacteria	Rhizobiales	Xanthomonadaceae	Lysobacter
Bai 2015	1	136	Bacteria	188	Proteobacteria	Alphaproteobacteria	Rhizobiales	Xanthomonadaceae	Lysobacter
Bai 2015	1	137	Bacteria	188	Proteobacteria	Alphaproteobacteria	Rhizobiales	Xanthomonadaceae	Lysobacter
Bai 2015	1	138	Bacteria	188	Proteobacteria	Alphaproteobacteria	Rhizobiales	Xanthomonadaceae	Lysobacter
Bai 2015	1	139	Bacteria	188	Proteobacteria	Alphaproteobacteria	Rhizobiales	Xanthomonadaceae	Lysobacter
Bai 2015	1	140	Bacteria	188	Proteobacteria	Alphaproteobacteria	Rhizobiales	Xanthomonadaceae	Pseudoxanthomonas
Bai 2015	1	141	Bacteria	188	Proteobacteria	Alphaproteobacteria	Rhizobiales	Xanthomonadaceae	Rhodanobacter
Bai 2015	1	142	Bacteria	188	Proteobacteria	Alphaproteobacteria	Rhizobiales	Xanthomonadaceae	Rhodanobacter
Bai 2015	1	143	Bacteria	188	Proteobacteria	Alphaproteobacteria	Rhizobiales	Xanthomonadaceae	Rhodanobacter
Bai 2015	1	144	Bacteria	188	Proteobacteria	Alphaproteobacteria	Rhizobiales	Xanthomonadaceae	Rhodanobacter
Bai 2015	1	145	Bacteria	188	Proteobacteria	Alphaproteobacteria	Sphingomonadales	Erythrobacteraceae	Altererythrobacter
Bai 2015	1	146	Bacteria	188	Proteobacteria	Alphaproteobacteria	Sphingomonadales	Sphingomonadaceae	Sphingomonas
Bai 2015	1	147	Bacteria	188	Proteobacteria	Alphaproteobacteria	Sphingomonadales	Sphingomonadaceae	Sphingomonas
Bai 2015	1	148	Bacteria	188	Proteobacteria	Alphaproteobacteria	Sphingomonadales	Sphingomonadaceae	Sphingomonas
Bai 2015	1	149	Bacteria	188	Proteobacteria	Alphaproteobacteria	Sphingomonadales	Sphingomonadaceae	Sphingomonas
Bai 2015	1	150	Bacteria	188	Proteobacteria	Alphaproteobacteria	Sphingomonadales	Sphingomonadaceae	Sphingopyxis
Bai 2015	1	151	Bacteria	188	Proteobacteria	Alphaproteobacteria	Sphingomonadales	Sphingomonadaceae	Sphingopyxis
Bai 2015	1	152	Bacteria	188	Proteobacteria	Alphaproteobacteria	Sphingomonadales	Sphingomonadaceae	Sphingopyxis
Bai 2015	1	153	Bacteria	188	Proteobacteria	Betaproteobacteria	Burkholderiales	Alcaligenaceae	Bordetella
Bai 2015	1	154	Bacteria	188	Proteobacteria	Betaproteobacteria	Burkholderiales	Alcaligenaceae	Bordetella
Bai 2015	1	155	Bacteria	188	Proteobacteria	Betaproteobacteria	Burkholderiales	Alcaligenaceae	Bordetella
Bai 2015	1	156	Bacteria	188	Proteobacteria	Betaproteobacteria	Burkholderiales	Comamonadaceae	Acidovorax
Bai 2015	1	157	Bacteria	188	Proteobacteria	Betaproteobacteria	Burkholderiales	Comamonadaceae	Acidovorax
Bai 2015	1	158	Bacteria	188	Proteobacteria	Betaproteobacteria	Burkholderiales	Comamonadaceae	Acidovorax
Bai 2015	1	159	Bacteria	188	Proteobacteria	Betaproteobacteria	Burkholderiales	Comamonadaceae	Acidovorax
Bai 2015	1	160	Bacteria	188	Proteobacteria	Betaproteobacteria	Burkholderiales	Comamonadaceae	Acidovorax
Bai 2015	1	161	Bacteria	188	Proteobacteria	Betaproteobacteria	Burkholderiales	Comamonadaceae	Acidovorax
Bai 2015	1	162	Bacteria	188	Proteobacteria	Betaproteobacteria	Burkholderiales	Comamonadaceae	Pelomonas
Bai 2015	1	163	Bacteria	188	Proteobacteria	Betaproteobacteria	Burkholderiales	Comamonadaceae	Pelomonas
Bai 2015	1	164	Bacteria	188	Proteobacteria	Betaproteobacteria	Burkholderiales	Comamonadaceae	Pelomonas
Bai 2015	1	165	Bacteria	188	Proteobacteria	Betaproteobacteria	Burkholderiales	Comamonadaceae	Pelomonas
Bai 2015	1	166	Bacteria	188	Proteobacteria	Betaproteobacteria	Burkholderiales	Comamonadaceae	Variovorax
Bai 2015	1	167	Bacteria	188	Proteobacteria	Betaproteobacteria	Burkholderiales	Comamonadaceae	Variovorax
Bai 2015	1	168	Bacteria	188	Proteobacteria	Betaproteobacteria	Burkholderiales	Comamonadaceae	Variovorax
Bai 2015	1	169	Bacteria	188	Proteobacteria	Betaproteobacteria	Burkholderiales	Comamonadaceae	Variovorax
Bai 2015	1	170	Bacteria	188	Proteobacteria	Betaproteobacteria	Burkholderiales	Oxalobacteraceae	Duganella
Bai 2015	1	171	Bacteria	188	Proteobacteria	Betaproteobacteria	Burkholderiales	Oxalobacteraceae	Duganella
Bai 2015	1	172	Bacteria	188	Proteobacteria	Betaproteobacteria	Burkholderiales	Oxalobacteraceae	Duganella
Bai 2015	1	173	Bacteria	188	Proteobacteria	Betaproteobacteria	Burkholderiales	Oxalobacteraceae	Duganella
Bai 2015	1	174	Bacteria	188	Proteobacteria	Betaproteobacteria	Burkholderiales	Oxalobacteraceae	Massilia
Bai 2015	1	175	Bacteria	188	Proteobacteria	Betaproteobacteria	Burkholderiales	Oxalobacteraceae	Massilia
Bai 2015	1	176	Bacteria	188	Proteobacteria	Betaproteobacteria	Burkholderiales	Oxalobacteraceae	Massilia
Bai 2015	1	177	Bacteria	188	Proteobacteria	Betaproteobacteria	Burkholderiales	Oxalobacteraceae	Massilia
Bai 2015	1	178	Bacteria	188	Proteobacteria	Betaproteobacteria	Burkholderiales	Oxalobacteraceae	Noviherbaspirillum
Bai 2015	1	179	Bacteria	188	Proteobacteria	Gammaproteobacteria	Pseudomonadales	Pseudomonadaceae	Pseudomonas
Bai 2015	1	180	Bacteria	188	Proteobacteria	Gammaproteobacteria	Pseudomonadales	Pseudomonadaceae	Pseudomonas
Bai 2015	1	181	Bacteria	188	Proteobacteria	Gammaproteobacteria	Pseudomonadales	Pseudomonadaceae	Pseudomonas
Bai 2015	1	182	Bacteria	188	Proteobacteria	Gammaproteobacteria	Pseudomonadales	Pseudomonadaceae	Pseudomonas
Bai 2015	1	183	Bacteria	188	Proteobacteria	Gammaproteobacteria	Pseudomonadales	Pseudomonadaceae	Pseudomonas
Bai 2015	1	184	Bacteria	188	Proteobacteria	Gammaproteobacteria	Pseudomonadales	Pseudomonadaceae	Pseudomonas
Bai 2015	1	185	Bacteria	188	Proteobacteria	Gammaproteobacteria	Pseudomonadales	Pseudomonadaceae	Pseudomonas
Bai 2015	1	186	Bacteria	188	Proteobacteria	Gammaproteobacteria	Pseudomonadales	Pseudomonadaceae	Rhizobacter
Bai 2015	1	187	Bacteria	188	Proteobacteria	Gammaproteobacteria	Pseudomonadales	Pseudomonadaceae	Rhizobacter
Bai 2015	1	188	Bacteria	188	Proteobacteria	Gammaproteobacteria	Pseudomonadales	Pseudomonadaceae	Rhizobacter

## Sheet: Actinobacteria
Ref	SynCom	Strain no.	Domain	SynCom Size	Phylum	Class	Order	Family	Genus	Species	Strain			Etiquetas de fila	Cuenta de Family
Lee 2020	1	1	Bacteria	4	Actinobacteria	Actinobacteria	Actinomycetales	Brevibacteriaceae	Brevibacterium	frigoritolerans				Microbacteriaceae	70
Santhanam 2019	1	1	Bacteria	5	Actinobacteria	Actinobacteria	Actinomycetales	Micrococcaceae	Arthrobacter	nitroguajacolicus	E46			Micrococcaceae	43
Niu 2018	1	3	Bacteria	7	Actinobacteria	Actinobacteria	Actinomycetales	Microbacteriaceae	Curtobacterium	pusillum	ZK5344			Streptomycetaceae	40
Zhang 2019	1	1	Bacteria	7	Actinobacteria	Actinobacteria	Actinomycetales	Nocardiaceae	Nocardioides		R1281			Nocardioidaceae	29
Zhang 2019	1	2	Bacteria	7	Actinobacteria	Actinobacteria	Actinomycetales	Micromonosporaceae	Micromonospora		R1398			Actinomycetales	27
Zhang 2019	1	3	Bacteria	7	Actinobacteria	Actinobacteria	Actinomycetales	Cellulomonadaceae	Cellulomonas		R1417			Nocardiaceae	23
Zhang 2019	1	4	Bacteria	7	Actinobacteria	Actinobacteria	Actinomycetales	Streptomycetaceae	Streptomyces		R1522			Mycobacteriaceae	23
Zhang 2019	1	5	Bacteria	7	Actinobacteria	Actinobacteria	Actinomycetales	Intrasporangiaceae	Tetrasphaera		R2217a			Intrasporangiaceae	21
Zhang 2019	1	6	Bacteria	7	Actinobacteria	Actinobacteria	Solirubrobacterales	Conexibacteraceae	Conexibacter		R1608			Cellulomonadaceae	8
Zheng 2019	1	1	Bacteria	7	Actinobacteria	Actinobacteria	Actinomycetales	Micrococcaceae	Arthrobacter	defluvii	06-OD12			Promicromonosporaceae	3
Zheng 2019	1	2	Bacteria	7	Actinobacteria	Actinobacteria	Actinomycetales	Streptomycetaceae	Streptomyces	prasinopilosus	34-Y1			Conexibacteraceae	1
Moccia 2020	1	1	Bacteria	10	Actinobacteria	Actinobacteria	Actinomycetales	Micrococcaceae	Arthrobacter		R85			Williamsiaceae	1
Moccia 2020	1	2	Bacteria	10	Actinobacteria	Actinobacteria	Actinomycetales	Micrococcaceae	Micrococcus		R34			Kineosporiaceae	1
Moccia 2020	1	3	Bacteria	10	Actinobacteria	Actinobacteria	Actinomycetales	Micrococcaceae	Micrococcus		R36			Brevibacteriaceae	1
Moccia 2020	1	4	Bacteria	10	Actinobacteria	Actinobacteria	Actinomycetales	Streptomycetaceae	Streptomyces		R81			Micromonosporaceae	1
Moccia 2020	1	5	Bacteria	10	Actinobacteria	Actinobacteria	Corynebacteriales	Williamsiaceae	Williamsia		R60			(en blanco)
Schulz-Bohm 2015	1	6	Bacteria	10	Actinobacteria	Actinobacteria	Micrococcales	Microbacteriaceae	Microbacterium		AD141			Total general	292
Armanhi 2018	1	5	Bacteria	19	Actinobacteria	Actinobacteria	Micrococcales	Microbacteriaceae	Microbacterium
Armanhi 2018	1	13	Bacteria	19	Actinobacteria	Actinobacteria	Streptomycetales	Streptomycetaceae	Streptomyces
Voges 2019	1	1	Bacteria	22	Actinobacteria	Actinobacteria	Actinomycetales	Cellulomonadaceae	Cellulomonas		Root137
Voges 2019	1	2	Bacteria	22	Actinobacteria	Actinobacteria	Actinomycetales	Microbacteriaceae	Microbacterium		Root166
Voges 2019	1	3	Bacteria	22	Actinobacteria	Actinobacteria	Actinomycetales	Microbacteriaceae	Yonghaparkia		Root332
Voges 2019	1	4	Bacteria	22	Actinobacteria	Actinobacteria	Actinomycetales	Microbacteriaceae	Agromyces		Root1464
Voges 2019	1	5	Bacteria	22	Actinobacteria	Actinobacteria	Actinomycetales	Nocardioidaceae	Nocardioides		Root614
Voges 2019	1	6	Bacteria	22	Actinobacteria	Actinobacteria	Actinomycetales	Streptomycetaceae	Streptomyces		Root1310
Voges 2019	1	7	Bacteria	22	Actinobacteria	Actinobacteria	Micrococcales	Intrasporangiaceae	Janibacter		Root563
CorreadeSouza 2019	1	14	Bacteria	25	Actinobacteria	Actinobacteria	Actinomycetales	Microbacteriaceae	Microbacterium		C05
CorreadeSouza 2019	1	22	Bacteria	25	Actinobacteria	Actinobacteria	Actinomycetales	Streptomycetaceae	Streptomyces		G01
Tsolakidou 2019	1	14	Bacteria	25	Actinobacteria	Actinobacteria	Actinomycetales	Microbacteriaceae	Microbacterium	foliorum	1Ba13
Tsolakidou 2019	1	15	Bacteria	25	Actinobacteria	Actinobacteria	Actinomycetales	Microbacteriaceae	Microbacterium	foliorum	2Ba37
Tsolakidou 2019	1	16	Bacteria	25	Actinobacteria	Actinobacteria	Actinomycetales	Microbacteriaceae	Microbacterium		1Ba51
Tsolakidou 2019	1	17	Bacteria	25	Actinobacteria	Actinobacteria	Actinomycetales	Microbacteriaceae	Microbacterium	esteraromaticum	3Ba33
Hu 2020	1	1	Bacteria	32	Actinobacteria	Actinobacteria	Actinobacteridae	Actinomycetales	Micrococcineae
Hu 2020	2	1	Bacteria	32	Actinobacteria	Actinobacteria	Actinobacteridae	Actinomycetales	Micrococcineae
Hu 2020	3	1	Bacteria	32	Actinobacteria	Actinobacteria	Actinobacteridae	Actinomycetales	Micrococcineae
Hu 2020	5	1	Bacteria	32	Actinobacteria	Actinobacteria	Actinobacteridae	Actinomycetales	Micrococcineae
Hu 2020	7	1	Bacteria	32	Actinobacteria	Actinobacteria	Actinobacteridae	Actinomycetales	Micrococcineae
Hu 2020	8	1	Bacteria	32	Actinobacteria	Actinobacteria	Actinobacteridae	Actinomycetales	Micrococcineae
Hu 2020	9	1	Bacteria	32	Actinobacteria	Actinobacteria	Actinobacteridae	Actinomycetales	Corynebacterineae
Hu 2020	10	1	Bacteria	32	Actinobacteria	Actinobacteria	Actinobacteridae	Actinomycetales	Micrococcineae
Hu 2020	11	1	Bacteria	32	Actinobacteria	Actinobacteria	Actinobacteridae	Actinomycetales	Micrococcineae
Hu 2020	12	1	Bacteria	32	Actinobacteria	Actinobacteria	Actinobacteridae	Actinomycetales	Micrococcineae
Hu 2020	1	2	Bacteria	32	Actinobacteria	Actinobacteria	Actinobacteridae	Actinomycetales	Micrococcineae
Hu 2020	2	2	Bacteria	32	Actinobacteria	Actinobacteria	Actinobacteridae	Actinomycetales	Micrococcineae
Hu 2020	8	2	Bacteria	32	Actinobacteria	Actinobacteria	Actinobacteridae	Actinomycetales	Micrococcineae
Hu 2020	9	2	Bacteria	32	Actinobacteria	Actinobacteria	Actinobacteridae	Actinomycetales	Micrococcineae
Hu 2020	10	2	Bacteria	32	Actinobacteria	Actinobacteria	Actinobacteridae	Actinomycetales	Micrococcineae
Hu 2020	11	2	Bacteria	32	Actinobacteria	Actinobacteria	Actinobacteridae	Actinomycetales	Micrococcineae
Hu 2020	12	2	Bacteria	32	Actinobacteria	Actinobacteria	Actinobacteridae	Actinomycetales	Micrococcineae
Hu 2020	8	3	Bacteria	32	Actinobacteria	Actinobacteria	Actinobacteridae	Actinomycetales	Streptomycineae
Hu 2020	9	3	Bacteria	32	Actinobacteria	Actinobacteria	Actinobacteridae	Actinomycetales	Micrococcineae
Hu 2020	10	3	Bacteria	32	Actinobacteria	Actinobacteria	Actinobacteridae	Actinomycetales	Micrococcineae
Hu 2020	12	3	Bacteria	32	Actinobacteria	Actinobacteria	Actinobacteridae	Actinomycetales	Micrococcineae
Hu 2020	9	4	Bacteria	32	Actinobacteria	Actinobacteria	Actinobacteridae	Actinomycetales	Micrococcineae
Hu 2020	10	4	Bacteria	32	Actinobacteria	Actinobacteria	Actinobacteridae	Actinomycetales	Micrococcineae
Hu 2020	12	4	Bacteria	32	Actinobacteria	Actinobacteria	Actinobacteridae	Actinomycetales	Micrococcineae
Hu 2020	12	5	Bacteria	32	Actinobacteria	Actinobacteria	Actinobacteridae	Actinomycetales	Micrococcineae
Hu 2020	12	6	Bacteria	32	Actinobacteria	Actinobacteria	Actinobacteridae	Actinomycetales	Micrococcineae
Hu 2020	12	7	Bacteria	32	Actinobacteria	Actinobacteria	Actinobacteridae	Actinomycetales	Micrococcineae
Castrillo 2017	1	1	Bacteria	35	Actinobacteria	Actinobacteria	Actinomycetales	Intrasporangiaceae	Terracoccus		273MFTsu3.1
Castrillo 2017	1	2	Bacteria	35	Actinobacteria	Actinobacteria	Actinomycetales	Microbacteriaceae	Curtobacterium		314Chir4.1
Castrillo 2017	1	3	Bacteria	35	Actinobacteria	Actinobacteria	Actinomycetales	Microbacteriaceae	Leifsonia		109
Castrillo 2017	1	4	Bacteria	35	Actinobacteria	Actinobacteria	Actinomycetales	Micrococcaceae	Arthrobacter		161MFSha2.1
Castrillo 2017	1	5	Bacteria	35	Actinobacteria	Actinobacteria	Actinomycetales	Micrococcaceae	Arthrobacter		UNC362MFTsu5.1
Castrillo 2017	1	6	Bacteria	35	Actinobacteria	Actinobacteria	Actinomycetales	Mycobacteriaceae	Mycobacterium		360MFTsu5.1
Castrillo 2017	1	7	Bacteria	35	Actinobacteria	Actinobacteria	Actinomycetales	Nocardiaceae	Rhodococcus		29MFTsu3.1
Castrillo 2017	1	8	Bacteria	35	Actinobacteria	Actinobacteria	Actinomycetales	Nocardioidaceae	Nocardioides		UNC345MFTsu5.1
Castrillo 2017	1	9	Bacteria	35	Actinobacteria	Actinobacteria	Actinomycetales	Promicromonosporaceae	Promicromonospora	sukumoe	327MFSha3.1
Castrillo 2017	1	10	Bacteria	35	Actinobacteria	Actinobacteria	Actinomycetales	Streptomycetaceae	Streptomyces	canus	299MFChir4.1
Castrillo 2017	1	11	Bacteria	35	Actinobacteria	Actinobacteria	Actinomycetales	Streptomycetaceae	Streptomyces		136MFCol5.1
Castrillo 2017	1	12	Bacteria	35	Actinobacteria	Actinobacteria	Actinomycetales	Streptomycetaceae	Streptomyces		303MFCol5.2
Castrillo 2017	1	13	Bacteria	35	Actinobacteria	Actinobacteria	Actinomycetales	Streptomycetaceae	Streptomyces		UNC401CLCol
Castrillo 2017	1	14	Bacteria	35	Actinobacteria	Actinobacteria	Corynebacteriales	Nocardiaceae	Rhodococcus		339MFSha3.1
Lebeis 2015	1	1	Bacteria	38	Actinobacteria	Actinobacteria	Actinomycetales	Microbacteriaceae	Leifsonia
Lebeis 2015	1	2	Bacteria	38	Actinobacteria	Actinobacteria	Actinomycetales	Micrococcaceae	Arthrobacter	nicotinovorans
Lebeis 2015	1	3	Bacteria	38	Actinobacteria	Actinobacteria	Actinomycetales	Micrococcaceae	Arthrobacter
Lebeis 2015	1	4	Bacteria	38	Actinobacteria	Actinobacteria	Actinomycetales	Mycobacteriaceae	Mycobacterium	mucogenicum
Lebeis 2015	1	5	Bacteria	38	Actinobacteria	Actinobacteria	Actinomycetales	Mycobacteriaceae
Lebeis 2015	1	6	Bacteria	38	Actinobacteria	Actinobacteria	Actinomycetales	Nocardiaceae	Rhodococcus	maanshanesis
Lebeis 2015	1	7	Bacteria	38	Actinobacteria	Actinobacteria	Actinomycetales	Nocardiaceae	Rhodococcus
Lebeis 2015	1	8	Bacteria	38	Actinobacteria	Actinobacteria	Actinomycetales	Nocardiaceae	Rhodococcus
Lebeis 2015	1	9	Bacteria	38	Actinobacteria	Actinobacteria	Actinomycetales	Promicromonosporaceae	Promicromonospora
Lebeis 2015	1	10	Bacteria	38	Actinobacteria	Actinobacteria	Actinomycetales	Streptomycetaceae	Streptomyces	rishirensis
Lebeis 2015	1	11	Bacteria	38	Actinobacteria	Actinobacteria	Actinomycetales	Streptomycetaceae	Streptomyces
Lebeis 2015	1	12	Bacteria	38	Actinobacteria	Actinobacteria	Actinomycetales	Streptomycetaceae	Streptomyces
Lebeis 2015	1	13	Bacteria	38	Actinobacteria	Actinobacteria	Actinomycetales	Streptomycetaceae	Streptomyces
Lebeis 2015	1	14	Bacteria	38	Actinobacteria	Actinobacteria	Micrococcales	Intrasporangiaceae	Terracoccus
Hartman 2017	1	1	Bacteria	84	Actinobacteria	Actinobacteria	Actinomycetales	Micrococcaceae	Microbacterium	oxydans
Herrera Paredes 2018	1	1	Bacteria	84	Actinobacteria	Actinobacteria	Actinomycetales	Microbacteriaceae	Cryocola		340MFSha3.1
Herrera Paredes 2018	1	2	Bacteria	84	Actinobacteria	Actinobacteria	Actinomycetales	Microbacteriaceae	Curtobacterium		UNCCL17
Herrera Paredes 2018	1	3	Bacteria	84	Actinobacteria	Actinobacteria	Actinomycetales	Microbacteriaceae	Leifsonia
Herrera Paredes 2018	1	4	Bacteria	84	Actinobacteria	Actinobacteria	Actinomycetales	Microbacteriaceae	Leifsonia
Herrera Paredes 2018	1	5	Bacteria	84	Actinobacteria	Actinobacteria	Actinomycetales	Microbacteriaceae	Leifsonia
Herrera Paredes 2018	1	6	Bacteria	84	Actinobacteria	Actinobacteria	Actinomycetales	Microbacteriaceae	Leifsonia
Herrera Paredes 2018	1	7	Bacteria	84	Actinobacteria	Actinobacteria	Actinomycetales	Microbacteriaceae	Microbacterium	paraoxydans	77MFTsu3.2
Herrera Paredes 2018	1	8	Bacteria	84	Actinobacteria	Actinobacteria	Actinomycetales	Microbacteriaceae	Microbacterium
Herrera Paredes 2018	1	9	Bacteria	84	Actinobacteria	Actinobacteria	Actinomycetales	Microbacteriaceae	Microbacterium
Herrera Paredes 2018	1	10	Bacteria	84	Actinobacteria	Actinobacteria	Actinomycetales	Micrococcaceae	Arthrobacter		131MFCol6.1
Herrera Paredes 2018	1	11	Bacteria	84	Actinobacteria	Actinobacteria	Actinomycetales	Micrococcaceae	Arthrobacter		UNCCL28
Herrera Paredes 2018	1	12	Bacteria	84	Actinobacteria	Actinobacteria	Actinomycetales	Micrococcaceae	Arthrobacter
Herrera Paredes 2018	1	13	Bacteria	84	Actinobacteria	Actinobacteria	Actinomycetales	Micrococcaceae	Arthrobacter
Herrera Paredes 2018	1	14	Bacteria	84	Actinobacteria	Actinobacteria	Actinomycetales	Micrococcaceae	Arthrobacter
Herrera Paredes 2018	1	15	Bacteria	84	Actinobacteria	Actinobacteria	Actinomycetales	Micrococcaceae	Renibacterium
Herrera Paredes 2018	1	16	Bacteria	84	Actinobacteria	Actinobacteria	Actinomycetales	Mycobacteriaceae	Mycobacterium		UNC267MFSha1.1M11
Herrera Paredes 2018	1	17	Bacteria	84	Actinobacteria	Actinobacteria	Actinomycetales	Mycobacteriaceae	Mycobacterium		UNCCL9
Herrera Paredes 2018	1	18	Bacteria	84	Actinobacteria	Actinobacteria	Actinomycetales	Mycobacteriaceae	Mycobacterium
Herrera Paredes 2018	1	19	Bacteria	84	Actinobacteria	Actinobacteria	Actinomycetales	Mycobacteriaceae	Mycobacterium
Herrera Paredes 2018	1	20	Bacteria	84	Actinobacteria	Actinobacteria	Actinomycetales	Nocardiaceae	Millisia
Herrera Paredes 2018	1	21	Bacteria	84	Actinobacteria	Actinobacteria	Actinomycetales	Nocardiaceae	Rhodococcus		UNC363MFTsu5.1
Herrera Paredes 2018	1	22	Bacteria	84	Actinobacteria	Actinobacteria	Actinomycetales	Nocardiaceae	Rhodococcus
Herrera Paredes 2018	1	23	Bacteria	84	Actinobacteria	Actinobacteria	Actinomycetales	Nocardiaceae	Rhodococcus
Herrera Paredes 2018	1	24	Bacteria	84	Actinobacteria	Actinobacteria	Actinomycetales	Nocardioidaceae	Nocardioides		UNC345MFTsu5.1
Herrera Paredes 2018	1	25	Bacteria	84	Actinobacteria	Actinobacteria	Actinomycetales	Streptomycetaceae	Streptomyces		351MFTsu5.1
Herrera Paredes 2018	1	26	Bacteria	84	Actinobacteria	Actinobacteria	Corynebacteriales	Mycobacteriaceae	Mycobacterium		283MFTsu
Herrera Paredes 2018	1	27	Bacteria	84	Actinobacteria	Actinobacteria	Corynebacteriales	Nocardiaceae	Rhodococcus	erythropolis	339MFSha3.1
Herrera Paredes 2018	1	28	Bacteria	84	Actinobacteria	Actinobacteria	Corynebacteriales	Nocardiaceae	Rhodococcus	maanshanensis	259MFSha1.1
Herrera Paredes 2018	1	29	Bacteria	84	Actinobacteria	Actinobacteria	Micrococcales	Microbacteriaceae	Microbacterium	azadirachtae	CL89
Durán 2018	1	1	Bacteria	148	Actinobacteria	Actinobacteria	Actinomycetales	Cellulomonadaceae	Cellulomonas		Root137
Durán 2018	1	2	Bacteria	148	Actinobacteria	Actinobacteria	Actinomycetales	Cellulomonadaceae	Oerskovia		Root22
Durán 2018	1	3	Bacteria	148	Actinobacteria	Actinobacteria	Actinomycetales	Microbacteriaceae	Agromyces		Root81
Durán 2018	1	4	Bacteria	148	Actinobacteria	Actinobacteria	Actinomycetales	Microbacteriaceae	Agromyces		Soil535
Durán 2018	1	5	Bacteria	148	Actinobacteria	Actinobacteria	Actinomycetales	Microbacteriaceae	Leifsonia		Root4
Durán 2018	1	6	Bacteria	148	Actinobacteria	Actinobacteria	Actinomycetales	Microbacteriaceae	Leifsonia		Root60
Durán 2018	1	7	Bacteria	148	Actinobacteria	Actinobacteria	Actinomycetales	Microbacteriaceae	Microbacterium		Root53
Durán 2018	1	8	Bacteria	148	Actinobacteria	Actinobacteria	Actinomycetales	Microbacteriaceae	Microbacterium		Root61
Durán 2018	1	9	Bacteria	148	Actinobacteria	Actinobacteria	Actinomycetales	Microbacteriaceae	Yonghaparkia		Soil809
Durán 2018	1	10	Bacteria	148	Actinobacteria	Actinobacteria	Actinomycetales	Micrococcaceae	Arthrobacter		Soil736
Durán 2018	1	11	Bacteria	148	Actinobacteria	Actinobacteria	Actinomycetales	Micrococcaceae	Arthrobacter		Soil761
Durán 2018	1	12	Bacteria	148	Actinobacteria	Actinobacteria	Actinomycetales	Micrococcaceae	Arthrobacter		Soil762
Durán 2018	1	13	Bacteria	148	Actinobacteria	Actinobacteria	Actinomycetales	Micrococcaceae	Arthrobacter		Soil763
Durán 2018	1	14	Bacteria	148	Actinobacteria	Actinobacteria	Actinomycetales	Micrococcaceae	Arthrobacter		Soil782
Durán 2018	1	15	Bacteria	148	Actinobacteria	Actinobacteria	Actinomycetales	Micrococcaceae	Arthrobacter		Soil764
Durán 2018	1	16	Bacteria	148	Actinobacteria	Actinobacteria	Actinomycetales	Micrococcaceae	Arthrobacter		Soil783
Durán 2018	1	17	Bacteria	148	Actinobacteria	Actinobacteria	Actinomycetales	Mycobacteriaceae	Mycobacterium		Root135
Durán 2018	1	18	Bacteria	148	Actinobacteria	Actinobacteria	Actinomycetales	Mycobacteriaceae	Mycobacterium		Soil538
Durán 2018	1	19	Bacteria	148	Actinobacteria	Actinobacteria	Actinomycetales	Nocardiaceae	Nocardia		Root136
Durán 2018	1	20	Bacteria	148	Actinobacteria	Actinobacteria	Actinomycetales	Nocardioidaceae	Aeromicrobium		Root236
Durán 2018	1	21	Bacteria	148	Actinobacteria	Actinobacteria	Actinomycetales	Nocardioidaceae	Aeromicrobium		Root701D2
Durán 2018	1	22	Bacteria	148	Actinobacteria	Actinobacteria	Actinomycetales	Nocardioidaceae	Nocardioides		Root79
Durán 2018	1	23	Bacteria	148	Actinobacteria	Actinobacteria	Actinomycetales	Nocardioidaceae	Nocardioides		Root122
Durán 2018	1	24	Bacteria	148	Actinobacteria	Actinobacteria	Actinomycetales	Nocardioidaceae	Nocardioides		Root240
Durán 2018	1	25	Bacteria	148	Actinobacteria	Actinobacteria	Actinomycetales	Nocardioidaceae	Nocardioides		Root614
Durán 2018	1	26	Bacteria	148	Actinobacteria	Actinobacteria	Actinomycetales	Nocardioidaceae	Nocardioides		Root682
Durán 2018	1	27	Bacteria	148	Actinobacteria	Actinobacteria	Actinomycetales	Nocardioidaceae	Nocardioides		Soil777
Durán 2018	1	28	Bacteria	148	Actinobacteria	Actinobacteria	Actinomycetales	Nocardioidaceae	Nocardioides		Root140
Durán 2018	1	29	Bacteria	148	Actinobacteria	Actinobacteria	Actinomycetales	Nocardioidaceae	Nocardioides		Soil797
Durán 2018	1	30	Bacteria	148	Actinobacteria	Actinobacteria	Actinomycetales	Streptomycetaceae	Kitasatospora		Root107
Durán 2018	1	31	Bacteria	148	Actinobacteria	Actinobacteria	Actinomycetales	Streptomycetaceae	Kitasatospora		Root187
Durán 2018	1	32	Bacteria	148	Actinobacteria	Actinobacteria	Actinomycetales	Streptomycetaceae	Streptomyces		Root63
Durán 2018	1	33	Bacteria	148	Actinobacteria	Actinobacteria	Actinomycetales	Streptomycetaceae	Streptomyces		Root66
Durán 2018	1	34	Bacteria	148	Actinobacteria	Actinobacteria	Actinomycetales	Streptomycetaceae	Streptomyces		Root369
Durán 2018	1	35	Bacteria	148	Actinobacteria	Actinobacteria	Actinomycetales	Streptomycetaceae	Streptomyces		Root431
Durán 2018	1	36	Bacteria	148	Actinobacteria	Actinobacteria	Actinomycetales	Streptomycetaceae	Streptomyces		Root1295
Durán 2018	1	37	Bacteria	148	Actinobacteria	Actinobacteria	Actinomycetales	Streptomycetaceae	Streptomyces		Root1310
Durán 2018	1	38	Bacteria	148	Actinobacteria	Actinobacteria	Actinomycetales	Streptomycetaceae	Streptomyces		Root66D1
Durán 2018	1	39	Bacteria	148	Actinobacteria	Actinobacteria	Actinomycetales	Streptomycetaceae	Streptomyces		Root264
Durán 2018	1	40	Bacteria	148	Actinobacteria	Actinobacteria	Actinomycetales	Streptomycetaceae	Streptomyces		Root1319
Durán 2018	1	41	Bacteria	148	Actinobacteria	Actinobacteria	Micrococcales	Intrasporangiaceae	Janibacter		Soil728
Durán 2018	1	42	Bacteria	148	Actinobacteria	Actinobacteria	Micrococcales	Intrasporangiaceae	Knoellia		Soil729
Durán 2018	1	43	Bacteria	148	Actinobacteria	Actinobacteria	Micrococcales	Intrasporangiaceae	Phycicoccus		Soil748
Durán 2018	1	44	Bacteria	148	Actinobacteria	Actinobacteria	Micrococcales	Intrasporangiaceae	Phycicoccus		Soil803
Durán 2018	1	45	Bacteria	148	Actinobacteria	Actinobacteria	Micrococcales	Intrasporangiaceae	Tetrasphaera		Soil756
Finkel 2019	1	1	Bacteria	183	Actinobacteria	Actinobacteria	Actinomycetales	Intrasporangiaceae	Terracoccus		MF273
Finkel 2019	1	2	Bacteria	183	Actinobacteria	Actinobacteria	Actinomycetales	Microbacteriaceae	Cryocola		MF340
Finkel 2019	1	3	Bacteria	183	Actinobacteria	Actinobacteria	Actinomycetales	Microbacteriaceae	Curtobacterium		CL17
Finkel 2019	1	4	Bacteria	183	Actinobacteria	Actinobacteria	Actinomycetales	Microbacteriaceae	Curtobacterium		CL20
Finkel 2019	1	5	Bacteria	183	Actinobacteria	Actinobacteria	Actinomycetales	Microbacteriaceae	Curtobacterium		MF314
Finkel 2019	1	6	Bacteria	183	Actinobacteria	Actinobacteria	Actinomycetales	Microbacteriaceae	Leifsonia		CL147
Finkel 2019	1	7	Bacteria	183	Actinobacteria	Actinobacteria	Actinomycetales	Microbacteriaceae	Leifsonia		MF109
Finkel 2019	1	8	Bacteria	183	Actinobacteria	Actinobacteria	Actinomycetales	Microbacteriaceae	Leifsonia		MF115A
Finkel 2019	1	9	Bacteria	183	Actinobacteria	Actinobacteria	Actinomycetales	Microbacteriaceae	Leifsonia		MF157
Finkel 2019	1	10	Bacteria	183	Actinobacteria	Actinobacteria	Actinomycetales	Microbacteriaceae	Leifsonia		MF197A
Finkel 2019	1	11	Bacteria	183	Actinobacteria	Actinobacteria	Actinomycetales	Microbacteriaceae	Leifsonia		MF21
Finkel 2019	1	12	Bacteria	183	Actinobacteria	Actinobacteria	Actinomycetales	Microbacteriaceae	Leifsonia		MF466
Finkel 2019	1	13	Bacteria	183	Actinobacteria	Actinobacteria	Actinomycetales	Microbacteriaceae	Leifsonia		MF467
Finkel 2019	1	14	Bacteria	183	Actinobacteria	Actinobacteria	Actinomycetales	Microbacteriaceae	Leifsonia		MF509
Finkel 2019	1	15	Bacteria	183	Actinobacteria	Actinobacteria	Actinomycetales	Microbacteriaceae	Leifsonia		MF98A
Finkel 2019	1	16	Bacteria	183	Actinobacteria	Actinobacteria	Actinomycetales	Microbacteriaceae	Microbacterium	azadirachtae	CL89
Finkel 2019	1	17	Bacteria	183	Actinobacteria	Actinobacteria	Actinomycetales	Microbacteriaceae	Microbacterium	mucogenicum	MF261
Finkel 2019	1	18	Bacteria	183	Actinobacteria	Actinobacteria	Actinomycetales	Microbacteriaceae	Microbacterium		CL10 (UNCCL10)
Finkel 2019	1	19	Bacteria	183	Actinobacteria	Actinobacteria	Actinomycetales	Microbacteriaceae	Microbacterium		CL127
Finkel 2019	1	20	Bacteria	183	Actinobacteria	Actinobacteria	Actinomycetales	Microbacteriaceae	Microbacterium		CL12A
Finkel 2019	1	21	Bacteria	183	Actinobacteria	Actinobacteria	Actinomycetales	Microbacteriaceae	Microbacterium		CL140
Finkel 2019	1	22	Bacteria	183	Actinobacteria	Actinobacteria	Actinomycetales	Microbacteriaceae	Microbacterium		CL152
Finkel 2019	1	23	Bacteria	183	Actinobacteria	Actinobacteria	Actinomycetales	Microbacteriaceae	Microbacterium		MF11
Finkel 2019	1	24	Bacteria	183	Actinobacteria	Actinobacteria	Actinomycetales	Microbacteriaceae	Microbacterium		MF292
Finkel 2019	1	25	Bacteria	183	Actinobacteria	Actinobacteria	Actinomycetales	Microbacteriaceae	Microbacterium		MF77
Finkel 2019	1	26	Bacteria	183	Actinobacteria	Actinobacteria	Actinomycetales	Micrococcaceae	Arthrobacter	nicotinovorans	MF231
Finkel 2019	1	27	Bacteria	183	Actinobacteria	Actinobacteria	Actinomycetales	Micrococcaceae	Arthrobacter	nicotinovorans	MF254
Finkel 2019	1	28	Bacteria	183	Actinobacteria	Actinobacteria	Actinomycetales	Micrococcaceae	Arthrobacter	nicotinovorans	MF26
Finkel 2019	1	29	Bacteria	183	Actinobacteria	Actinobacteria	Actinomycetales	Micrococcaceae	Arthrobacter		CL28
Finkel 2019	1	30	Bacteria	183	Actinobacteria	Actinobacteria	Actinomycetales	Micrococcaceae	Arthrobacter		CL63
Finkel 2019	1	31	Bacteria	183	Actinobacteria	Actinobacteria	Actinomycetales	Micrococcaceae	Arthrobacter		MF131
Finkel 2019	1	32	Bacteria	183	Actinobacteria	Actinobacteria	Actinomycetales	Micrococcaceae	Arthrobacter		MF135
Finkel 2019	1	33	Bacteria	183	Actinobacteria	Actinobacteria	Actinomycetales	Micrococcaceae	Arthrobacter		MF161
Finkel 2019	1	34	Bacteria	183	Actinobacteria	Actinobacteria	Actinomycetales	Micrococcaceae	Arthrobacter		MF162
Finkel 2019	1	35	Bacteria	183	Actinobacteria	Actinobacteria	Actinomycetales	Micrococcaceae	Arthrobacter		MF31
Finkel 2019	1	36	Bacteria	183	Actinobacteria	Actinobacteria	Actinomycetales	Micrococcaceae	Arthrobacter		MF362
Finkel 2019	1	37	Bacteria	183	Actinobacteria	Actinobacteria	Actinomycetales	Micrococcaceae	Arthrobacter		MF49
Finkel 2019	1	38	Bacteria	183	Actinobacteria	Actinobacteria	Actinomycetales	Micrococcaceae	Arthrobacter		MF9
Finkel 2019	1	39	Bacteria	183	Actinobacteria	Actinobacteria	Actinomycetales	Mycobacteriaceae	Mycobacterium		CL9
Finkel 2019	1	40	Bacteria	183	Actinobacteria	Actinobacteria	Actinomycetales	Mycobacteriaceae	Mycobacterium		MF267
Finkel 2019	1	41	Bacteria	183	Actinobacteria	Actinobacteria	Actinomycetales	Mycobacteriaceae	Mycobacterium		MF280
Finkel 2019	1	42	Bacteria	183	Actinobacteria	Actinobacteria	Actinomycetales	Mycobacteriaceae	Mycobacterium		MF283
Finkel 2019	1	43	Bacteria	183	Actinobacteria	Actinobacteria	Actinomycetales	Mycobacteriaceae	Mycobacterium		MF360
Finkel 2019	1	44	Bacteria	183	Actinobacteria	Actinobacteria	Actinomycetales	Mycobacteriaceae	Mycobacterium		MF365
Finkel 2019	1	45	Bacteria	183	Actinobacteria	Actinobacteria	Actinomycetales	Mycobacteriaceae	Mycobacterium		MF501A
Finkel 2019	1	46	Bacteria	183	Actinobacteria	Actinobacteria	Actinomycetales	Mycobacteriaceae	Mycobacterium		MF88
Finkel 2019	1	47	Bacteria	183	Actinobacteria	Actinobacteria	Actinomycetales	Nocardiaceae	Nocardia		MF348
Finkel 2019	1	48	Bacteria	183	Actinobacteria	Actinobacteria	Actinomycetales	Nocardiaceae	Nocardioides		MF345
Finkel 2019	1	49	Bacteria	183	Actinobacteria	Actinobacteria	Actinomycetales	Nocardiaceae	Rhodococcus	erythropolis	MF339
Finkel 2019	1	50	Bacteria	183	Actinobacteria	Actinobacteria	Actinomycetales	Nocardiaceae	Rhodococcus	maanshanensis	MF259
Finkel 2019	1	51	Bacteria	183	Actinobacteria	Actinobacteria	Actinomycetales	Nocardiaceae	Rhodococcus		MF114
Finkel 2019	1	52	Bacteria	183	Actinobacteria	Actinobacteria	Actinomycetales	Nocardiaceae	Rhodococcus		MF164
Finkel 2019	1	53	Bacteria	183	Actinobacteria	Actinobacteria	Actinomycetales	Nocardiaceae	Rhodococcus		MF23
Finkel 2019	1	54	Bacteria	183	Actinobacteria	Actinobacteria	Actinomycetales	Nocardiaceae	Rhodococcus		MF29
Finkel 2019	1	55	Bacteria	183	Actinobacteria	Actinobacteria	Actinomycetales	Nocardiaceae	Rhodococcus		MF363
Finkel 2019	1	56	Bacteria	183	Actinobacteria	Actinobacteria	Actinomycetales	Promicromonosporaceae	Promicromonospora	sukumoe	MF327
Finkel 2019	1	57	Bacteria	183	Actinobacteria	Actinobacteria	Actinomycetales	Streptomycetaceae	Streptomyces	canus	MF299
Finkel 2019	1	58	Bacteria	183	Actinobacteria	Actinobacteria	Actinomycetales	Streptomycetaceae	Streptomyces		CL18
Finkel 2019	1	59	Bacteria	183	Actinobacteria	Actinobacteria	Actinomycetales	Streptomycetaceae	Streptomyces		MF136
Finkel 2019	1	60	Bacteria	183	Actinobacteria	Actinobacteria	Actinomycetales	Streptomycetaceae	Streptomyces		MF140
Finkel 2019	1	61	Bacteria	183	Actinobacteria	Actinobacteria	Actinomycetales	Streptomycetaceae	Streptomyces		MF303
Finkel 2019	1	62	Bacteria	183	Actinobacteria	Actinobacteria	Actinomycetales	Streptomycetaceae	Streptomyces		MF351
Finkel 2019	1	63	Bacteria	183	Actinobacteria	Actinobacteria	Corynebacteriales	Mycobacteriaceae	Mycobacterium		MF455
Bai 2015	1	1	Bacteria	188	Actinobacteria	Actinobacteria	Actinomycetales	Cellulomonadaceae	Cellulomonas
Bai 2015	1	2	Bacteria	188	Actinobacteria	Actinobacteria	Actinomycetales	Cellulomonadaceae	Cellulomonas
Bai 2015	1	3	Bacteria	188	Actinobacteria	Actinobacteria	Actinomycetales	Cellulomonadaceae	Cellulomonas
Bai 2015	1	4	Bacteria	188	Actinobacteria	Actinobacteria	Actinomycetales	Cellulomonadaceae	Oerskovia
Bai 2015	1	5	Bacteria	188	Actinobacteria	Actinobacteria	Actinomycetales	Microbacteriaceae	Agromyces
Bai 2015	1	6	Bacteria	188	Actinobacteria	Actinobacteria	Actinomycetales	Microbacteriaceae	Agromyces
Bai 2015	1	7	Bacteria	188	Actinobacteria	Actinobacteria	Actinomycetales	Microbacteriaceae	Leifsonia
Bai 2015	1	8	Bacteria	188	Actinobacteria	Actinobacteria	Actinomycetales	Microbacteriaceae	Leifsonia
Bai 2015	1	9	Bacteria	188	Actinobacteria	Actinobacteria	Actinomycetales	Microbacteriaceae	Leifsonia
Bai 2015	1	10	Bacteria	188	Actinobacteria	Actinobacteria	Actinomycetales	Microbacteriaceae	Leifsonia
Bai 2015	1	11	Bacteria	188	Actinobacteria	Actinobacteria	Actinomycetales	Microbacteriaceae	Microbacterium
Bai 2015	1	12	Bacteria	188	Actinobacteria	Actinobacteria	Actinomycetales	Microbacteriaceae	Microbacterium
Bai 2015	1	13	Bacteria	188	Actinobacteria	Actinobacteria	Actinomycetales	Microbacteriaceae	Microbacterium
Bai 2015	1	14	Bacteria	188	Actinobacteria	Actinobacteria	Actinomycetales	Microbacteriaceae	Microbacterium
Bai 2015	1	15	Bacteria	188	Actinobacteria	Actinobacteria	Actinomycetales	Microbacteriaceae	Microbacterium
Bai 2015	1	16	Bacteria	188	Actinobacteria	Actinobacteria	Actinomycetales	Microbacteriaceae	Microbacterium
Bai 2015	1	17	Bacteria	188	Actinobacteria	Actinobacteria	Actinomycetales	Microbacteriaceae	Microbacterium
Bai 2015	1	18	Bacteria	188	Actinobacteria	Actinobacteria	Actinomycetales	Microbacteriaceae	Yonghaparkia
Bai 2015	1	19	Bacteria	188	Actinobacteria	Actinobacteria	Actinomycetales	Microbacteriaceae	Yonghaparkia
Bai 2015	1	20	Bacteria	188	Actinobacteria	Actinobacteria	Actinomycetales	Micrococcaceae	Arthrobacter
Bai 2015	1	21	Bacteria	188	Actinobacteria	Actinobacteria	Actinomycetales	Micrococcaceae	Arthrobacter
Bai 2015	1	22	Bacteria	188	Actinobacteria	Actinobacteria	Actinomycetales	Micrococcaceae	Arthrobacter
Bai 2015	1	23	Bacteria	188	Actinobacteria	Actinobacteria	Actinomycetales	Micrococcaceae	Arthrobacter
Bai 2015	1	24	Bacteria	188	Actinobacteria	Actinobacteria	Actinomycetales	Micrococcaceae	Arthrobacter
Bai 2015	1	25	Bacteria	188	Actinobacteria	Actinobacteria	Actinomycetales	Micrococcaceae	Arthrobacter
Bai 2015	1	26	Bacteria	188	Actinobacteria	Actinobacteria	Actinomycetales	Micrococcaceae	Arthrobacter
Bai 2015	1	27	Bacteria	188	Actinobacteria	Actinobacteria	Actinomycetales	Mycobacteriaceae	Mycobacterium
Bai 2015	1	28	Bacteria	188	Actinobacteria	Actinobacteria	Actinomycetales	Mycobacteriaceae	Mycobacterium
Bai 2015	1	29	Bacteria	188	Actinobacteria	Actinobacteria	Actinomycetales	Mycobacteriaceae	Mycobacterium
Bai 2015	1	30	Bacteria	188	Actinobacteria	Actinobacteria	Actinomycetales	Mycobacteriaceae	Mycobacterium
Bai 2015	1	31	Bacteria	188	Actinobacteria	Actinobacteria	Actinomycetales	Nocardiaceae	Nocardia
Bai 2015	1	32	Bacteria	188	Actinobacteria	Actinobacteria	Actinomycetales	Nocardioidaceae	Aeromicrobium
Bai 2015	1	33	Bacteria	188	Actinobacteria	Actinobacteria	Actinomycetales	Nocardioidaceae	Aeromicrobium
Bai 2015	1	34	Bacteria	188	Actinobacteria	Actinobacteria	Actinomycetales	Nocardioidaceae	Aeromicrobium
Bai 2015	1	35	Bacteria	188	Actinobacteria	Actinobacteria	Actinomycetales	Nocardioidaceae	Aeromicrobium
Bai 2015	1	36	Bacteria	188	Actinobacteria	Actinobacteria	Actinomycetales	Nocardioidaceae	Nocardioides
Bai 2015	1	37	Bacteria	188	Actinobacteria	Actinobacteria	Actinomycetales	Nocardioidaceae	Nocardioides
Bai 2015	1	38	Bacteria	188	Actinobacteria	Actinobacteria	Actinomycetales	Nocardioidaceae	Nocardioides
Bai 2015	1	39	Bacteria	188	Actinobacteria	Actinobacteria	Actinomycetales	Nocardioidaceae	Nocardioides
Bai 2015	1	40	Bacteria	188	Actinobacteria	Actinobacteria	Actinomycetales	Nocardioidaceae	Nocardioides
Bai 2015	1	41	Bacteria	188	Actinobacteria	Actinobacteria	Actinomycetales	Nocardioidaceae	Nocardioides
Bai 2015	1	42	Bacteria	188	Actinobacteria	Actinobacteria	Actinomycetales	Nocardioidaceae	Nocardioides
Bai 2015	1	43	Bacteria	188	Actinobacteria	Actinobacteria	Actinomycetales	Nocardioidaceae	Nocardioides
Bai 2015	1	44	Bacteria	188	Actinobacteria	Actinobacteria	Actinomycetales	Nocardioidaceae	Nocardioides
Bai 2015	1	45	Bacteria	188	Actinobacteria	Actinobacteria	Actinomycetales	Nocardioidaceae	Nocardioides
Bai 2015	1	46	Bacteria	188	Actinobacteria	Actinobacteria	Actinomycetales	Nocardioidaceae	Nocardioides
Bai 2015	1	47	Bacteria	188	Actinobacteria	Actinobacteria	Actinomycetales	Nocardioidaceae	Nocardioides
Bai 2015	1	48	Bacteria	188	Actinobacteria	Actinobacteria	Actinomycetales	Streptomycetaceae	Kitasatospora
Bai 2015	1	49	Bacteria	188	Actinobacteria	Actinobacteria	Actinomycetales	Streptomycetaceae	Kitasatospora
Bai 2015	1	50	Bacteria	188	Actinobacteria	Actinobacteria	Actinomycetales	Streptomycetaceae	Streptomyces
Bai 2015	1	51	Bacteria	188	Actinobacteria	Actinobacteria	Actinomycetales	Streptomycetaceae	Streptomyces
Bai 2015	1	52	Bacteria	188	Actinobacteria	Actinobacteria	Actinomycetales	Streptomycetaceae	Streptomyces
Bai 2015	1	53	Bacteria	188	Actinobacteria	Actinobacteria	Actinomycetales	Streptomycetaceae	Streptomyces
Bai 2015	1	54	Bacteria	188	Actinobacteria	Actinobacteria	Actinomycetales	Streptomycetaceae	Streptomyces
Bai 2015	1	55	Bacteria	188	Actinobacteria	Actinobacteria	Actinomycetales	Streptomycetaceae	Streptomyces
Bai 2015	1	56	Bacteria	188	Actinobacteria	Actinobacteria	Micrococcales	Intrasporangiaceae	Janibacter
Bai 2015	1	57	Bacteria	188	Actinobacteria	Actinobacteria	Micrococcales	Intrasporangiaceae	Knoellia
Bai 2015	1	58	Bacteria	188	Actinobacteria	Actinobacteria	Micrococcales	Intrasporangiaceae	Phycicoccus
Bai 2015	1	59	Bacteria	188	Actinobacteria	Actinobacteria	Micrococcales	Intrasporangiaceae	Phycicoccus
Bai 2015	1	60	Bacteria	188	Actinobacteria	Actinobacteria	Micrococcales	Intrasporangiaceae	Phycicoccus
Bai 2015	1	61	Bacteria	188	Actinobacteria	Actinobacteria	Micrococcales	Intrasporangiaceae	Phycicoccus
Bai 2015	1	62	Bacteria	188	Actinobacteria	Actinobacteria	Micrococcales	Intrasporangiaceae	Terrabacter
Bai 2015	1	63	Bacteria	188	Actinobacteria	Actinobacteria	Micrococcales	Intrasporangiaceae	Terrabacter
Bai 2015	1	64	Bacteria	188	Actinobacteria	Actinobacteria	Micrococcales	Intrasporangiaceae	Terrabacter
Bai 2015	1	65	Bacteria	188	Actinobacteria	Actinobacteria	Micrococcales	Intrasporangiaceae	Terrabacter
Bai 2015	1	66	Bacteria	188	Actinobacteria	Actinobacteria	Micrococcales	Intrasporangiaceae	Tetrasphaera
Bai 2015	1	67	Bacteria	188	Actinobacteria	Actinobacteria	Kineosporiales	Kineosporiaceae	Angustibacter

## Sheet: Firmicutes
Ref	SynCom	Strain no.	Domain	SynCom Size	Phylum	Class	Order	Family	Genus	Species	Strain		Etiquetas de fila	Cuenta de Family
Ijaz 2019	1	1	Bacteria	3	Firmicutes	Bacilli	Bacillales	Bacillaceae	Bacillus		BTH-11		Bacillaceae	204
Lee 2020	1	2	Bacteria	4	Firmicutes	Bacilli	Bacillales	Bacillaceae	Bacillus	niacini			Paenibacillaceae	33
Lee 2020	1	3	Bacteria	4	Firmicutes	Bacilli	Bacillales	Planococcaceae	Solibacillus	silvestris			Planococcaceae	17
Lee 2020	1	4	Bacteria	4	Firmicutes	Bacilli	Bacillales	Bacillaceae	Bacillus	luciferensis			Staphylococcaceae	9
Santhanam 2019	1	2	Bacteria	5	Firmicutes	Bacilli	Bacillales	Bacillaceae	Bacillus	megaterium	B55		(en blanco)
Santhanam 2019	1	3	Bacteria	5	Firmicutes	Bacilli	Bacillales	Bacillaceae	Bacillus	mojavensis	K1		Total general	263
Sánchez-Gorostiaga 2019	1	1	Bacteria	6	Firmicutes	Bacilli	Bacillales	Bacillaceae	Bacillus	cereus
Sánchez-Gorostiaga 2019	1	2	Bacteria	6	Firmicutes	Bacilli	Bacillales	Bacillaceae	Bacillus	megaterium
Sánchez-Gorostiaga 2019	1	3	Bacteria	6	Firmicutes	Bacilli	Bacillales	Bacillaceae	Bacillus	mojavensis
Sánchez-Gorostiaga 2019	1	4	Bacteria	6	Firmicutes	Bacilli	Bacillales	Bacillaceae	Bacillus	polymyxa
Sánchez-Gorostiaga 2019	1	5	Bacteria	6	Firmicutes	Bacilli	Bacillales	Bacillaceae	Bacillus	subtilis
Sánchez-Gorostiaga 2019	1	6	Bacteria	6	Firmicutes	Bacilli	Bacillales	Bacillaceae	Bacillus	thuringiensis
Zhang 2019	1	7	Bacteria	7	Firmicutes	Bacilli	Bacillales	Bacillaceae	Bacillus		R1383
Zhang 2019	1	8	Bacteria	7	Firmicutes	Bacilli	Bacillales	Bacillaceae	Bacillus		R1535
Zhang 2019	1	9	Bacteria	7	Firmicutes	Bacilli	Bacillales	Bacillaceae	Bacillus		R2027
Zhang 2019	1	10	Bacteria	7	Firmicutes	Bacilli	Bacillales	Bacillaceae	Bacillus		R2078b
Zheng 2019	1	3	Bacteria	7	Firmicutes	Bacilli	Bacillales	Bacillaceae	Bacillus	megaterium	CS22
Zhuang 2020	1	1	Bacteria	7	Firmicutes	Bacilli	Bacillales	Bacillaceae	Bacillus	simplex	B8-7
Moccia 2020	1	6	Bacteria	10	Firmicutes	Bacilli	Bacillales	Bacillaceae	Bacillus		R1
Moccia 2020	1	7	Bacteria	10	Firmicutes	Bacilli	Bacillales	Bacillaceae	Oceanobacillus		R79
Moccia 2020	1	8	Bacteria	10	Firmicutes	Bacilli	Bacillales	Bacillaceae	Oceanobacillus		R86
Moccia 2020	1	9	Bacteria	10	Firmicutes	Bacilli	Bacillales	Staphylococcaceae	Staphylococcus		R61
Moronta Barrios 2018	1	8	Bacteria	10	Firmicutes	Bacilli	Bacillales	Bacillaceae	Bacillus		E2315
Schulz-Bohm 2015	1	7	Bacteria	10	Firmicutes	Bacilli	Bacillales	Paenibacillaceae	Paenibacillus		AD087
Voges 2019	1	9	Bacteria	22	Firmicutes	Bacilli	Bacillales	Bacillaceae	Bacillus		Root11
Voges 2019	1	10	Bacteria	22	Firmicutes	Bacilli	Bacillales	Paenibacillaceae	Paenibacillus		Root444D2
Tsolakidou 2019	2	1	Bacteria	25	Firmicutes	Bacilli	Bacillales	Bacillaceae	Bacillus	chandigarhensis	3Ba3
Tsolakidou 2019	1	2	Bacteria	25	Firmicutes	Bacilli	Bacillales	Bacillaceae	Bacillus	endophyticus	1Ba2
Tsolakidou 2019	2	2	Bacteria	25	Firmicutes	Bacilli	Bacillales	Bacillaceae	Bacillus	endophyticus	1Ba2
Tsolakidou 2019	1	3	Bacteria	25	Firmicutes	Bacilli	Bacillales	Bacillaceae	Bacillus	humi	3Ba30
Tsolakidou 2019	2	3	Bacteria	25	Firmicutes	Bacilli	Bacillales	Bacillaceae	Bacillus	endophyticus	3Ba21
Tsolakidou 2019	1	4	Bacteria	25	Firmicutes	Bacilli	Bacillales	Bacillaceae	Bacillus	licheniformis	3Ba17
Tsolakidou 2019	2	4	Bacteria	25	Firmicutes	Bacilli	Bacillales	Bacillaceae	Bacillus	humi	1Ba28
Tsolakidou 2019	1	5	Bacteria	25	Firmicutes	Bacilli	Bacillales	Bacillaceae	Bacillus	licheniformis	3Ba9
Tsolakidou 2019	2	5	Bacteria	25	Firmicutes	Bacilli	Bacillales	Bacillaceae	Bacillus	humi	1Ba43
Tsolakidou 2019	1	6	Bacteria	25	Firmicutes	Bacilli	Bacillales	Bacillaceae	Bacillus	firmus	2Ba55
Tsolakidou 2019	2	6	Bacteria	25	Firmicutes	Bacilli	Bacillales	Bacillaceae	Bacillus	humi	3Ba30
Tsolakidou 2019	1	7	Bacteria	25	Firmicutes	Bacilli	Bacillales	Bacillaceae	Bacillus	firmus	2Ba2
Tsolakidou 2019	2	7	Bacteria	25	Firmicutes	Bacilli	Bacillales	Bacillaceae	Bacillus	licheniformis	1Ba18
Tsolakidou 2019	1	8	Bacteria	25	Firmicutes	Bacilli	Bacillales	Bacillaceae	Bacillus	niacini	1Ba10
Tsolakidou 2019	2	8	Bacteria	25	Firmicutes	Bacilli	Bacillales	Bacillaceae	Bacillus	licheniformis	3Ba16
Tsolakidou 2019	1	9	Bacteria	25	Firmicutes	Bacilli	Bacillales	Bacillaceae	Bacillus		2Ba43
Tsolakidou 2019	2	9	Bacteria	25	Firmicutes	Bacilli	Bacillales	Bacillaceae	Bacillus	licheniformis	3Ba17
Tsolakidou 2019	2	10	Bacteria	25	Firmicutes	Bacilli	Bacillales	Bacillaceae	Bacillus	licheniformis	3Ba20
Tsolakidou 2019	2	11	Bacteria	25	Firmicutes	Bacilli	Bacillales	Bacillaceae	Bacillus	licheniformis	3Ba28
Tsolakidou 2019	2	12	Bacteria	25	Firmicutes	Bacilli	Bacillales	Bacillaceae	Bacillus	licheniformis	3Ba44
Tsolakidou 2019	2	13	Bacteria	25	Firmicutes	Bacilli	Bacillales	Bacillaceae	Bacillus	licheniformis	3Ba45
Tsolakidou 2019	2	14	Bacteria	25	Firmicutes	Bacilli	Bacillales	Bacillaceae	Bacillus	licheniformis	3Ba46
Tsolakidou 2019	2	15	Bacteria	25	Firmicutes	Bacilli	Bacillales	Bacillaceae	Bacillus	licheniformis	3Ba9
Tsolakidou 2019	2	16	Bacteria	25	Firmicutes	Bacilli	Bacillales	Bacillaceae	Bacillus	megaterium	1Ba20
Tsolakidou 2019	2	17	Bacteria	25	Firmicutes	Bacilli	Bacillales	Bacillaceae	Bacillus	subtilis	1Ba19
Tsolakidou 2019	2	18	Bacteria	25	Firmicutes	Bacilli	Bacillales	Bacillaceae	Bacillus	subtilis	2Ba19s
Tsolakidou 2019	2	19	Bacteria	25	Firmicutes	Bacilli	Bacillales	Bacillaceae	Bacillus	subtilis	CCS
Tsolakidou 2019	2	20	Bacteria	25	Firmicutes	Bacilli	Bacillales	Bacillaceae	Bacillus	circulans	1Ba46
Tsolakidou 2019	2	21	Bacteria	25	Firmicutes	Bacilli	Bacillales	Bacillaceae	Bacillus	firmus	2Ba55
Tsolakidou 2019	2	22	Bacteria	25	Firmicutes	Bacilli	Bacillales	Bacillaceae	Bacillus	foraminis	1Ba49
Tsolakidou 2019	2	23	Bacteria	25	Firmicutes	Bacilli	Bacillales	Bacillaceae	Bacillus	niacini	1Ba10
Tsolakidou 2019	2	24	Bacteria	25	Firmicutes	Bacilli	Bacillales	Bacillaceae	Bacillus		2Ba43
Tsolakidou 2019	2	25	Bacteria	25	Firmicutes	Bacilli	Bacillales	Bacillaceae	Bacillus		3Ba35
Hu 2020	3	2	Bacteria	32	Firmicutes	Bacilli	Bacillales	Bacillaceae	Bacillus
Hu 2020	7	2	Bacteria	32	Firmicutes	Bacilli	Bacillales	Bacillaceae	Bacillus
Hu 2020	1	3	Bacteria	32	Firmicutes	Bacilli	Bacillales	Bacillaceae	Fictibacillus
Hu 2020	3	3	Bacteria	32	Firmicutes	Bacilli	Bacillales	Bacillaceae	Bacillus
Hu 2020	6	3	Bacteria	32	Firmicutes	Bacilli	Bacillales	Bacillaceae	Bacillus
Hu 2020	7	3	Bacteria	32	Firmicutes	Bacilli	Bacillales	Bacillaceae	Bacillus
Hu 2020	11	3	Bacteria	32	Firmicutes	Bacilli	Bacillales	Bacillaceae	Bacillus
Hu 2020	1	4	Bacteria	32	Firmicutes	Bacilli	Bacillales	Bacillaceae	Bacillus
Hu 2020	2	4	Bacteria	32	Firmicutes	Bacilli	Bacillales	Bacillaceae	Bacillus
Hu 2020	3	4	Bacteria	32	Firmicutes	Bacilli	Bacillales	Bacillaceae	Bacillus
Hu 2020	6	4	Bacteria	32	Firmicutes	Bacilli	Bacillales	Bacillaceae	Bacillus
Hu 2020	7	4	Bacteria	32	Firmicutes	Bacilli	Bacillales	Bacillaceae	Bacillus
Hu 2020	8	4	Bacteria	32	Firmicutes	Bacilli	Bacillales	Bacillaceae	Bacillus
Hu 2020	11	4	Bacteria	32	Firmicutes	Bacilli	Bacillales	Bacillaceae	Bacillus
Hu 2020	1	5	Bacteria	32	Firmicutes	Bacilli	Bacillales	Bacillaceae	Bacillus
Hu 2020	2	5	Bacteria	32	Firmicutes	Bacilli	Bacillales	Bacillaceae	Bacillus
Hu 2020	3	5	Bacteria	32	Firmicutes	Bacilli	Bacillales	Bacillaceae	Bacillus
Hu 2020	6	5	Bacteria	32	Firmicutes	Bacilli	Bacillales	Bacillaceae	Bacillus
Hu 2020	7	5	Bacteria	32	Firmicutes	Bacilli	Bacillales	Bacillaceae	Bacillus
Hu 2020	8	5	Bacteria	32	Firmicutes	Bacilli	Bacillales	Bacillaceae	Bacillus
Hu 2020	9	5	Bacteria	32	Firmicutes	Bacilli	Bacillales	Bacillaceae	Bacillus
Hu 2020	10	5	Bacteria	32	Firmicutes	Bacilli	Bacillales	Bacillaceae	Bacillus
Hu 2020	11	5	Bacteria	32	Firmicutes	Bacilli	Bacillales	Bacillaceae	Bacillus
Hu 2020	1	6	Bacteria	32	Firmicutes	Bacilli	Bacillales	Bacillaceae	Bacillus
Hu 2020	2	6	Bacteria	32	Firmicutes	Bacilli	Bacillales	Bacillaceae	Bacillus
Hu 2020	3	6	Bacteria	32	Firmicutes	Bacilli	Bacillales	Bacillaceae	Falsibacillus
Hu 2020	4	6	Bacteria	32	Firmicutes	Bacilli	Bacillales	Bacillaceae	Bacillus
Hu 2020	5	6	Bacteria	32	Firmicutes	Bacilli	Bacillales	Bacillaceae	Bacillus
Hu 2020	6	6	Bacteria	32	Firmicutes	Bacilli	Bacillales	Bacillaceae	Bacillus
Hu 2020	7	6	Bacteria	32	Firmicutes	Bacilli	Bacillales	Bacillaceae	Falsibacillus
Hu 2020	8	6	Bacteria	32	Firmicutes	Bacilli	Bacillales	Bacillaceae	Bacillus
Hu 2020	9	6	Bacteria	32	Firmicutes	Bacilli	Bacillales	Bacillaceae	Fictibacillus
Hu 2020	10	6	Bacteria	32	Firmicutes	Bacilli	Bacillales	Bacillaceae	Bacillus
Hu 2020	11	6	Bacteria	32	Firmicutes	Bacilli	Bacillales	Bacillaceae	Bacillus
Hu 2020	1	7	Bacteria	32	Firmicutes	Bacilli	Bacillales	Bacillaceae	Bacillus
Hu 2020	2	7	Bacteria	32	Firmicutes	Bacilli	Bacillales	Bacillaceae	Bacillus
Hu 2020	3	7	Bacteria	32	Firmicutes	Bacilli	Bacillales	Bacillaceae	Falsibacillus
Hu 2020	4	7	Bacteria	32	Firmicutes	Bacilli	Bacillales	Bacillaceae	Bacillus
Hu 2020	5	7	Bacteria	32	Firmicutes	Bacilli	Bacillales	Bacillaceae	Bacillus
Hu 2020	6	7	Bacteria	32	Firmicutes	Bacilli	Bacillales	Bacillaceae	Bacillus
Hu 2020	7	7	Bacteria	32	Firmicutes	Bacilli	Bacillales	Bacillaceae	Falsibacillus
Hu 2020	8	7	Bacteria	32	Firmicutes	Bacilli	Bacillales	Bacillaceae	Bacillus
Hu 2020	9	7	Bacteria	32	Firmicutes	Bacilli	Bacillales	Bacillaceae	Fictibacillus
Hu 2020	10	7	Bacteria	32	Firmicutes	Bacilli	Bacillales	Bacillaceae	Salirhabdus
Hu 2020	1	8	Bacteria	32	Firmicutes	Bacilli	Bacillales	Bacillaceae	Bacillus
Hu 2020	2	8	Bacteria	32	Firmicutes	Bacilli	Bacillales	Bacillaceae	Bacillus
Hu 2020	4	8	Bacteria	32	Firmicutes	Bacilli	Bacillales	Bacillaceae	Bacillus
Hu 2020	5	8	Bacteria	32	Firmicutes	Bacilli	Bacillales	Bacillaceae	Bacillus
Hu 2020	6	8	Bacteria	32	Firmicutes	Bacilli	Bacillales	Bacillaceae	Bacillus
Hu 2020	7	8	Bacteria	32	Firmicutes	Bacilli	Bacillales	Bacillaceae	Fictibacillus
Hu 2020	8	8	Bacteria	32	Firmicutes	Bacilli	Bacillales	Bacillaceae	Bacillus
Hu 2020	1	9	Bacteria	32	Firmicutes	Bacilli	Bacillales	Bacillaceae	Bacillus
Hu 2020	2	9	Bacteria	32	Firmicutes	Bacilli	Bacillales	Bacillaceae	Bacillus
Hu 2020	4	9	Bacteria	32	Firmicutes	Bacilli	Bacillales	Bacillaceae	Bacillus
Hu 2020	5	9	Bacteria	32	Firmicutes	Bacilli	Bacillales	Bacillaceae	Bacillus
Hu 2020	6	9	Bacteria	32	Firmicutes	Bacilli	Bacillales	Bacillaceae	Fictibacillus
Hu 2020	7	9	Bacteria	32	Firmicutes	Bacilli	Bacillales	Bacillaceae	Fictibacillus
Hu 2020	8	9	Bacteria	32	Firmicutes	Bacilli	Bacillales	Bacillaceae	Falsibacillus
Hu 2020	1	10	Bacteria	32	Firmicutes	Bacilli	Bacillales	Bacillaceae	Bacillus
Hu 2020	2	10	Bacteria	32	Firmicutes	Bacilli	Bacillales	Bacillaceae	Bacillus
Hu 2020	4	10	Bacteria	32	Firmicutes	Bacilli	Bacillales	Bacillaceae	Bacillus
Hu 2020	5	10	Bacteria	32	Firmicutes	Bacilli	Bacillales	Bacillaceae	Bacillus
Hu 2020	6	10	Bacteria	32	Firmicutes	Bacilli	Bacillales	Bacillaceae	Fictibacillus
Hu 2020	7	10	Bacteria	32	Firmicutes	Bacilli	Bacillales	Bacillaceae	Fictibacillus
Hu 2020	8	10	Bacteria	32	Firmicutes	Bacilli	Bacillales	Bacillaceae	Fictibacillus
Hu 2020	2	11	Bacteria	32	Firmicutes	Bacilli	Bacillales	Bacillaceae	Bacillus
Hu 2020	4	11	Bacteria	32	Firmicutes	Bacilli	Bacillales	Bacillaceae	Bacillus
Hu 2020	5	11	Bacteria	32	Firmicutes	Bacilli	Bacillales	Bacillaceae	Bacillus
Hu 2020	6	11	Bacteria	32	Firmicutes	Bacilli	Bacillales	Bacillaceae	Falsibacillus
Hu 2020	8	11	Bacteria	32	Firmicutes	Bacilli	Bacillales	Bacillaceae	Fictibacillus
Hu 2020	7	11	Bacteria	32	Firmicutes	Bacilli	Bacillales	Planococcaceae	Solibacillus
Hu 2020	2	12	Bacteria	32	Firmicutes	Bacilli	Bacillales	Bacillaceae	Fictibacillus
Hu 2020	4	12	Bacteria	32	Firmicutes	Bacilli	Bacillales	Bacillaceae	Bacillus
Hu 2020	5	12	Bacteria	32	Firmicutes	Bacilli	Bacillales	Bacillaceae	Bacillus
Hu 2020	6	12	Bacteria	32	Firmicutes	Bacilli	Bacillales	Bacillaceae	Fictibacillus
Hu 2020	8	12	Bacteria	32	Firmicutes	Bacilli	Bacillales	Paenibacillaceae	Paenibacillus
Hu 2020	7	12	Bacteria	32	Firmicutes	Bacilli	Bacillales	Planococcaceae	Solibacillus
Hu 2020	2	13	Bacteria	32	Firmicutes	Bacilli	Bacillales	Bacillaceae	Falsibacillus
Hu 2020	4	13	Bacteria	32	Firmicutes	Bacilli	Bacillales	Bacillaceae	Fictibacillus
Hu 2020	5	13	Bacteria	32	Firmicutes	Bacilli	Bacillales	Bacillaceae	Bacillus
Hu 2020	6	13	Bacteria	32	Firmicutes	Bacilli	Bacillales	Bacillaceae	Fictibacillus
Hu 2020	7	13	Bacteria	32	Firmicutes	Bacilli	Bacillales	Planococcaceae	Solibacillus
Hu 2020	8	13	Bacteria	32	Firmicutes	Bacilli	Bacillales	Planococcaceae	Lysinibacillus
Hu 2020	2	14	Bacteria	32	Firmicutes	Bacilli	Bacillales	Bacillaceae	Falsibacillus
Hu 2020	4	14	Bacteria	32	Firmicutes	Bacilli	Bacillales	Bacillaceae	Fictibacillus
Hu 2020	5	14	Bacteria	32	Firmicutes	Bacilli	Bacillales	Bacillaceae	Bacillus
Hu 2020	6	14	Bacteria	32	Firmicutes	Bacilli	Bacillales	Bacillaceae	Fictibacillus
Hu 2020	7	14	Bacteria	32	Firmicutes	Bacilli	Bacillales	Planococcaceae	Solibacillus
Hu 2020	8	14	Bacteria	32	Firmicutes	Bacilli	Bacillales	Planococcaceae	Lysinibacillus
Hu 2020	2	15	Bacteria	32	Firmicutes	Bacilli	Bacillales	Bacillaceae	Salirhabdus
Hu 2020	4	15	Bacteria	32	Firmicutes	Bacilli	Bacillales	Bacillaceae	Falsibacillus
Hu 2020	5	15	Bacteria	32	Firmicutes	Bacilli	Bacillales	Bacillaceae	Bacillus
Hu 2020	6	15	Bacteria	32	Firmicutes	Bacilli	Bacillales	Bacillaceae	Fictibacillus
Hu 2020	7	15	Bacteria	32	Firmicutes	Bacilli	Bacillales	Planococcaceae	Solibacillus
Hu 2020	8	15	Bacteria	32	Firmicutes	Bacilli	Bacillales	Planococcaceae	Lysinibacillus
Hu 2020	4	16	Bacteria	32	Firmicutes	Bacilli	Bacillales	Bacillaceae	Fictibacillus
Hu 2020	5	16	Bacteria	32	Firmicutes	Bacilli	Bacillales	Bacillaceae	Fictibacillus
Hu 2020	7	16	Bacteria	32	Firmicutes	Bacilli	Bacillales	Planococcaceae	Solibacillus
Hu 2020	8	16	Bacteria	32	Firmicutes	Bacilli	Bacillales	Staphylococcaceae	Staphylococcus
Hu 2020	4	17	Bacteria	32	Firmicutes	Bacilli	Bacillales	Bacillaceae	Fictibacillus
Hu 2020	5	17	Bacteria	32	Firmicutes	Bacilli	Bacillales	Bacillaceae	Salirhabdus
Hu 2020	7	17	Bacteria	32	Firmicutes	Bacilli	Bacillales	Planococcaceae	Solibacillus
Hu 2020	8	17	Bacteria	32	Firmicutes	Bacilli	Bacillales	Staphylococcaceae	Staphylococcus
Hu 2020	4	18	Bacteria	32	Firmicutes	Bacilli	Bacillales	Bacillaceae	Fictibacillus
Hu 2020	7	18	Bacteria	32	Firmicutes	Bacilli	Bacillales	Planococcaceae	Solibacillus
Hu 2020	8	18	Bacteria	32	Firmicutes	Bacilli	Bacillales	Staphylococcaceae	Staphylococcus
Hu 2020	4	19	Bacteria	32	Firmicutes	Bacilli	Bacillales	Bacillaceae	Fictibacillus
Hu 2020	7	19	Bacteria	32	Firmicutes	Bacilli	Bacillales	Planococcaceae	Solibacillus
Hu 2020	8	19	Bacteria	32	Firmicutes	Bacilli	Bacillales	Staphylococcaceae	Staphylococcus
Hu 2020	4	20	Bacteria	32	Firmicutes	Bacilli	Bacillales	Planococcaceae	Solibacillus
Hu 2020	7	20	Bacteria	32	Firmicutes	Bacilli	Bacillales	Planococcaceae	Solibacillus
Hu 2020	8	20	Bacteria	32	Firmicutes	Bacilli	Bacillales	Staphylococcaceae	Staphylococcus
Hu 2020	7	21	Bacteria	32	Firmicutes	Bacilli	Bacillales	Planococcaceae	Solibacillus
Hu 2020	8	21	Bacteria	32	Firmicutes	Bacilli	Bacillales	Staphylococcaceae	Staphylococcus
Hu 2020	7	22	Bacteria	32	Firmicutes	Bacilli	Bacillales	Planococcaceae	Lysinibacillus
Hu 2020	7	23	Bacteria	32	Firmicutes	Bacilli	Bacillales	Staphylococcaceae	Staphylococcus
Hu 2020	7	24	Bacteria	32	Firmicutes	Bacilli	Bacillales	Staphylococcaceae	Staphylococcus
Castrillo 2017	1	17	Bacteria	35	Firmicutes	Bacilli	Bacillales	Bacillaceae	Bacillus		105MF
Castrillo 2017	1	18	Bacteria	35	Firmicutes	Bacilli	Bacillales	Bacillaceae	Bacillus		27Col1.1E
Castrillo 2017	1	19	Bacteria	35	Firmicutes	Bacilli	Bacillales	Bacillaceae	Bacillus		UNC125MFCrub1.1
Castrillo 2017	1	20	Bacteria	35	Firmicutes	Bacilli	Bacillales	Bacillaceae	Bacillus		UNC41MFS5
Castrillo 2017	1	21	Bacteria	35	Firmicutes	Bacilli	Bacillales	Paenibacillaceae	Paenibacillus		181MFCol5.1
Lebeis 2015	1	21	Bacteria	38	Firmicutes	Bacilli	Bacillales	Bacillaceae	Bacillus
Lebeis 2015	1	22	Bacteria	38	Firmicutes	Bacilli	Bacillales	Bacillaceae	Bacillus
Lebeis 2015	1	23	Bacteria	38	Firmicutes	Bacilli	Bacillales	Bacillaceae	Bacillus
Lebeis 2015	1	24	Bacteria	38	Firmicutes	Bacilli	Bacillales	Paenibacillaceae	Unclassified
Gadhave 2018	1	1	Bacteria	84	Firmicutes	Bacilli	Bacillales	Bacillaceae	Bacillus	cereus	8 FW Athal
Gadhave 2018	1	2	Bacteria	84	Firmicutes	Bacilli	Bacillales	Bacillaceae	Bacillus	subtilis	NRRLB23051
Gadhave 2018	1	3	Bacteria	84	Firmicutes	Bacilli	Bacillales	Bacillaceae	Bacillus	amyloliquefaciens	FZB42-BGSC10A6
Herrera Paredes 2018	1	31	Bacteria	84	Firmicutes	Bacilli	Bacillales	Bacillaceae	Bacillus		123MFChir2
Herrera Paredes 2018	1	32	Bacteria	84	Firmicutes	Bacilli	Bacillales	Bacillaceae	Bacillus		215MF
Herrera Paredes 2018	1	33	Bacteria	84	Firmicutes	Bacilli	Bacillales	Bacillaceae	Bacillus		CL96
Herrera Paredes 2018	1	34	Bacteria	84	Firmicutes	Bacilli	Bacillales	Bacillaceae	Bacillus		UNC69MF
Herrera Paredes 2018	1	35	Bacteria	84	Firmicutes	Bacilli	Bacillales	Bacillaceae	Bacillus		UNCCL81
Herrera Paredes 2018	1	36	Bacteria	84	Firmicutes	Bacilli	Bacillales	Bacillaceae	Bacillus
Herrera Paredes 2018	1	37	Bacteria	84	Firmicutes	Bacilli	Bacillales	Bacillaceae	Bacillus
Herrera Paredes 2018	1	38	Bacteria	84	Firmicutes	Bacilli	Bacillales	Bacillaceae	Bacillus
Herrera Paredes 2018	1	39	Bacteria	84	Firmicutes	Bacilli	Bacillales	Bacillaceae	Bacillus
Herrera Paredes 2018	1	40	Bacteria	84	Firmicutes	Bacilli	Bacillales	Bacillaceae	Bacillus
Herrera Paredes 2018	1	41	Bacteria	84	Firmicutes	Bacilli	Bacillales	Bacillaceae	Bacillus
Herrera Paredes 2018	1	42	Bacteria	84	Firmicutes	Bacilli	Bacillales	Paenibacillaceae	Paenibacillus		UNC217MF
Herrera Paredes 2018	1	43	Bacteria	84	Firmicutes	Bacilli	Bacillales	Paenibacillaceae	Paenibacillus		UNC499MF
Herrera Paredes 2018	1	44	Bacteria	84	Firmicutes	Bacilli	Bacillales	Paenibacillaceae	Paenibacillus		UNCCL52
Herrera Paredes 2018	1	45	Bacteria	84	Firmicutes	Bacilli	Bacillales	Paenibacillaceae	Paenibacillus
Durán 2018	1	47	Bacteria	148	Firmicutes	Bacilli	Bacillales	Bacillaceae	Bacillus		Root147
Durán 2018	1	48	Bacteria	148	Firmicutes	Bacilli	Bacillales	Bacillaceae	Bacillus		Soil745
Durán 2018	1	49	Bacteria	148	Firmicutes	Bacilli	Bacillales	Bacillaceae	Bacillus		Soil768D1
Durán 2018	1	50	Bacteria	148	Firmicutes	Bacilli	Bacillales	Bacillaceae	Bacillus		Soil744D2
Durán 2018	1	51	Bacteria	148	Firmicutes	Bacilli	Bacillales	Paenibacillaceae	Paenibacillus		Soil522
Durán 2018	1	52	Bacteria	148	Firmicutes	Bacilli	Bacillales	Paenibacillaceae	Paenibacillus		Soil519D3
Durán 2018	1	53	Bacteria	148	Firmicutes	Bacilli	Bacillales	Paenibacillaceae	Paenibacillus		Soil724D2
Durán 2018	1	54	Bacteria	148	Firmicutes	Bacilli	Bacillales	Paenibacillaceae	Paenibacillus		Soil787
Finkel 2019	1	68	Bacteria	183	Firmicutes	Bacilli	Bacillales	Bacillaceae	Bacillus	flexus	MF27
Finkel 2019	1	69	Bacteria	183	Firmicutes	Bacilli	Bacillales	Bacillaceae	Bacillus		CL115
Finkel 2019	1	70	Bacteria	183	Firmicutes	Bacilli	Bacillales	Bacillaceae	Bacillus		CL13
Finkel 2019	1	71	Bacteria	183	Firmicutes	Bacilli	Bacillales	Bacillaceae	Bacillus		CL25
Finkel 2019	1	72	Bacteria	183	Firmicutes	Bacilli	Bacillales	Bacillaceae	Bacillus		CL72
Finkel 2019	1	73	Bacteria	183	Firmicutes	Bacilli	Bacillales	Bacillaceae	Bacillus		CL73
Finkel 2019	1	74	Bacteria	183	Firmicutes	Bacilli	Bacillales	Bacillaceae	Bacillus		CL81
Finkel 2019	1	75	Bacteria	183	Firmicutes	Bacilli	Bacillales	Bacillaceae	Bacillus		CL96
Finkel 2019	1	76	Bacteria	183	Firmicutes	Bacilli	Bacillales	Bacillaceae	Bacillus		MF103
Finkel 2019	1	77	Bacteria	183	Firmicutes	Bacilli	Bacillales	Bacillaceae	Bacillus		MF105
Finkel 2019	1	78	Bacteria	183	Firmicutes	Bacilli	Bacillales	Bacillaceae	Bacillus		MF106
Finkel 2019	1	79	Bacteria	183	Firmicutes	Bacilli	Bacillales	Bacillaceae	Bacillus		MF107
Finkel 2019	1	80	Bacteria	183	Firmicutes	Bacilli	Bacillales	Bacillaceae	Bacillus		MF112
Finkel 2019	1	81	Bacteria	183	Firmicutes	Bacilli	Bacillales	Bacillaceae	Bacillus		MF123
Finkel 2019	1	82	Bacteria	183	Firmicutes	Bacilli	Bacillales	Bacillaceae	Bacillus		MF125
Finkel 2019	1	83	Bacteria	183	Firmicutes	Bacilli	Bacillales	Bacillaceae	Bacillus		MF166A
Finkel 2019	1	84	Bacteria	183	Firmicutes	Bacilli	Bacillales	Bacillaceae	Bacillus		MF196
Finkel 2019	1	85	Bacteria	183	Firmicutes	Bacilli	Bacillales	Bacillaceae	Bacillus		MF212
Finkel 2019	1	86	Bacteria	183	Firmicutes	Bacilli	Bacillales	Bacillaceae	Bacillus		MF215
Finkel 2019	1	87	Bacteria	183	Firmicutes	Bacilli	Bacillales	Bacillaceae	Bacillus		MF322
Finkel 2019	1	88	Bacteria	183	Firmicutes	Bacilli	Bacillales	Bacillaceae	Bacillus		MF41
Finkel 2019	1	89	Bacteria	183	Firmicutes	Bacilli	Bacillales	Bacillaceae	Bacillus		MF491
Finkel 2019	1	90	Bacteria	183	Firmicutes	Bacilli	Bacillales	Bacillaceae	Bacillus		MF5
Finkel 2019	1	91	Bacteria	183	Firmicutes	Bacilli	Bacillales	Bacillaceae	Bacillus		MF69
Finkel 2019	1	92	Bacteria	183	Firmicutes	Bacilli	Bacillales	Bacillaceae	Bacillus		MF95
Finkel 2019	1	93	Bacteria	183	Firmicutes	Bacilli	Bacillales	Paenibacillaceae	Paenibacillus		CL117
Finkel 2019	1	94	Bacteria	183	Firmicutes	Bacilli	Bacillales	Paenibacillaceae	Paenibacillus		CL123
Finkel 2019	1	95	Bacteria	183	Firmicutes	Bacilli	Bacillales	Paenibacillaceae	Paenibacillus		CL130
Finkel 2019	1	96	Bacteria	183	Firmicutes	Bacilli	Bacillales	Paenibacillaceae	Paenibacillus		CL141A
Finkel 2019	1	97	Bacteria	183	Firmicutes	Bacilli	Bacillales	Paenibacillaceae	Paenibacillus		CL52
Finkel 2019	1	98	Bacteria	183	Firmicutes	Bacilli	Bacillales	Paenibacillaceae	Paenibacillus		CL91
Finkel 2019	1	99	Bacteria	183	Firmicutes	Bacilli	Bacillales	Paenibacillaceae	Paenibacillus		MF181
Finkel 2019	1	100	Bacteria	183	Firmicutes	Bacilli	Bacillales	Paenibacillaceae	Paenibacillus		MF217
Finkel 2019	1	101	Bacteria	183	Firmicutes	Bacilli	Bacillales	Paenibacillaceae	Paenibacillus		MF445
Finkel 2019	1	102	Bacteria	183	Firmicutes	Bacilli	Bacillales	Paenibacillaceae	Paenibacillus		MF451
Finkel 2019	1	103	Bacteria	183	Firmicutes	Bacilli	Bacillales	Paenibacillaceae	Paenibacillus		MF453
Finkel 2019	1	104	Bacteria	183	Firmicutes	Bacilli	Bacillales	Paenibacillaceae	Paenibacillus		MF496
Finkel 2019	1	105	Bacteria	183	Firmicutes	Bacilli	Bacillales	Paenibacillaceae	Paenibacillus		MF499
Bai 2015	1	72	Bacteria	188	Firmicutes	Bacilli	Bacillales	Bacillaceae	Bacillus
Bai 2015	1	73	Bacteria	188	Firmicutes	Bacilli	Bacillales	Bacillaceae	Bacillus
Bai 2015	1	74	Bacteria	188	Firmicutes	Bacilli	Bacillales	Bacillaceae	Bacillus
Bai 2015	1	75	Bacteria	188	Firmicutes	Bacilli	Bacillales	Bacillaceae	Bacillus
Bai 2015	1	76	Bacteria	188	Firmicutes	Bacilli	Bacillales	Bacillaceae	Bacillus
Bai 2015	1	77	Bacteria	188	Firmicutes	Bacilli	Bacillales	Bacillaceae	Bacillus
Bai 2015	1	78	Bacteria	188	Firmicutes	Bacilli	Bacillales	Bacillaceae	Bacillus
Bai 2015	1	79	Bacteria	188	Firmicutes	Bacilli	Bacillales	Paenibacillaceae	Paenibacillus
Bai 2015	1	80	Bacteria	188	Firmicutes	Bacilli	Bacillales	Paenibacillaceae	Paenibacillus
Bai 2015	1	81	Bacteria	188	Firmicutes	Bacilli	Bacillales	Paenibacillaceae	Paenibacillus
Bai 2015	1	82	Bacteria	188	Firmicutes	Bacilli	Bacillales	Paenibacillaceae	Paenibacillus
Bai 2015	1	83	Bacteria	188	Firmicutes	Bacilli	Bacillales	Paenibacillaceae	Paenibacillus
Bai 2015	1	84	Bacteria	188	Firmicutes	Bacilli	Bacillales	Paenibacillaceae	Paenibacillus
Bai 2015	1	85	Bacteria	188	Firmicutes	Bacilli	Bacillales	Paenibacillaceae	Paenibacillus
